# Supplementary material
Source: publisher figshare collection journal article supplement (https://gsajournals.figshare.com/ndownloader/files/26476877)
Supplement: Supplementary file 1 [file 26476877]

## Sheet: Legend
Supplementary Table 3. Summary of the different strains analyzed by luciferase activity.
The list includes description of all the experiments, strain (group) label, number of replicas and period and phase analyses.

## Sheet: Table S3
Experiment ID	Experiment name	Group Label	Locus	N	Period	Period Std		Circ. Phase To Zero	Circ. Phase To Window	Circ. Phase Std	Abs Phase To Zero	Abs Phase To Window	Abs Phase Std		Amplitude	Amplitude Std		GOF	ERR
14681	Neurospora TF Circadian Clock - 2012Apr10CD	xc391-1	NCU00097	3	20.73	0.1		22.23	8.34	0.3	19.2	7.2	0.26		94.5	24.93		0.33	0.09
14681	Neurospora TF Circadian Clock - 2012Apr10CD	xc391-2	NCU00097	3	21.63	0.04		20.79	7.48	0.31	18.73	6.73	0.25		158.6	6.74		0.27	0.06
14681	Neurospora TF Circadian Clock - 2012Apr10CD	xc391-3	NCU00097	3	21.92	0.25		20.23	7.09	0.59	18.47	6.47	0.38		184.6	50.05		0.24	0.05
14681	Neurospora TF Circadian Clock - 2012Apr10CD	xc391-4	NCU00097	3	21.09	0.27		22.46	8.81	0.96	19.73	7.73	0.59		92.49	18.84		0.35	0.08
14681	Neurospora TF Circadian Clock - 2012Apr10CD	xc407-1	NCU01154	3	21.06	0.4		22.42	8.74	0.85	19.67	7.67	0.42		54.56	7.77		0.36	0.12
14681	Neurospora TF Circadian Clock - 2012Apr10CD	xc407-2	NCU01154	3	21.05	0.44		21.23	7.55	1.53	18.6	6.6	0.95		95.36	40.03		0.18	0.06
14681	Neurospora TF Circadian Clock - 2012Apr10CD	xc407-3	NCU01154	3	20.7	0.78		21.54	7.63	0.98	18.57	6.57	0.55		62.3	16.62		0.24	0.09
14681	Neurospora TF Circadian Clock - 2012Apr10CD	xc407-4	NCU01154	3	20.96	0.48		21.8	8.06	1.41	19.03	7.03	1		48.23	15.24		0.36	0.12
14681	Neurospora TF Circadian Clock - 2012Apr10CD	xc407-5	NCU01154	3	20.88	0.72		22.11	8.32	1.73	19.2	7.2	0.85		56.48	16.3		0.33	0.12
14681	Neurospora TF Circadian Clock - 2012Apr10CD	xc407-6	NCU01154	3	20.83	0.21		22.47	8.64	1.23	19.5	7.5	0.92		110.5	69.41		0.27	0.1
14681	Neurospora TF Circadian Clock - 2012Apr10CD	xc407-7	NCU01154	3	21.06	0.58		21.47	7.79	0.42	18.83	6.83	0.21		60.69	7.88		0.29	0.09
14681	Neurospora TF Circadian Clock - 2012Apr10CD	xc405-1	NCU01243	3	22.2	0.25		20.69	7.72	0.74	19.13	7.13	0.47		175.6	63.28		0.27	0.06
14681	Neurospora TF Circadian Clock - 2012Apr10CD	xc405-2	NCU01243	3	22.17	0.17		21.44	8.45	0.64	19.8	7.8	0.44		164.9	24.18		0.34	0.08
14681	Neurospora TF Circadian Clock - 2012Apr10CD	xc405-4	NCU01243	3	22.13	0.06		20.61	7.59	0.46	19	7	0.4		123.7	38.79		0.24	0.06
14681	Neurospora TF Circadian Clock - 2012Apr10CD	xc398-1	NCU02094	2	20.96	0.01		22.84	9.1	0.07	19.95	7.95	0.07		96.99	7.65		0.34	0.07
14681	Neurospora TF Circadian Clock - 2012Apr10CD	xc398-2	NCU02094	3	21.74	0.06		20.76	7.52	0.06	18.8	6.8	0		217.2	35.44		0.32	0.07
14681	Neurospora TF Circadian Clock - 2012Apr10CD	xc398-3	NCU02094	3	21.58	0.24		21.1	7.75	0.36	18.97	6.97	0.12		147	15.86		0.28	0.07
14681	Neurospora TF Circadian Clock - 2012Apr10CD	xc390-1	NCU08480	3	21.46	0.15		22.11	8.69	0.56	19.77	7.77	0.46		239.8	98.14		0.24	0.07
14681	Neurospora TF Circadian Clock - 2012Apr10CD	xc390-2	NCU08480	3	21.61	0.19		22.07	8.74	0.44	19.87	7.87	0.25		135.8	16.77		0.19	0.06
14681	Neurospora TF Circadian Clock - 2012Apr10CD	xc390-3	NCU08480	3	21.45	0.24		21.14	7.71	0.19	18.9	6.9	0.1		222.6	51.21		0.22	0.06
14681	Neurospora TF Circadian Clock - 2012Apr10CD	xc390-4	NCU08480	3	21.51	0.29		22.14	8.75	0.76	19.83	7.83	0.45		134.6	24.5		0.23	0.06
14681	Neurospora TF Circadian Clock - 2012Apr10CD	x717-17	WT	6	21.64	0.14		21.11	7.8	0.49	19.03	7.03	0.33		187.4	47.01		0.22	0.06
14681	Neurospora TF Circadian Clock - 2012Apr10CD	x717-4	WT	6	21.7	0.12		20.37	7.1	0.47	18.42	6.42	0.37		202.4	68.32		0.21	0.06
14683	Neurospora TF Circadian Clock - 2012Jul04DF	xc616-1	NCU01122	3	21.73	0.23		21.18	7.93	0.95	19.17	7.17	0.67		91.55	34.28		0.23	0.05
14683	Neurospora TF Circadian Clock - 2012Jul04DF	xc616-2	NCU01122	3	21.86	0.06		20.78	7.61	1.07	18.93	6.93	0.97		113.3	29.39		0.31	0.07
14683	Neurospora TF Circadian Clock - 2012Jul04DF	xc616-3	NCU01122	3	21.91	0.13		20.05	6.9	1.09	18.3	6.3	0.89		97.31	21.97		0.27	0.06
14683	Neurospora TF Circadian Clock - 2012Jul04DF	xc617-2	NCU03699	3	21.1	0.13		21.23	7.58	0.1	18.67	6.67	0.06		112.1	33.18		0.18	0.05
14683	Neurospora TF Circadian Clock - 2012Jul04DF	xc617-3	NCU03699	3	21.02	0.3		22.66	8.96	1.29	19.83	7.83	0.86		79.05	24.16		0.19	0.04
14683	Neurospora TF Circadian Clock - 2012Jul04DF	xc617-4	NCU03699	3	20.93	0.1		22.17	8.41	1.2	19.33	7.33	1.02		100.7	65.27		0.22	0.06
14683	Neurospora TF Circadian Clock - 2012Jul04DF	xc617-5	NCU03699	3	21.28	0.26		22.44	8.91	1.48	19.8	7.8	1.38		99.54	58.47		0.25	0.06
14683	Neurospora TF Circadian Clock - 2012Jul04DF	xc665-1	NCU08651	3	21.1	0.06		21.39	7.75	0.56	18.8	6.8	0.46		99.28	33.95		0.23	0.07
14683	Neurospora TF Circadian Clock - 2012Jul04DF	xc665-2	NCU08651	3	20.76	0.25		21.54	7.66	0.21	18.63	6.63	0.4		77.79	18.1		0.19	0.05
14683	Neurospora TF Circadian Clock - 2012Jul04DF	xc665-3	NCU08651	3	20.65	0.2		21.7	7.75	0.6	18.67	6.67	0.38		111.2	14.56		0.2	0.05
14683	Neurospora TF Circadian Clock - 2012Jul04DF	x661-4	WT	6	21.85	0.29		20.51	7.33	0.18	18.67	6.67	0.25		117.9	27.17		0.23	0.06
14683	Neurospora TF Circadian Clock - 2012Jul04DF	x661-5	WT	6	21.64	0.1		20.24	6.93	0.46	18.25	6.25	0.38		124.3	23.94		0.14	0.04
14687	Neurospora TF Circadian Clock - 2012Jul25ABC	xc694-1	NCU07535	3	21.93	0.16		20.76	7.63	0.4	18.97	6.97	0.23		101.6	17.31		0.31	0.07
14687	Neurospora TF Circadian Clock - 2012Jul25ABC	xc694-2	NCU07535	3	21.76	0.15		21.15	7.92	0.73	19.17	7.17	0.57		79.93	16.76		0.31	0.08
14687	Neurospora TF Circadian Clock - 2012Jul25ABC	xc694-3	NCU07535	3	21.59	0.19		21.16	7.83	0.42	19.03	7.03	0.23		81.89	17.51		0.35	0.08
14687	Neurospora TF Circadian Clock - 2012Jul25ABC	xc694-4	NCU07535	3	21.34	0.35		22.62	9.12	1.15	20.1	8.1	0.75		104.7	42.15		0.25	0.06
14687	Neurospora TF Circadian Clock - 2012Jul25ABC	xc694-5	NCU07535	3	21.37	0.67		21.76	8.29	0.56	19.37	7.37	0.23		102.7	31.02		0.39	0.09
14687	Neurospora TF Circadian Clock - 2012Jul25ABC	xc693-1	NCU07705	3	21.68	0.4		21.64	8.36	1.04	19.53	7.53	0.59		143.1	6.32		0.29	0.06
14687	Neurospora TF Circadian Clock - 2012Jul25ABC	xc693-2	NCU07705	3	21.36	0.07		21.91	8.43	0.43	19.5	7.5	0.44		115.9	30.01		0.16	0.04
14687	Neurospora TF Circadian Clock - 2012Jul25ABC	xc693-3	NCU07705	3	21.33	0.16		21.94	8.44	0.23	19.5	7.5	0.35		142.4	13.25		0.24	0.06
14687	Neurospora TF Circadian Clock - 2012Jul25ABC	xc693-4	NCU07705	3	21.12	0.29		21.37	7.74	0.47	18.8	6.8	0.17		153.3	18.23		0.27	0.07
14687	Neurospora TF Circadian Clock - 2012Jul25ABC	x661-4	WT	6	21.89	0.12		20.63	7.48	0.3	18.82	6.82	0.23		124.9	32.67		0.3	0.07
14687	Neurospora TF Circadian Clock - 2012Jul25ABC	x661-5	WT	6	21.34	0.09		21.01	7.51	0.44	18.68	6.68	0.33		139.7	22.04		0.23	0.06
14691	Neurospora TF Circadian Clock - 2012Jun08F	xc539-1	NCU03593	3	21.82	0.21		20.39	7.19	0.47	18.53	6.53	0.46		87.85	31.4		0.22	0.06
14691	Neurospora TF Circadian Clock - 2012Jun08F	xc539-2	NCU03593	3	21.69	0.06		21.09	7.81	0.21	19.07	7.07	0.21		87.84	10.38		0.2	0.06
14691	Neurospora TF Circadian Clock - 2012Jun08F	xc539-3	NCU03593	3	21.59	0.1		21.16	7.83	0.8	19.03	7.03	0.64		157.8	65.01		0.16	0.05
14691	Neurospora TF Circadian Clock - 2012Jun08F	xc539-4	NCU03593	3	21.84	0.17		20.99	7.8	0.38	19.1	7.1	0.2		116.3	9.84		0.23	0.05
14691	Neurospora TF Circadian Clock - 2012Jun08F	xc533-1	NCU08289	3	20.95	0.4		23.01	9.27	1.74	20.21	8.21	1.36		133.4	61.49		0.24	0.07
14691	Neurospora TF Circadian Clock - 2012Jun08F	xc533-2	NCU08289	3	21.14	0.52		22.65	9.03	1.38	20.09	8.09	1.03		137.1	74.4		0.23	0.07
14691	Neurospora TF Circadian Clock - 2012Jun08F	xc533-3	NCU08289	3	21.07	0.09		22.02	8.35	0.3	19.33	7.33	0.21		92.86	21.37		0.23	0.07
14691	Neurospora TF Circadian Clock - 2012Jun08F	xc533-4	NCU08289	3	21.9	0.07		21.37	8.22	0.33	19.5	7.5	0.26		164.1	9.83		0.36	0.1
14691	Neurospora TF Circadian Clock - 2012Jun08F	xc533-5	NCU08289	3	21.97	0.11		20.98	7.88	0.3	19.2	7.2	0.3		208	31.58		0.21	0.06
14691	Neurospora TF Circadian Clock - 2012Jun08F	xc533-6	NCU08289	3	21.06	0.14		21.96	8.28	0.74	19.27	7.27	0.64		109.9	32.23		0.24	0.07
14691	Neurospora TF Circadian Clock - 2012Jun08F	x661-4	WT	3	22.01	0.06		20.57	7.48	0.22	18.87	6.87	0.15		178.7	53.45		0.23	0.07
14691	Neurospora TF Circadian Clock - 2012Jun08F	x661-5	WT	3	21.85	0.27		20.76	7.58	0.41	18.9	6.9	0.17		200	16.32		0.22	0.07
14680	Neurospora TF Circadian Clock - 2012Jun15BC	xc555-1	NCU04848	2	21.78	0.25		0.26	11.04	0.66	0.32	10.1	0.47		149	3.04		0.19	0.04
14680	Neurospora TF Circadian Clock - 2012Jun15BC	xc555-2	NCU04848	3	21.37	0.06		21.41	7.93	0.21	19.06	7.06	0.22		99.74	6.5		0.19	0.05
14680	Neurospora TF Circadian Clock - 2012Jun15BC	xc555-3	NCU04848	3	21.19	0.52		21.9	8.31	1.66	19.31	7.31	0.98		87.93	15.56		0.24	0.06
14680	Neurospora TF Circadian Clock - 2012Jun15BC	xc555-4	NCU04848	3	21.25	0.38		21.61	8.05	0.87	19.13	7.13	0.42		103.2	12.33		0.16	0.05
14680	Neurospora TF Circadian Clock - 2012Jun15BC	xc551-1	NCU04866	3	21.9	0.34		20.45	7.3	0.97	18.65	6.65	0.64		73.72	16.7		0.3	0.07
14680	Neurospora TF Circadian Clock - 2012Jun15BC	xc551-2	NCU04866	3	21.12	0.24		22.36	8.73	0.59	19.68	7.68	0.32		59.46	20.07		0.3	0.07
14680	Neurospora TF Circadian Clock - 2012Jun15BC	xc551-3	NCU04866	3	20.97	0.23		22.37	8.64	0.68	19.54	7.54	0.39		63.61	19.21		0.29	0.07
14680	Neurospora TF Circadian Clock - 2012Jun15BC	xc551-4	NCU04866	3	20.94	0.28		21.78	8.02	1.1	18.99	6.99	0.75		78.05	39.08		0.19	0.05
14680	Neurospora TF Circadian Clock - 2012Jun15BC	xc551-5	NCU04866	3	21.64	0.16		20.55	7.24	0.42	18.53	6.53	0.27		92.49	30.4		0.27	0.06
14680	Neurospora TF Circadian Clock - 2012Jun15BC	xc551-6	NCU04866	3	21.57	0.4		22.04	8.69	1.76	19.79	7.79	1.22		121.6	29.22		0.2	0.05
14680	Neurospora TF Circadian Clock - 2012Jun15BC	xc594-1	NCU05242	2	21.46	0.46		22.8	9.38	0.98	20.37	8.37	0.44		29.33	4.85		0.32	0.09
14680	Neurospora TF Circadian Clock - 2012Jun15BC	xc594-2	NCU05242	3	20.97	0.21		23.37	9.64	0.63	20.5	8.5	0.49		49.28	14.41		0.28	0.08
14680	Neurospora TF Circadian Clock - 2012Jun15BC	xc594-3	NCU05242	3	22.02	0.48		20.83	7.75	0.66	19.1	7.1	0.4		58.81	9.4		0.24	0.07
14680	Neurospora TF Circadian Clock - 2012Jun15BC	xc594-4	NCU05242	3	20.88	0.13		23.51	9.71	0.34	20.46	8.46	0.36		37.74	16.54		0.29	0.08
14680	Neurospora TF Circadian Clock - 2012Jun15BC	xc594-6	NCU05242	3	21.16	0.34		23.14	9.53	1.25	20.51	8.51	0.98		37.37	9.68		0.34	0.09
14680	Neurospora TF Circadian Clock - 2012Jun15BC	xc594-7	NCU05242	3	21.67	0.49		22.11	8.82	0.94	19.95	7.95	0.41		30.29	2.8		0.47	0.14
14680	Neurospora TF Circadian Clock - 2012Jun15BC	xc596-1	NCU06186	3	22.02	0.28		20.32	7.24	0.45	18.64	6.64	0.19		70.95	15.15		0.31	0.08
14680	Neurospora TF Circadian Clock - 2012Jun15BC	xc596-2	NCU06186	3	22.05	0.27		20.04	6.98	1.06	18.4	6.4	0.75		72.06	7.44		0.25	0.06
14680	Neurospora TF Circadian Clock - 2012Jun15BC	xc596-3	NCU06186	3	20.73	0.05		22.75	8.86	0.53	19.65	7.65	0.49		58.5	14.25		0.25	0.06
14680	Neurospora TF Circadian Clock - 2012Jun15BC	xc596-4	NCU06186	3	21.94	0.17		20.92	7.79	0.33	19.13	7.13	0.22		90.12	16.74		0.26	0.07
14680	Neurospora TF Circadian Clock - 2012Jun15BC	xc596-5	NCU06186	3	20.83	0.19		22.44	8.62	1.13	19.47	7.47	0.82		48.52	22.73		0.24	0.06
14680	Neurospora TF Circadian Clock - 2012Jun15BC	xc596-6	NCU06186	3	22.1	0.15		20.18	7.15	0.12	18.59	6.59	0.02		93.17	14.6		0.25	0.06
14680	Neurospora TF Circadian Clock - 2012Jun15BC	xc553-2	NCU08999	3	23.26	0.11		23.4	11.02	0.18	22.68	10.68	0.25		58.47	19.17		0.26	0.06
14680	Neurospora TF Circadian Clock - 2012Jun15BC	xc553-3	NCU08999	3	23.11	0.13		23.03	10.57	0.46	22.17	10.17	0.36		84.93	19.88		0.25	0.06
14680	Neurospora TF Circadian Clock - 2012Jun15BC	xc553-4	NCU08999	3	22.88	0.17		23.65	11.07	1.32	22.6	10.6	1.16		80.12	27.47		0.21	0.05
14680	Neurospora TF Circadian Clock - 2012Jun15BC	xc553-5	NCU08999	3	23.13	0.28		23.1	10.65	0.39	22.26	10.26	0.56		84.37	6.77		0.21	0.05
14680	Neurospora TF Circadian Clock - 2012Jun15BC	xc553-6	NCU08999	3	23	0.32		23.89	11.36	1.17	22.98	10.98	0.96		94.05	16.71		0.25	0.06
14680	Neurospora TF Circadian Clock - 2012Jun15BC	xc553-7	NCU08999	3	23	0.71		22.93	10.4	1.14	22.2	10.2	0.84		111.8	11.43		0.18	0.04
14680	Neurospora TF Circadian Clock - 2012Jun15BC	xc547-1	NCU09529	3	21.66	0.55		21.74	8.44	1.57	19.59	7.59	0.97		110.4	72.97		0.33	0.08
14680	Neurospora TF Circadian Clock - 2012Jun15BC	xc547-2	NCU09529	2	21.97	0		20.64	7.53	0.05	18.9	6.9	0.05		85.34	3.1		0.33	0.08
14680	Neurospora TF Circadian Clock - 2012Jun15BC	xc547-3	NCU09529	3	21.75	0.19		21.06	7.82	0.98	19.08	7.08	0.74		326.9	72.68		0.25	0.05
14680	Neurospora TF Circadian Clock - 2012Jun15BC	xc547-4	NCU09529	3	21.49	0.58		21.61	8.21	1.64	19.32	7.32	0.94		120.5	22.49		0.28	0.07
14680	Neurospora TF Circadian Clock - 2012Jun15BC	xc547-5	NCU09529	3	22.07	0.16		20.61	7.56	0.26	18.95	6.95	0.14		109.2	28.4		0.26	0.07
14680	Neurospora TF Circadian Clock - 2012Jun15BC	xc547-6	NCU09529	3	21.52	0.2		22.16	8.78	0.91	19.87	7.87	0.64		91.05	16.94		0.26	0.06
14680	Neurospora TF Circadian Clock - 2012Jun15BC	xc547-7	NCU09529	3	21.8	0.4		21.4	8.19	0.83	19.43	7.43	0.4		84.84	9.12		0.23	0.06
14680	Neurospora TF Circadian Clock - 2012Jun15BC	x661-4	WT	6	21.72	0.19		21.16	7.9	1.13	19.14	7.14	0.87		86.45	22.93		0.24	0.06
14680	Neurospora TF Circadian Clock - 2012Jun15BC	x661-5	WT	6	21.63	0.26		20.99	7.68	0.42	18.92	6.92	0.36		123.4	27.27		0.2	0.05
14682	Neurospora TF Circadian Clock - 2012Jun22CE	xc611-1	NCU00694	3	20.85	0.54		23.16	9.35	1.14	20.23	8.23	0.7		59.16	8.54		0.35	0.08
14682	Neurospora TF Circadian Clock - 2012Jun22CE	xc611-2	NCU00694	3	21.72	0.06		21.07	7.81	0.48	19.07	7.07	0.4		80.56	16.76		0.26	0.06
14682	Neurospora TF Circadian Clock - 2012Jun22CE	xc611-3	NCU00694	3	21.32	0.4		21.93	8.42	1.06	19.47	7.47	0.67		57.59	12.26		0.32	0.1
14682	Neurospora TF Circadian Clock - 2012Jun22CE	xc611-4	NCU00694	3	21.89	0.46		21.1	7.94	0.99	19.23	7.23	0.58		73.09	44.16		0.33	0.09
14682	Neurospora TF Circadian Clock - 2012Jun22CE	xc606-1	NCU02173	3	21.55	0.55		22.16	8.8	0.79	19.9	7.9	0.85		57.63	33.03		0.32	0.08
14682	Neurospora TF Circadian Clock - 2012Jun22CE	xc606-2	NCU02173	3	21.55	0.39		21.62	8.25	0.97	19.4	7.4	0.56		78.41	3.88		0.24	0.05
14682	Neurospora TF Circadian Clock - 2012Jun22CE	xc606-3	NCU02173	3	21.07	0.1		22.59	8.92	0.36	19.83	7.83	0.25		63.99	6.26		0.35	0.09
14682	Neurospora TF Circadian Clock - 2012Jun22CE	xc606-4	NCU02173	3	21.64	0.31		21.41	8.1	0.53	19.3	7.3	0.2		103.2	12.02		0.29	0.07
14682	Neurospora TF Circadian Clock - 2012Jun22CE	xc606-5	NCU02173	3	21.47	0.39		22.67	9.26	1.27	20.41	8.41	1		78.25	19.71		0.36	0.1
14682	Neurospora TF Circadian Clock - 2012Jun22CE	xc606-6	NCU02173	3	21.43	0.12		21.58	8.14	0.51	19.27	7.27	0.35		90.97	9.91		0.28	0.06
14682	Neurospora TF Circadian Clock - 2012Jun22CE	xc599-1	NCU07379	3	21.44	0.09		20.9	7.47	0.83	18.67	6.67	0.7		101.9	23.33		0.22	0.07
14682	Neurospora TF Circadian Clock - 2012Jun22CE	xc599-2	NCU07379	3	22.06	0.3		20.43	7.38	1.63	18.77	6.77	1.25		126.5	46.66		0.33	0.09
14682	Neurospora TF Circadian Clock - 2012Jun22CE	xc599-3	NCU07379	3	21.6	0.31		20.78	7.44	0.74	18.7	6.7	0.44		176.9	40.3		0.33	0.07
14682	Neurospora TF Circadian Clock - 2012Jun22CE	xc599-4	NCU07379	3	21.97	0.08		20.61	7.5	0.08	18.87	6.87	0.06		140.8	21.09		0.32	0.07
14682	Neurospora TF Circadian Clock - 2012Jun22CE	xc603-1	NCU10006	3	21.2	0.18		22.04	8.46	0.28	19.47	7.47	0.15		114.7	8.11		0.22	0.06
14682	Neurospora TF Circadian Clock - 2012Jun22CE	xc603-2	NCU10006	3	20.95	0.24		23	9.26	1.17	20.15	8.15	1.04		57.95	19.73		0.38	0.11
14682	Neurospora TF Circadian Clock - 2012Jun22CE	xc603-3	NCU10006	3	20.77	0.46		22.73	8.86	0.62	19.67	7.67	0.81		70.6	32.43		0.29	0.09
14682	Neurospora TF Circadian Clock - 2012Jun22CE	x661-4	WT	6	21.94	0.23		19.8	6.67	0.47	18.1	6.1	0.47		120.3	30.34		0.21	0.06
14682	Neurospora TF Circadian Clock - 2012Jun22CE	x661-5	WT	6	21.62	0.19		20.39	7.07	0.44	18.37	6.37	0.29		155.3	50.48		0.24	0.06
14669	Neurospora TF Circadian Clock - 2013Feb01CD	xc1054-1	NCU01640	3	21.14	0.3		23.39	9.76	1.13	20.68	8.68	0.91		69.12	30.9		0.23	0.05
14669	Neurospora TF Circadian Clock - 2013Feb01CD	xc1054-2	NCU01640	3	21.02	0.17		23.37	9.67	0.94	20.53	8.53	0.76		82.8	10.44		0.34	0.09
14669	Neurospora TF Circadian Clock - 2013Feb01CD	xc1054-3	NCU01640	3	21.53	0.15		21.66	8.28	0.05	19.43	7.43	0.12		88.51	12.4		0.24	0.06
14669	Neurospora TF Circadian Clock - 2013Feb01CD	xc1050-1	NCU02182	3	21.84	0.09		21.39	8.2	0.33	19.47	7.47	0.23		171.6	4.99		0.23	0.06
14669	Neurospora TF Circadian Clock - 2013Feb01CD	xc1050-2	NCU02182	3	21.81	0.23		22.23	9.02	0.33	20.2	8.2	0.1		128.4	52.83		0.15	0.05
14669	Neurospora TF Circadian Clock - 2013Feb01CD	xc1050-3	NCU02182	3	21.37	0.47		0.02	10.55	1.61	0.15	9.52	1.19		93.59	85.56		0.25	0.07
14669	Neurospora TF Circadian Clock - 2013Feb01CD	xc1040-1	NCU04827	3	21.51	0.13		22.1	8.71	0.8	19.8	7.8	0.61		87.68	12.85		0.19	0.05
14669	Neurospora TF Circadian Clock - 2013Feb01CD	xc1040-2	NCU04827	3	21.21	0.23		23.01	9.44	0.23	20.33	8.33	0.12		116.3	7.57		0.21	0.05
14669	Neurospora TF Circadian Clock - 2013Feb01CD	xc1040-4	NCU04827	3	21.41	0.1		22.61	9.16	0.19	20.17	8.17	0.25		114.7	18.22		0.23	0.07
14669	Neurospora TF Circadian Clock - 2013Feb01CD	xc1040-5	NCU04827	3	21.94	0.08		21.62	8.49	0.09	19.77	7.77	0.06		88.66	7.6		0.25	0.05
14669	Neurospora TF Circadian Clock - 2013Feb01CD	xc1040-6	NCU04827	3	21.52	0.17		22.68	9.3	0.96	20.33	8.33	0.74		92.69	1.62		0.2	0.06
14669	Neurospora TF Circadian Clock - 2013Feb01CD	xc1059-1	NCU05294	3	21.12	0.06		22.35	8.72	0.78	19.67	7.67	0.64		94.93	35.58		0.25	0.06
14669	Neurospora TF Circadian Clock - 2013Feb01CD	xc1059-2	NCU05294	3	21.44	0.33		22.93	9.49	1.09	20.47	8.47	0.67		56.47	3.62		0.3	0.07
14669	Neurospora TF Circadian Clock - 2013Feb01CD	xc1059-3	NCU05294	3	21.38	0.12		21.93	8.46	0.93	19.53	7.53	0.75		53.74	5.16		0.22	0.05
14669	Neurospora TF Circadian Clock - 2013Feb01CD	xc1059-4	NCU05294	3	21.01	0.16		23.15	9.45	0.52	20.27	8.27	0.31		58.17	26.5		0.25	0.06
14669	Neurospora TF Circadian Clock - 2013Feb01CD	xc1059-5	NCU05294	3	20.73	0.41		23.31	9.41	0.39	20.13	8.13	0.32		58.39	23.02		0.34	0.09
14669	Neurospora TF Circadian Clock - 2013Feb01CD	xc1059-6	NCU05294	3	21.65	0.17		21.99	8.69	0.81	19.83	7.83	0.6		90.97	13.29		0.26	0.06
14669	Neurospora TF Circadian Clock - 2013Feb01CD	xc1048-1	NCU05685	3	22.02	0.14		20.82	7.74	0.37	19.1	7.1	0.26		196	11.64		0.29	0.07
14669	Neurospora TF Circadian Clock - 2013Feb01CD	xc1048-2	NCU05685	3	21.89	0.04		20.61	7.46	0.17	18.8	6.8	0.17		108.7	16.41		0.21	0.06
14669	Neurospora TF Circadian Clock - 2013Feb01CD	xc1048-3	NCU05685	3	22.26	0.09		20.31	7.37	0.56	18.83	6.83	0.45		156.2	11.38		0.28	0.06
14669	Neurospora TF Circadian Clock - 2013Feb01CD	xc1048-4	NCU05685	3	22.24	0.11		20.51	7.56	0.29	19	7	0.26		176.7	4.58		0.3	0.07
14669	Neurospora TF Circadian Clock - 2013Feb01CD	xc1048-5	NCU05685	3	22.21	0.08		20.49	7.52	0.6	18.97	6.97	0.49		139.4	8.17		0.26	0.06
14669	Neurospora TF Circadian Clock - 2013Feb01CD	xc1048-6	NCU05685	3	22.73	0.15		20.06	7.39	0.29	19	7	0.2		125.5	29.23		0.26	0.06
14669	Neurospora TF Circadian Clock - 2013Feb01CD	xc1041-1	NCU07669	3	21.07	0.29		22.67	9	0.22	19.9	7.9	0.1		87.73	25.55		0.44	0.11
14669	Neurospora TF Circadian Clock - 2013Feb01CD	xc1041-2	NCU07669	3	21.09	0.13		22.35	8.69	0.76	19.63	7.63	0.55		85.1	6.99		0.38	0.1
14669	Neurospora TF Circadian Clock - 2013Feb01CD	xc1041-3	NCU07669	3	21.52	0.14		20.74	7.36	0.22	18.6	6.6	0.17		87.22	17.16		0.14	0.05
14669	Neurospora TF Circadian Clock - 2013Feb01CD	xc1041-4	NCU07669	3	21.25	0.04		22.06	8.5	0.72	19.53	7.53	0.64		72.46	7.25		0.31	0.08
14669	Neurospora TF Circadian Clock - 2013Feb01CD	xc1056-1	NCU09549	3	21.86	0.45		20.77	7.6	1.4	18.9	6.9	0.87		85.18	11.64		0.29	0.07
14669	Neurospora TF Circadian Clock - 2013Feb01CD	xc1056-2	NCU09549	3	21.12	0.15		22.12	8.49	0.55	19.47	7.47	0.59		62.47	9.88		0.33	0.08
14669	Neurospora TF Circadian Clock - 2013Feb01CD	xc1056-3	NCU09549	3	21.61	0.32		21.68	8.35	1.64	19.5	7.5	1.18		82.23	5.99		0.29	0.07
14669	Neurospora TF Circadian Clock - 2013Feb01CD	xc1056-4	NCU09549	3	20.83	0.24		23.25	9.42	1.25	20.23	8.23	0.93		78.52	11.25		0.31	0.08
14669	Neurospora TF Circadian Clock - 2013Feb01CD	xc1056-5	NCU09549	3	21.14	0.22		22.51	8.89	0.33	19.83	7.83	0.4		72.07	13.55		0.27	0.07
14669	Neurospora TF Circadian Clock - 2013Feb01CD	xc1056-6	NCU09549	3	21.25	0.47		22.07	8.52	0.78	19.53	7.53	0.31		105.5	29.21		0.23	0.05
14669	Neurospora TF Circadian Clock - 2013Feb01CD	xc1056-7	NCU09549	3	21.77	0.02		21.02	7.79	0.51	19.07	7.07	0.47		86.62	11.1		0.26	0.06
14669	Neurospora TF Circadian Clock - 2013Feb01CD	x661-4	WT	6	21.79	0.24		20.71	7.49	0.75	18.8	6.8	0.51		135.5	21.48		0.27	0.07
14669	Neurospora TF Circadian Clock - 2013Feb01CD	x661-5	WT	6	21.5	0.16		20.6	7.2	0.29	18.45	6.45	0.3		159.8	27.97		0.21	0.06
14668	Neurospora TF Circadian Clock - 2013Feb08CD	xc1068-1	NCU00054	3	22.03	0.25		20.01	6.94	0.45	18.37	6.37	0.29		76.11	11.78		0.29	0.07
14668	Neurospora TF Circadian Clock - 2013Feb08CD	xc1068-2	NCU00054	3	22.27	0.17		20.05	7.11	0.43	18.6	6.6	0.26		61.33	9.28		0.45	0.11
14668	Neurospora TF Circadian Clock - 2013Feb08CD	xc1068-3	NCU00054	3	21.48	0.17		21.34	7.93	0.38	19.1	7.1	0.2		280.6	24.56		0.12	0.03
14668	Neurospora TF Circadian Clock - 2013Feb08CD	xc1087-1	NCU00445	3	21.75	0.25		22.03	8.78	0.18	19.97	7.97	0.23		82.3	29.04		0.28	0.08
14668	Neurospora TF Circadian Clock - 2013Feb08CD	xc1087-2	NCU00445	3	21.32	0.2		23.04	9.53	0.92	20.54	8.54	0.76		95.8	15.22		0.29	0.07
14668	Neurospora TF Circadian Clock - 2013Feb08CD	xc1087-3	NCU00445	3	21.23	0.47		23.34	9.78	0.78	20.81	8.81	0.52		67.69	25.79		0.27	0.07
14668	Neurospora TF Circadian Clock - 2013Feb08CD	xc1087-4	NCU00445	3	21.04	0.25		22.66	8.98	0.33	19.87	7.87	0.06		81.57	15.9		0.49	0.13
14668	Neurospora TF Circadian Clock - 2013Feb08CD	xc1078-1	NCU02326	3	21.07	0.48		21.93	8.26	1.27	19.23	7.23	0.7		63.59	12.27		0.27	0.08
14668	Neurospora TF Circadian Clock - 2013Feb08CD	xc1078-2	NCU02326	3	20.86	0.09		23.09	9.28	1.01	20.07	8.07	0.81		78.71	12.96		0.5	0.13
14668	Neurospora TF Circadian Clock - 2013Feb08CD	xc1078-3	NCU02326	3	21.17	0.14		21.13	7.53	0.57	18.63	6.63	0.38		76.2	17.19		0.29	0.1
14668	Neurospora TF Circadian Clock - 2013Feb08CD	xc1078-4	NCU02326	3	21.04	0.66		22.2	8.51	1.64	19.67	7.67	1.3		65.62	25.81		0.3	0.08
14668	Neurospora TF Circadian Clock - 2013Feb08CD	xc1060-1	NCU04001	3	23.35	0.88		18.49	6.16	0.82	17.97	5.97	0.31		76.16	5.29		0.4	0.09
14668	Neurospora TF Circadian Clock - 2013Feb08CD	xc1060-2	NCU04001	3	22.79	0.38		20.34	7.7	1.4	19.3	7.3	1.04		78.21	28.73		0.23	0.06
14668	Neurospora TF Circadian Clock - 2013Feb08CD	xc1060-3	NCU04001	3	22.8	0.33		19.38	6.75	1.11	18.4	6.4	0.78		76.19	11.59		0.34	0.09
14668	Neurospora TF Circadian Clock - 2013Feb08CD	xc1060-4	NCU04001	3	22.99	0.56		18.73	6.2	0.49	17.93	5.93	0.12		81.66	5.73		0.38	0.1
14668	Neurospora TF Circadian Clock - 2013Feb08CD	xc1060-5	NCU04001	3	22.58	0.19		21.63	8.88	3.66	20.4	8.4	3.38		81.47	13.23		0.4	0.12
14668	Neurospora TF Circadian Clock - 2013Feb08CD	xc1081-1	NCU06145	3	20.05	0.37		21.31	6.94	0.86	17.8	5.8	0.6		177.6	37.15		0.24	0.07
14668	Neurospora TF Circadian Clock - 2013Feb08CD	xc1081-2	NCU06145	3	19.99	0.19		20.93	6.52	0.38	17.43	5.43	0.15		135.3	30.85		0.14	0.04
14668	Neurospora TF Circadian Clock - 2013Feb08CD	xc1081-3	NCU06145	3	20.22	0.12		20.14	5.9	0.84	16.97	4.97	0.68		165.6	56.35		0.11	0.04
14668	Neurospora TF Circadian Clock - 2013Feb08CD	xc1067-1	NCU08042	3	21.27	0.07		22.42	8.88	0.49	19.87	7.87	0.49		43.11	13.82		0.4	0.11
14668	Neurospora TF Circadian Clock - 2013Feb08CD	xc1067-2	NCU08042	3	22.52	0.07		19.68	6.9	0.11	18.47	6.47	0.06		71.65	5		0.39	0.09
14668	Neurospora TF Circadian Clock - 2013Feb08CD	xc1067-3	NCU08042	3	21.51	0.24		21.61	8.22	0.6	19.37	7.37	0.32		46.42	14.78		0.32	0.08
14668	Neurospora TF Circadian Clock - 2013Feb08CD	xc1067-4	NCU08042	3	21.32	0.11		22.21	8.7	0.22	19.73	7.73	0.21		39.51	11.55		0.35	0.09
14668	Neurospora TF Circadian Clock - 2013Feb08CD	xc1067-5	NCU08042	3	21.11	0.07		22.36	8.72	0.77	19.67	7.67	0.65		45.3	9.81		0.34	0.09
14668	Neurospora TF Circadian Clock - 2013Feb08CD	xc1067-6	NCU08042	3	21.09	0.17		22.61	8.96	0.46	19.87	7.87	0.25		43.82	1.06		0.38	0.09
14668	Neurospora TF Circadian Clock - 2013Feb08CD	xc1067-7	NCU08042	3	21.15	0.1		21.71	8.09	0.37	19.13	7.13	0.4		63.01	9.92		0.34	0.1
14668	Neurospora TF Circadian Clock - 2013Feb08CD	xc1067-8	NCU08042	3	21.69	0.25		20.99	7.71	0.11	18.97	6.97	0.31		237	36.28		0.18	0.04
14668	Neurospora TF Circadian Clock - 2013Feb08CD	xc1062-1	NCU08848	3	20.89	0.15		23.02	9.24	0.31	20.03	8.03	0.21		45.69	11.85		0.37	0.1
14668	Neurospora TF Circadian Clock - 2013Feb08CD	xc1062-2	NCU08848	3	21.03	0.08		21.69	8	0.87	19	7	0.7		68.31	16.28		0.34	0.1
14668	Neurospora TF Circadian Clock - 2013Feb08CD	xc1062-3	NCU08848	3	21.48	1.32		22.08	8.67	3.67	20.14	8.14	2.84		37.5	24.5		0.42	0.11
14668	Neurospora TF Circadian Clock - 2013Feb08CD	xc1062-4	NCU08848	3	20.73	0.43		23.52	9.63	1.01	20.43	8.43	0.65		47.89	16.43		0.39	0.09
14668	Neurospora TF Circadian Clock - 2013Feb08CD	xc1062-5	NCU08848	3	20.8	0.16		22.76	8.92	0.49	19.73	7.73	0.51		51.88	6.4		0.44	0.14
14668	Neurospora TF Circadian Clock - 2013Feb08CD	xc1063-1	NCU08901	3	21.53	0.24		21.37	7.99	0.79	19.17	7.17	0.5		74.81	6.44		0.34	0.08
14668	Neurospora TF Circadian Clock - 2013Feb08CD	xc1063-2	NCU08901	3	22.04	0.08		22.11	9.04	0.41	20.3	8.3	0.44		154.2	32.58		0.22	0.04
14668	Neurospora TF Circadian Clock - 2013Feb08CD	xc1063-3	NCU08901	3	21.48	0.26		22.57	9.16	0.51	20.2	8.2	0.3		41.2	9.24		0.41	0.09
14668	Neurospora TF Circadian Clock - 2013Feb08CD	xc1065-1	NCU09915	3	20.89	0.18		23.14	9.35	0.74	20.13	8.13	0.47		40.12	9.18		0.37	0.12
14668	Neurospora TF Circadian Clock - 2013Feb08CD	xc1065-2	NCU09915	3	20.79	0.37		0.06	10.2	0.82	0.18	8.97	0.49		54.2	2.47		0.35	0.1
14668	Neurospora TF Circadian Clock - 2013Feb08CD	xc1065-3	NCU09915	3	21.11	0.26		21.72	8.07	0.15	19.1	7.1	0.1		50.84	2.89		0.24	0.08
14668	Neurospora TF Circadian Clock - 2013Feb08CD	x661-4	WT	9	22.12	0.21		20.36	7.35	0.47	18.76	6.76	0.32		94.63	18.09		0.25	0.06
14668	Neurospora TF Circadian Clock - 2013Feb08CD	x661-5	WT	9	21.74	0.27		20.83	7.58	0.51	18.87	6.87	0.27		102.7	9.29		0.25	0.06
14686	Neurospora TF Circadian Clock - 2013Feb15CD	xc531-1	NCU05051	3	21.49	0.24		21.18	7.77	0.8	18.97	6.97	0.51		127.8	26.6		0.28	0.07
14686	Neurospora TF Circadian Clock - 2013Feb15CD	xc531-3	NCU05051	3	21.49	0.19		21.22	7.82	0.94	19	7	0.78		106.3	14.3		0.36	0.08
14686	Neurospora TF Circadian Clock - 2013Feb15CD	xc531-4	NCU05051	2	21.59	0.42		20.91	7.57	1.51	18.8	6.8	0.99		91.96	20		0.34	0.1
14686	Neurospora TF Circadian Clock - 2013Feb15CD	xc531-5	NCU05051	3	21.89	0.07		20.13	6.97	0.22	18.37	6.37	0.25		142.3	10.92		0.3	0.07
14686	Neurospora TF Circadian Clock - 2013Feb15CD	xc531-6	NCU05051	3	21.76	0.17		20.11	6.87	0.28	18.23	6.23	0.21		183.3	6.4		0.29	0.07
14686	Neurospora TF Circadian Clock - 2013Feb15CD	xc426-1	NCU05064	3	21.44	0.22		19.78	6.35	0.79	17.67	5.67	0.55		118	18.22		0.21	0.05
14686	Neurospora TF Circadian Clock - 2013Feb15CD	xc426-2	NCU05064	3	21.51	0.1		20.2	6.81	0.19	18.1	6.1	0.2		133.8	21.31		0.23	0.05
14686	Neurospora TF Circadian Clock - 2013Feb15CD	xc426-3	NCU05064	3	21.19	0.22		20.16	6.57	0.73	17.8	5.8	0.46		214.4	52.38		0.26	0.06
14686	Neurospora TF Circadian Clock - 2013Feb15CD	xc426-4	NCU05064	3	21.53	0.22		20.25	6.88	0.25	18.17	6.17	0.06		176.3	14.89		0.3	0.06
14686	Neurospora TF Circadian Clock - 2013Feb15CD	xc421-1	NCU09576	3	21.33	0.16		22.95	9.45	0.41	20.4	8.4	0.26		233.5	4.36		0.14	0.04
14686	Neurospora TF Circadian Clock - 2013Feb15CD	xc421-2	NCU09576	3	20.66	0.04		23.35	9.41	0.09	20.1	8.1	0.1		282.3	25.27		0.22	0.05
14686	Neurospora TF Circadian Clock - 2013Feb15CD	xc421-3	NCU09576	3	21.28	0.75		23.01	9.47	0.19	20.4	8.4	0.89		177.9	37.85		0.17	0.04
14686	Neurospora TF Circadian Clock - 2013Feb15CD	x661-4	WT	6	21.62	0.19		20.59	7.27	0.26	18.55	6.55	0.27		122.8	35.01		0.28	0.07
14686	Neurospora TF Circadian Clock - 2013Feb15CD	x661-5	WT	6	21.67	0.1		20.27	6.98	0.61	18.3	6.3	0.53		123.2	8.64		0.27	0.07
14673	Neurospora TF Circadian Clock - 2013Mar08CD	xc1077-1	NCU01145	3	21.56	0.25		22.74	9.38	0.42	20.43	8.43	0.28		67.77	5.96		0.33	0.08
14673	Neurospora TF Circadian Clock - 2013Mar08CD	xc1077-2	NCU01145	3	21.93	0.17		21.75	8.61	0.48	19.87	7.87	0.29		59.5	2.97		0.43	0.1
14673	Neurospora TF Circadian Clock - 2013Mar08CD	xc1077-3	NCU01145	3	21.99	0.17		21.01	7.91	0.53	19.25	7.25	0.36		67.84	6.23		0.29	0.07
14673	Neurospora TF Circadian Clock - 2013Mar08CD	xc1077-4	NCU01145	3	21.71	0.15		22.09	8.82	0.12	19.98	7.98	0.19		125.7	23.81		0.25	0.06
14673	Neurospora TF Circadian Clock - 2013Mar08CD	xc1077-5	NCU01145	3	21.92	0.31		21.43	8.29	0.79	19.57	7.57	0.5		85.76	3.17		0.27	0.06
14673	Neurospora TF Circadian Clock - 2013Mar08CD	xc1093-1	NCU05022	3	20.99	0.12		22.63	8.91	0.84	19.79	7.79	0.65		49.22	6.51		0.38	0.1
14673	Neurospora TF Circadian Clock - 2013Mar08CD	xc1093-2	NCU05022	3	21.51	0.04		22.21	8.83	0.3	19.91	7.91	0.26		63.25	8.86		0.31	0.07
14673	Neurospora TF Circadian Clock - 2013Mar08CD	xc1093-3	NCU05022	3	22.24	0.15		20.07	7.12	0.15	18.6	6.6	0.03		132.7	6.2		0.29	0.06
14673	Neurospora TF Circadian Clock - 2013Mar08CD	xc1093-4	NCU05022	3	21.24	0.24		21.86	8.31	0.14	19.35	7.35	0.24		88.69	11.07		0.31	0.07
14673	Neurospora TF Circadian Clock - 2013Mar08CD	xc1093-5	NCU05022	3	21.2	0.07		22.38	8.8	0.35	19.77	7.77	0.36		46.45	12.09		0.36	0.09
14673	Neurospora TF Circadian Clock - 2013Mar08CD	xc1092-1	NCU05996	3	21.26	0.5		22.59	9.04	1.2	19.99	7.99	0.61		131.7	59.86		0.22	0.05
14673	Neurospora TF Circadian Clock - 2013Mar08CD	xc1092-2	NCU05996	3	21.93	0.12		20.42	7.29	0.6	18.65	6.65	0.45		159.9	6.31		0.27	0.07
14673	Neurospora TF Circadian Clock - 2013Mar08CD	xc1092-3	NCU05996	3	22.03	0.23		20.4	7.33	0.96	18.72	6.72	0.69		137	16.19		0.23	0.06
14673	Neurospora TF Circadian Clock - 2013Mar08CD	xc1092-4	NCU05996	3	22.04	0.31		19.83	6.76	0.41	18.2	6.2	0.14		111.2	19.8		0.25	0.07
14673	Neurospora TF Circadian Clock - 2013Mar08CD	xc1092-5	NCU05996	3	22.03	0.41		20.69	7.62	0.94	18.98	6.98	0.55		129.3	31.46		0.2	0.06
14673	Neurospora TF Circadian Clock - 2013Mar08CD	xc1092-6	NCU05996	3	21.27	0.08		21.82	8.28	0.59	19.34	7.34	0.52		162.1	20.33		0.24	0.05
14673	Neurospora TF Circadian Clock - 2013Mar08CD	xc1092-7	NCU05996	3	20.96	0.29		22.4	8.66	0.93	19.56	7.56	0.56		103.7	17.45		0.17	0.05
14673	Neurospora TF Circadian Clock - 2013Mar08CD	xc927-1	NCU06028	3	21.72	0.58		21.55	8.29	1.53	19.48	7.48	0.87		80.42	19.06		0.36	0.08
14673	Neurospora TF Circadian Clock - 2013Mar08CD	xc927-2	NCU06028	3	22.2	0.17		21.05	8.08	0.1	19.47	7.47	0.23		72.81	10.75		0.34	0.08
14673	Neurospora TF Circadian Clock - 2013Mar08CD	xc927-3	NCU06028	3	21.9	0.27		22.17	9.02	0.78	20.23	8.23	0.52		93.84	26.18		0.36	0.09
14673	Neurospora TF Circadian Clock - 2013Mar08CD	xc927-4	NCU06028	3	22.36	0.15		20.31	7.43	0.61	18.93	6.93	0.46		90.75	12.67		0.31	0.07
14673	Neurospora TF Circadian Clock - 2013Mar08CD	xc1095-1	NCU07587	3	21.91	0.36		23.13	9.99	0.48	21.11	9.11	0.21		37.19	23.48		0.37	0.11
14673	Neurospora TF Circadian Clock - 2013Mar08CD	xc1095-2	NCU07587	3	22.3	0.21		22.47	9.56	0.5	20.88	8.88	0.3		65.84	20.07		0.33	0.07
14673	Neurospora TF Circadian Clock - 2013Mar08CD	xc1095-3	NCU07587	3	22.24	0.11		22.41	9.46	0.32	20.76	8.76	0.2		43.94	8.43		0.35	0.07
14673	Neurospora TF Circadian Clock - 2013Mar08CD	xc1095-4	NCU07587	3	21.95	0.27		23.01	9.88	0.28	21.05	9.05	0.17		46.68	8.38		0.44	0.12
14673	Neurospora TF Circadian Clock - 2013Mar08CD	xc1095-5	NCU07587	3	22.21	0.62		22.56	9.6	1.98	21.08	9.08	1.64		46.29	17.83		0.38	0.11
14673	Neurospora TF Circadian Clock - 2013Mar08CD	xc1064-1	NCU08063	3	22.09	0.09		20.88	7.84	0.28	19.22	7.22	0.18		100.7	30.12		0.27	0.07
14673	Neurospora TF Circadian Clock - 2013Mar08CD	xc1064-2	NCU08063	3	22.28	0.23		19.92	6.99	0.1	18.5	6.5	0.29		90.97	18.12		0.22	0.06
14673	Neurospora TF Circadian Clock - 2013Mar08CD	xc1064-3	NCU08063	3	21.71	0.27		21.94	8.68	0.56	19.84	7.84	0.29		82.15	11.82		0.4	0.1
14673	Neurospora TF Circadian Clock - 2013Mar08CD	xc1064-4	NCU08063	3	21.82	0.1		21.74	8.55	0.29	19.77	7.77	0.17		72.63	11.76		0.51	0.12
14673	Neurospora TF Circadian Clock - 2013Mar08CD	xc1064-5	NCU08063	3	22.5	0.23		19.62	6.82	0.52	18.38	6.38	0.31		84.25	22.4		0.26	0.06
14673	Neurospora TF Circadian Clock - 2013Mar08CD	x661-108	WT	6	22.22	0.24		20.45	7.49	0.5	18.93	6.93	0.33		75.13	17.85		0.26	0.06
14673	Neurospora TF Circadian Clock - 2013Mar08CD	x661-4	WT	6	22.27	0.22		20.46	7.53	0.63	18.99	6.99	0.49		106.5	11.7		0.28	0.07
14673	Neurospora TF Circadian Clock - 2013Mar08CD	x661-5	WT	6	21.82	0.35		20.9	7.7	1.1	18.99	6.99	0.72		116.1	23.21		0.29	0.07
14672	Neurospora TF Circadian Clock - 2013Mar22CE	xc453-1	NCU03043	3	22.2	0.24		22.3	9.33	1.1	20.63	8.63	1.14		93.71	28.89		0.24	0.07
14672	Neurospora TF Circadian Clock - 2013Mar22CE	xc453-2	NCU03043	3	21.19	0.28		22.32	8.73	0.34	19.7	7.7	0.17		95.19	15.89		0.29	0.09
14672	Neurospora TF Circadian Clock - 2013Mar22CE	xc453-3	NCU03043	3	21.34	0.06		22.34	8.84	0.33	19.87	7.87	0.25		70.74	20.64		0.27	0.08
14672	Neurospora TF Circadian Clock - 2013Mar22CE	xc453-4	NCU03043	3	21.62	0.21		22.43	9.11	0.74	20.2	8.2	0.62		71.8	10.42		0.33	0.09
14672	Neurospora TF Circadian Clock - 2013Mar22CE	xc450-1	NCU04050	3	21.93	0.03		22.44	9.3	0.64	20.5	8.5	0.56		128.1	49.98		0.26	0.09
14672	Neurospora TF Circadian Clock - 2013Mar22CE	xc450-2	NCU04050	3	21.81	0.18		22.37	9.17	0.72	20.33	8.33	0.7		77.47	24.1		0.25	0.07
14672	Neurospora TF Circadian Clock - 2013Mar22CE	xc450-3	NCU04050	3	21.51	0.11		22.65	9.26	0.59	20.3	8.3	0.44		81.47	4.26		0.25	0.07
14672	Neurospora TF Circadian Clock - 2013Mar22CE	xc450-4	NCU04050	3	21.32	0.04		23.86	10.36	0.53	21.18	9.18	0.48		79.28	20.64		0.16	0.05
14672	Neurospora TF Circadian Clock - 2013Mar22CE	xc1100-1	NCU04079	3	21.18	0.2		22.4	8.8	0.87	19.77	7.77	0.59		91.22	4.96		0.37	0.1
14672	Neurospora TF Circadian Clock - 2013Mar22CE	xc1100-2	NCU04079	3	20.99	0.18		23.56	9.84	1.01	20.61	8.61	0.77		51.66	6.51		0.56	0.16
14672	Neurospora TF Circadian Clock - 2013Mar22CE	xc1100-3	NCU04079	3	21.97	0.12		20.5	7.4	0.21	18.77	6.77	0.15		85.36	21.57		0.3	0.07
14672	Neurospora TF Circadian Clock - 2013Mar22CE	xc1100-4	NCU04079	3	22.16	0.4		20.02	7.03	1.53	18.47	6.47	1.07		85.16	4.11		0.2	0.05
14672	Neurospora TF Circadian Clock - 2013Mar22CE	xc1100-5	NCU04079	3	21.85	0.09		20.61	7.43	0.08	18.77	6.77	0.15		103	7.64		0.23	0.05
14672	Neurospora TF Circadian Clock - 2013Mar22CE	xc1100-6	NCU04079	3	21.47	0.72		21.86	8.45	1.13	19.53	7.53	0.51		61.68	10.78		0.27	0.08
14672	Neurospora TF Circadian Clock - 2013Mar22CE	xc1091-1	NCU04663	3	21.74	0.21		20.94	7.69	0.87	18.97	6.97	0.71		171.7	53.82		0.2	0.06
14672	Neurospora TF Circadian Clock - 2013Mar22CE	xc1091-2	NCU04663	3	21.98	0.16		20.35	7.25	0.36	18.63	6.63	0.21		229.5	0.47		0.19	0.05
14672	Neurospora TF Circadian Clock - 2013Mar22CE	xc1091-3	NCU04663	3	22.25	0.14		20.5	7.56	0.09	19	7	0.17		130.2	26		0.24	0.06
14672	Neurospora TF Circadian Clock - 2013Mar22CE	xc1091-4	NCU04663	3	21.78	0.13		21.16	7.93	0.73	19.2	7.2	0.62		188.5	24.66		0.22	0.05
14672	Neurospora TF Circadian Clock - 2013Mar22CE	xc1099-1	NCU08527	3	22.37	0.17		19.96	7.08	0.14	18.6	6.6	0.26		72.7	14.68		0.22	0.06
14672	Neurospora TF Circadian Clock - 2013Mar22CE	xc1099-2	NCU08527	3	21.27	0.35		22.87	9.33	0.61	20.27	8.27	0.42		59.22	13.14		0.36	0.1
14672	Neurospora TF Circadian Clock - 2013Mar22CE	xc1099-3	NCU08527	3	21.01	0.21		23.11	9.4	0.31	20.23	8.23	0.46		78.41	4.7		0.45	0.12
14672	Neurospora TF Circadian Clock - 2013Mar22CE	xc1099-4	NCU08527	3	21.68	0.68		21.94	8.66	1.07	19.8	7.8	0.44		45.6	23.2		0.42	0.1
14672	Neurospora TF Circadian Clock - 2013Mar22CE	xc1099-5	NCU08527	3	21.36	0.24		21.99	8.51	0.53	19.57	7.57	0.65		60.38	7.66		0.27	0.08
14672	Neurospora TF Circadian Clock - 2013Mar22CE	xc1099-6	NCU08527	3	21.51	0.44		22.85	9.46	1.19	20.63	8.63	0.95		55.82	22.42		0.38	0.08
14672	Neurospora TF Circadian Clock - 2013Mar22CE	xc435-1	NCU09615	3	21.6	0.12		22.19	8.86	0.48	19.97	7.97	0.32		78.13	22.4		0.38	0.09
14672	Neurospora TF Circadian Clock - 2013Mar22CE	xc435-2	NCU09615	3	21.24	0.37		22.31	8.75	0.91	19.73	7.73	0.47		84.65	17.92		0.24	0.06
14672	Neurospora TF Circadian Clock - 2013Mar22CE	xc435-3	NCU09615	3	21.72	0.07		21.11	7.85	0.37	19.1	7.1	0.3		86.93	13.09		0.28	0.06
14672	Neurospora TF Circadian Clock - 2013Mar22CE	xc435-4	NCU09615	3	21.29	0.11		23.07	9.55	0.69	20.47	8.47	0.64		52	11.7		0.25	0.06
14672	Neurospora TF Circadian Clock - 2013Mar22CE	xc435-5	NCU09615	3	21.22	0.31		23.09	9.52	1.11	20.4	8.4	0.7		65.4	11.94		0.29	0.06
14672	Neurospora TF Circadian Clock - 2013Mar22CE	x661-4	WT	6	22.09	0.28		20.27	7.24	0.64	18.65	6.65	0.36		72.42	13.08		0.24	0.06
14672	Neurospora TF Circadian Clock - 2013Mar22CE	x661-5	WT	6	21.74	0.17		20.18	6.93	0.32	18.28	6.28	0.31		103.8	17.86		0.22	0.05
14685	Neurospora TF Circadian Clock - 2013Nov29AB	xc430-1	NCU00329	3	21.91	0.05		20.7	7.56	0.25	18.9	6.9	0.26		186.3	46.36		0.29	0.07
14685	Neurospora TF Circadian Clock - 2013Nov29AB	xc430-2	NCU00329	3	21.69	0.13		21.21	7.93	0.33	19.17	7.17	0.25		186.5	28.97		0.29	0.07
14685	Neurospora TF Circadian Clock - 2013Nov29AB	xc430-3	NCU00329	3	21.8	0.11		20.66	7.45	0.2	18.77	6.77	0.15		179.6	22.42		0.32	0.09
14685	Neurospora TF Circadian Clock - 2013Nov29AB	xc430-4	NCU00329	3	21.53	0.04		20.85	7.47	0.59	18.7	6.7	0.5		222	31.72		0.27	0.06
14685	Neurospora TF Circadian Clock - 2013Nov29AB	xc430-5	NCU00329	3	21.68	0.18		20.85	7.56	0.44	18.83	6.83	0.29		209.1	70.61		0.35	0.08
14685	Neurospora TF Circadian Clock - 2013Nov29AB	xc430-7	NCU00329	3	21.57	0.02		21.11	7.76	0.18	18.97	6.97	0.15		165.6	41.49		0.36	0.1
14685	Neurospora TF Circadian Clock - 2013Nov29AB	xc430-8	NCU00329	3	21.9	0.13		20.53	7.38	0.05	18.73	6.73	0.15		172.2	20.25		0.31	0.08
14685	Neurospora TF Circadian Clock - 2013Nov29AB	xc430-9	NCU00329	3	21.89	0.25		20.21	7.05	0.55	18.43	6.43	0.32		194.3	46.31		0.26	0.08
14685	Neurospora TF Circadian Clock - 2013Nov29AB	xc621-1	NCU01478	3	21.65	0.11		21.18	7.88	0.64	19.1	7.1	0.5		191.9	11.05		0.23	0.06
14685	Neurospora TF Circadian Clock - 2013Nov29AB	xc621-2	NCU01478	3	21.62	0.25		20.87	7.55	0.62	18.8	6.8	0.36		210.3	19.13		0.23	0.06
14685	Neurospora TF Circadian Clock - 2013Nov29AB	xc621-3	NCU01478	3	21.56	0.19		21.34	7.98	0.44	19.17	7.17	0.35		140.4	45.23		0.39	0.11
14685	Neurospora TF Circadian Clock - 2013Nov29AB	xc621-4	NCU01478	3	21.76	0.17		20.81	7.58	0.35	18.87	6.87	0.21		152.5	23.02		0.33	0.09
14685	Neurospora TF Circadian Clock - 2013Nov29AB	xc621-5	NCU01478	3	21.56	0.31		21.08	7.73	0.58	18.93	6.93	0.25		221.8	23.51		0.28	0.07
14685	Neurospora TF Circadian Clock - 2013Nov29AB	xc929-1	NCU05411	3	21.36	0.26		21.92	8.44	0.85	19.5	7.5	0.53		119.1	11.92		0.39	0.11
14685	Neurospora TF Circadian Clock - 2013Nov29AB	xc929-2	NCU05411	3	21.21	0.14		22.33	8.75	0.43	19.73	7.73	0.25		122.8	44.53		0.47	0.1
14685	Neurospora TF Circadian Clock - 2013Nov29AB	xc929-3	NCU05411	3	21.33	0.16		22.09	8.59	0.39	19.63	7.63	0.21		127.4	36.37		0.45	0.12
14685	Neurospora TF Circadian Clock - 2013Nov29AB	xc929-4	NCU05411	2	21.33	0.01		22.22	8.72	0.06	19.75	7.75	0.07		127.5	40.98		0.45	0.1
14685	Neurospora TF Circadian Clock - 2013Nov29AB	xc929-5	NCU05411	3	21.47	0.23		21.65	8.24	0.42	19.37	7.37	0.21		132.2	9.75		0.33	0.09
14685	Neurospora TF Circadian Clock - 2013Nov29AB	xc926-1	NCU05536	3	21.96	0.19		20.4	7.29	0.47	18.67	6.67	0.59		159.8	25.2		0.2	0.06
14685	Neurospora TF Circadian Clock - 2013Nov29AB	xc926-2	NCU05536	3	21.27	0.4		21.4	7.86	0.24	18.97	6.97	0.4		92.79	10.06		0.26	0.09
14685	Neurospora TF Circadian Clock - 2013Nov29AB	xc926-3	NCU05536	3	21.44	0.07		22.35	8.92	0.43	19.97	7.97	0.4		72.32	11.81		0.35	0.09
14685	Neurospora TF Circadian Clock - 2013Nov29AB	xc926-4	NCU05536	3	21.72	0.06		21.88	8.62	0.06	19.8	7.8	0.1		136.9	15.41		0.26	0.08
14685	Neurospora TF Circadian Clock - 2013Nov29AB	xc926-5	NCU05536	3	21.45	0.01		21.29	7.87	0.13	19.03	7.03	0.12		148.7	11.13		0.27	0.07
14685	Neurospora TF Circadian Clock - 2013Nov29AB	xc926-6	NCU05536	3	21.68	0.16		21.45	8.17	0.6	19.37	7.37	0.4		177.5	30.27		0.26	0.07
14685	Neurospora TF Circadian Clock - 2013Nov29AB	x661-100	WT	12	21.77	0.16		21.13	7.9	0.65	19.16	7.16	0.5		129.2	24.23		0.27	0.07
14685	Neurospora TF Circadian Clock - 2013Nov29AB	x661-10106	WT	3	21.57	0.08		20.58	7.23	0.53	18.5	6.5	0.46		156	11.63		0.28	0.07
14685	Neurospora TF Circadian Clock - 2013Nov29AB	x661-106	WT	9	21.48	0.14		21.08	7.68	0.45	18.87	6.87	0.35		131	31.13		0.26	0.07
14685	Neurospora TF Circadian Clock - 2013Nov29AB	x661-4	WT	12	21.69	0.32		20.4	7.13	0.64	18.43	6.43	0.61		128.8	45.57		0.28	0.07
14685	Neurospora TF Circadian Clock - 2013Nov29AB	x661-5	WT	12	21.56	0.13		20.9	7.55	0.56	18.77	6.77	0.53		157.3	51.45		0.29	0.07
14679	Neurospora TF Circadian Clock - 2013Oct29DE	xc686-1	NCU02214	2	21.75	0.14		20.47	7.23	0.68	18.55	6.55	0.49		140.9	2.9		0.38	0.11
14679	Neurospora TF Circadian Clock - 2013Oct29DE	xc686-2	NCU02214	3	21.9	0.15		21.55	8.39	0.52	19.67	7.67	0.5		136.6	38.45		0.21	0.06
14679	Neurospora TF Circadian Clock - 2013Oct29DE	xc686-3	NCU02214	3	21.88	0.47		20.71	7.55	1.16	18.87	6.87	0.67		136.8	31.43		0.29	0.09
14679	Neurospora TF Circadian Clock - 2013Oct29DE	xc686-4	NCU02214	3	21.88	0.15		20.95	7.79	0.28	19.1	7.1	0.2		181.7	16.98		0.32	0.08
14679	Neurospora TF Circadian Clock - 2013Oct29DE	xc686-5	NCU02214	3	22.1	0.15		20.13	7.1	0.4	18.53	6.53	0.25		143.3	43.63		0.27	0.07
14679	Neurospora TF Circadian Clock - 2013Oct29DE	xc687-1	NCU02896	3	21.93	0.03		20.9	7.77	0.31	19.1	7.1	0.26		137	25.29		0.27	0.07
14679	Neurospora TF Circadian Clock - 2013Oct29DE	xc687-2	NCU02896	3	22.17	0.43		21.59	8.6	0.63	19.93	7.93	0.21		224.5	182.8		0.25	0.08
14679	Neurospora TF Circadian Clock - 2013Oct29DE	xc687-3	NCU02896	3	21.75	0.13		22.92	9.68	0.58	20.77	8.77	0.4		354.3	54.97		0.17	0.05
14679	Neurospora TF Circadian Clock - 2013Oct29DE	xc687-4	NCU02896	3	21.71	0.1		22.59	9.32	0.43	20.43	8.43	0.31		309	37.51		0.17	0.05
14679	Neurospora TF Circadian Clock - 2013Oct29DE	xc690-1	NCU03489	3	21.48	0.15		20.93	7.52	0.47	18.73	6.73	0.31		80.3	9.58		0.45	0.12
14679	Neurospora TF Circadian Clock - 2013Oct29DE	xc690-2	NCU03489	3	22.02	0.3		21.36	8.28	0.37	19.6	7.6	0.61		128.7	36.23		0.23	0.07
14679	Neurospora TF Circadian Clock - 2013Oct29DE	xc690-4	NCU03489	3	21.9	0.11		21.15	8	1.08	19.3	7.3	1.08		123.3	37.25		0.32	0.08
14679	Neurospora TF Circadian Clock - 2013Oct29DE	xc690-5	NCU03489	3	21.88	0.09		22.85	9.69	0.23	20.83	8.83	0.29		342.2	78.92		0.21	0.06
14679	Neurospora TF Circadian Clock - 2013Oct29DE	xc429-1	NCU04295	3	21.79	0.42		21.09	7.88	1.34	19.13	7.13	0.85		240.9	93.34		0.37	0.09
14679	Neurospora TF Circadian Clock - 2013Oct29DE	xc429-2	NCU04295	3	21.73	0.14		22.27	9.01	0.4	20.17	8.17	0.25		248.2	19.71		0.28	0.07
14679	Neurospora TF Circadian Clock - 2013Oct29DE	xc429-3	NCU04295	3	22.03	0.25		20.7	7.63	0.69	19	7	0.44		220	90.54		0.32	0.09
14679	Neurospora TF Circadian Clock - 2013Oct29DE	xc429-4	NCU04295	3	21.73	0.57		21.57	8.32	2.4	19.69	7.69	2		175	64.05		0.37	0.1
14679	Neurospora TF Circadian Clock - 2013Oct29DE	xc428-1	NCU05308	3	21.44	0.22		21.35	7.91	0.67	19.07	7.07	0.42		128.7	19.19		0.44	0.12
14679	Neurospora TF Circadian Clock - 2013Oct29DE	xc428-2	NCU05308	3	21.94	0.18		21.3	8.17	0.45	19.47	7.47	0.29		190	28.79		0.27	0.08
14679	Neurospora TF Circadian Clock - 2013Oct29DE	xc428-3	NCU05308	3	21.5	0.21		21.43	8.04	0.41	19.2	7.2	0.26		193.5	26.85		0.38	0.11
14679	Neurospora TF Circadian Clock - 2013Oct29DE	xc428-4	NCU05308	3	21.95	0.19		20.63	7.51	0.8	18.87	6.87	0.57		320.4	46.38		0.27	0.07
14679	Neurospora TF Circadian Clock - 2013Oct29DE	xc1097-1	NCU07575	3	21.76	0.08		20.89	7.65	0.52	18.93	6.93	0.4		164.6	63.25		0.33	0.08
14679	Neurospora TF Circadian Clock - 2013Oct29DE	xc1097-2	NCU07575	3	21.91	0.13		21.4	8.26	0.45	19.53	7.53	0.4		180.6	85.33		0.3	0.09
14679	Neurospora TF Circadian Clock - 2013Oct29DE	xc1097-3	NCU07575	3	21.71	0.17		22.22	8.95	0.53	20.1	8.1	0.36		196.9	15.39		0.3	0.07
14679	Neurospora TF Circadian Clock - 2013Oct29DE	xc1097-4	NCU07575	3	21.67	0.12		22.19	8.9	0.52	20.03	8.03	0.35		209.6	17.13		0.33	0.08
14679	Neurospora TF Circadian Clock - 2013Oct29DE	xc1097-5	NCU07575	3	21.83	0.08		21.11	7.92	0.85	19.2	7.2	0.72		232.2	31.22		0.26	0.07
14679	Neurospora TF Circadian Clock - 2013Oct29DE	xc415-1	NCU08891	3	22.1	0.04		20.89	7.86	0.5	19.23	7.23	0.49		251.5	57.56		0.25	0.07
14679	Neurospora TF Circadian Clock - 2013Oct29DE	xc415-2	NCU08891	3	22	0.12		20.77	7.68	0.89	19.03	7.03	0.72		351.2	77.49		0.26	0.06
14679	Neurospora TF Circadian Clock - 2013Oct29DE	xc415-3	NCU08891	3	21.7	0.46		22.04	8.77	1.64	19.9	7.9	1.05		168.4	79.9		0.22	0.06
14679	Neurospora TF Circadian Clock - 2013Oct29DE	xc415-4	NCU08891	3	21.87	0.14		21.28	8.11	0.53	19.4	7.4	0.61		205.1	46.32		0.31	0.07
14679	Neurospora TF Circadian Clock - 2013Oct29DE	xc415-5	NCU08891	3	21.88	0.18		20.7	7.54	0.88	18.87	6.87	0.65		165.1	23.47		0.37	0.1
14679	Neurospora TF Circadian Clock - 2013Oct29DE	xc415-6	NCU08891	3	21.7	0.11		21.5	8.23	0.75	19.43	7.43	0.59		268.4	41.89		0.28	0.07
14679	Neurospora TF Circadian Clock - 2013Oct29DE	xc415-7	NCU08891	3	21.3	0.17		21.9	8.38	0.85	19.43	7.43	0.64		126.9	24.07		0.4	0.1
14679	Neurospora TF Circadian Clock - 2013Oct29DE	x661-100	WT	6	21.81	0.5		20.81	7.6	1.43	18.88	6.88	0.87		190.4	76.13		0.28	0.07
14679	Neurospora TF Circadian Clock - 2013Oct29DE	x661-102	WT	6	21.85	0.22		21.18	8	0.63	19.28	7.28	0.51		203.2	31.84		0.32	0.08
14679	Neurospora TF Circadian Clock - 2013Oct29DE	x661-104	WT	6	22.32	0.36		22.24	9.33	0.46	20.68	8.68	0.41		147.2	38.79		0.38	0.11
14679	Neurospora TF Circadian Clock - 2013Oct29DE	x661-106	WT	6	21.74	0.13		20.05	6.8	0.34	18.17	6.17	0.28		152.9	39.34		0.29	0.07
14679	Neurospora TF Circadian Clock - 2013Oct29DE	x661-108	WT	6	21.91	0.12		20.6	7.46	0.4	18.8	6.8	0.27		207.7	53.57		0.24	0.06
14679	Neurospora TF Circadian Clock - 2013Oct29DE	x661-4	WT	9	21.92	0.16		19.46	6.32	0.42	17.78	5.78	0.3		134.8	45.13		0.27	0.06
14679	Neurospora TF Circadian Clock - 2013Oct29DE	x661-5	WT	9	21.66	0.17		19.79	6.49	0.45	17.86	5.86	0.38		157.1	30.13		0.31	0.08
14666	Neurospora TF Circadian Clock - 2014Jan03EF	xc689-1	NCU00289	3	21.7	0.16		20.1	6.82	1.03	18.17	6.17	0.85		74.01	9.76		0.32	0.07
14666	Neurospora TF Circadian Clock - 2014Jan03EF	xc689-2	NCU00289	3	21.76	0.27		20.16	6.93	1.07	18.27	6.27	0.76		95.61	11.32		0.25	0.06
14666	Neurospora TF Circadian Clock - 2014Jan03EF	xc689-3	NCU00289	3	21.78	0.1		20.17	6.94	0.75	18.3	6.3	0.62		131.1	48.51		0.29	0.06
14666	Neurospora TF Circadian Clock - 2014Jan03EF	xc689-4	NCU00289	3	21.61	0.08		20.17	6.84	0.33	18.17	6.17	0.31		128.4	25.36		0.22	0.05
14666	Neurospora TF Circadian Clock - 2014Jan03EF	xc537-1	NCU00499	3	20.73	0.1		21.96	8.07	0.35	18.97	6.97	0.23		149.9	14.38		0.29	0.06
14666	Neurospora TF Circadian Clock - 2014Jan03EF	xc537-2	NCU00499	3	20.68	0.12		22.33	8.4	0.19	19.23	7.23	0.15		167.4	12.88		0.28	0.06
14666	Neurospora TF Circadian Clock - 2014Jan03EF	xc537-3	NCU00499	3	20.83	0.12		21.74	7.92	0.64	18.87	6.87	0.45		188.9	36.38		0.29	0.06
14666	Neurospora TF Circadian Clock - 2014Jan03EF	xc537-4	NCU00499	3	20.87	0.22		21.82	8.02	0.28	18.97	6.97	0.15		218.6	53.75		0.28	0.06
14666	Neurospora TF Circadian Clock - 2014Jan03EF	xc619-1	NCU04619	3	21.23	0.22		21.37	7.8	0.39	18.9	6.9	0.17		74.73	13.11		0.34	0.07
14666	Neurospora TF Circadian Clock - 2014Jan03EF	xc619-2	NCU04619	3	21.38	0.16		21.11	7.64	0.26	18.8	6.8	0.1		90.19	19.95		0.34	0.06
14666	Neurospora TF Circadian Clock - 2014Jan03EF	xc619-3	NCU04619	3	21.43	0.48		21.42	7.99	1.73	19.1	7.1	1.14		48.71	12.07		0.34	0.07
14666	Neurospora TF Circadian Clock - 2014Jan03EF	xc619-4	NCU04619	3	21.34	0.38		20.21	6.71	0.61	17.97	5.97	0.29		106.1	24.99		0.4	0.07
14666	Neurospora TF Circadian Clock - 2014Jan03EF	xc619-5	NCU04619	3	21.83	0.12		20.2	7	0.99	18.37	6.37	0.81		51.13	21.47		0.28	0.05
14666	Neurospora TF Circadian Clock - 2014Jan03EF	xc544-1	NCU04773	3	21.99	0.12		19.47	6.37	0.65	17.83	5.83	0.5		102.4	14.58		0.25	0.05
14666	Neurospora TF Circadian Clock - 2014Jan03EF	xc544-2	NCU04773	3	21.38	0.09		21.51	8.04	0.27	19.17	7.17	0.32		89.33	12.03		0.27	0.06
14666	Neurospora TF Circadian Clock - 2014Jan03EF	xc544-3	NCU04773	3	21.25	0.09		21.27	7.71	0.22	18.83	6.83	0.12		76.05	16.44		0.3	0.06
14666	Neurospora TF Circadian Clock - 2014Jan03EF	xc544-4	NCU04773	3	22.03	0.29		18.77	5.7	0.18	17.23	5.23	0.35		114.9	2.51		0.19	0.05
14666	Neurospora TF Circadian Clock - 2014Jan03EF	xc544-5	NCU04773	3	21.11	0.12		22.09	8.45	0.5	19.43	7.43	0.42		58.76	22.47		0.37	0.08
14666	Neurospora TF Circadian Clock - 2014Jan03EF	xc544-6	NCU04773	3	21.75	0.08		20.56	7.32	0.12	18.63	6.63	0.06		119.8	1.66		0.26	0.05
14666	Neurospora TF Circadian Clock - 2014Jan03EF	xc544-7	NCU04773	3	20.94	0.05		21.89	8.14	0.45	19.1	7.1	0.44		88.27	0.69		0.26	0.05
14666	Neurospora TF Circadian Clock - 2014Jan03EF	xc544-8	NCU04773	3	21.25	0.34		21.64	8.09	0.23	19.17	7.17	0.32		53.17	5.79		0.35	0.06
14666	Neurospora TF Circadian Clock - 2014Jan03EF	xc544-9	NCU04773	3	21.37	0.23		21.38	7.91	0.31	19.03	7.03	0.15		61.26	7.9		0.41	0.07
14666	Neurospora TF Circadian Clock - 2014Jan03EF	xc669-1	NCU05383	3	22.46	0.16		18.91	6.09	0.72	17.7	5.7	0.61		54.2	13.7		0.23	0.05
14666	Neurospora TF Circadian Clock - 2014Jan03EF	xc669-2	NCU05383	3	21.69	0.22		21.4	8.12	0.36	19.33	7.33	0.32		46.04	3.28		0.26	0.06
14666	Neurospora TF Circadian Clock - 2014Jan03EF	xc669-3	NCU05383	3	22.2	0.12		18.92	5.95	0.27	17.5	5.5	0.2		105.8	30.55		0.24	0.05
14666	Neurospora TF Circadian Clock - 2014Jan03EF	xc669-4	NCU05383	3	21.79	0.03		20.04	6.82	0.13	18.2	6.2	0.1		98.85	2.42		0.23	0.04
14666	Neurospora TF Circadian Clock - 2014Jan03EF	xc669-5	NCU05383	3	22.02	0.36		18.6	5.53	0.5	17.07	5.07	0.47		88.22	20.44		0.26	0.06
14666	Neurospora TF Circadian Clock - 2014Jan03EF	xc669-6	NCU05383	3	22.21	0.21		18.87	5.9	0.51	17.47	5.47	0.31		85.96	10.13		0.2	0.04
14666	Neurospora TF Circadian Clock - 2014Jan03EF	xc625-1	NCU06213	3	21.09	0.21		21.25	7.59	1.58	18.67	6.67	1.19		69.3	18.7		0.19	0.05
14666	Neurospora TF Circadian Clock - 2014Jan03EF	xc625-2	NCU06213	3	21.27	0.21		19.85	6.31	0.15	17.6	5.6	0.3		107.4	15.16		0.17	0.04
14666	Neurospora TF Circadian Clock - 2014Jan03EF	xc625-3	NCU06213	3	21.63	0.19		20.05	6.74	0.28	18.07	6.07	0.23		61.71	16.59		0.23	0.05
14666	Neurospora TF Circadian Clock - 2014Jan03EF	xc625-4	NCU06213	3	21.03	0.2		21.31	7.61	0.92	18.67	6.67	0.65		67.63	5.98		0.33	0.06
14666	Neurospora TF Circadian Clock - 2014Jan03EF	xc625-5	NCU06213	3	21.07	0.13		21.41	7.75	0.52	18.8	6.8	0.36		79.37	1.27		0.35	0.07
14666	Neurospora TF Circadian Clock - 2014Jan03EF	xc625-6	NCU06213	3	21.03	0.18		21.46	7.76	1.23	18.8	6.8	0.92		83.04	24.05		0.23	0.05
14666	Neurospora TF Circadian Clock - 2014Jan03EF	xc624-1	NCU08294	3	21.83	0.2		21.66	8.47	0.95	19.7	7.7	0.72		82.33	32.74		0.22	0.05
14666	Neurospora TF Circadian Clock - 2014Jan03EF	xc624-2	NCU08294	3	21.77	0.21		21.06	7.83	0.13	19.1	7.1	0.26		122.1	14.78		0.22	0.05
14666	Neurospora TF Circadian Clock - 2014Jan03EF	xc624-3	NCU08294	3	21.52	0.19		22.04	8.65	0.26	19.77	7.77	0.23		106.8	19.54		0.36	0.08
14666	Neurospora TF Circadian Clock - 2014Jan03EF	xc624-4	NCU08294	3	21.64	0.1		21.44	8.13	0.37	19.33	7.33	0.25		124.3	6.92		0.33	0.07
14666	Neurospora TF Circadian Clock - 2014Jan03EF	xc934-1	NCU08443	3	21.23	0.18		21.66	8.09	0.27	19.17	7.17	0.38		105.4	11.53		0.4	0.07
14666	Neurospora TF Circadian Clock - 2014Jan03EF	xc934-2	NCU08443	3	21.18	0.12		21.57	7.98	0.6	19.03	7.03	0.59		109.2	9.18		0.43	0.07
14666	Neurospora TF Circadian Clock - 2014Jan03EF	xc934-3	NCU08443	3	22.01	0.09		19.81	6.73	0.26	18.17	6.17	0.23		159.6	28.25		0.26	0.05
14666	Neurospora TF Circadian Clock - 2014Jan03EF	xc934-4	NCU08443	3	21.3	0.28		21.3	7.77	0.59	18.9	6.9	0.35		62	9.92		0.34	0.07
14666	Neurospora TF Circadian Clock - 2014Jan03EF	xc934-5	NCU08443	3	21.84	0.08		20.48	7.3	0.42	18.63	6.63	0.38		103.4	22.99		0.3	0.07
14666	Neurospora TF Circadian Clock - 2014Jan03EF	xc934-6	NCU08443	3	21.17	0.17		21.2	7.6	0.62	18.7	6.7	0.61		111.3	14.78		0.24	0.05
14666	Neurospora TF Circadian Clock - 2014Jan03EF	xc934-7	NCU08443	3	21.77	0.17		20.29	7.06	0.28	18.4	6.4	0.17		131.8	14.92		0.16	0.04
14666	Neurospora TF Circadian Clock - 2014Jan03EF	xc923-1	NCU08652	3	21.27	0.07		20.8	7.26	0.37	18.43	6.43	0.32		113.9	8.76		0.25	0.05
14666	Neurospora TF Circadian Clock - 2014Jan03EF	xc923-2	NCU08652	3	21.12	0.38		22.01	8.38	0.19	19.37	7.37	0.25		74.31	11.58		0.3	0.06
14666	Neurospora TF Circadian Clock - 2014Jan03EF	xc923-3	NCU08652	3	21.26	0.1		21.23	7.69	0.21	18.8	6.8	0.17		84.85	4		0.36	0.06
14666	Neurospora TF Circadian Clock - 2014Jan03EF	xc923-4	NCU08652	3	21.21	0.22		21.31	7.73	0.35	18.83	6.83	0.25		48.12	22.18		0.34	0.07
14666	Neurospora TF Circadian Clock - 2014Jan03EF	xc923-5	NCU08652	3	21.38	0.25		21.44	7.97	0.35	19.1	7.1	0.1		98.47	20.74		0.35	0.07
14666	Neurospora TF Circadian Clock - 2014Jan03EF	x661-100	WT	6	21.94	0.11		20.32	7.2	0.47	18.57	6.57	0.34		113.9	19.17		0.3	0.06
14666	Neurospora TF Circadian Clock - 2014Jan03EF	x661-102	WT	6	22.03	0.13		20.06	6.98	0.8	18.42	6.42	0.66		106.1	28.03		0.3	0.06
14666	Neurospora TF Circadian Clock - 2014Jan03EF	x661-4	WT	6	22.08	0.38		19.46	6.41	0.41	17.9	5.9	0.35		152.7	14.2		0.28	0.07
14666	Neurospora TF Circadian Clock - 2014Jan03EF	x661-5	WT	6	21.66	0.13		20.28	6.98	0.84	18.3	6.3	0.71		151.6	32.02		0.28	0.06
14689	Neurospora TF Circadian Clock - 2015Apr10C2	xc418-1	NCU01238	2	20.32	0.04		22.01	7.84	0	18.63	6.63	0.04		17.06	4.34		0.3	0.06
14689	Neurospora TF Circadian Clock - 2015Apr10C2	xc418-2	NCU01238	2	20.32	0.15		22.07	7.9	0.06	18.68	6.68	0.18		19.44	0.31		0.28	0.05
14689	Neurospora TF Circadian Clock - 2015Apr10C2	xc418-3	NCU01238	3	19.94	0.21		20.78	6.33	0.42	17.27	5.27	0.18		44.56	6.87		0.22	0.05
14689	Neurospora TF Circadian Clock - 2015Apr10C2	xc418-4	NCU01238	3	20.18	0.03		21.7	7.43	0.23	18.24	6.24	0.17		37.81	4.26		0.35	0.06
14689	Neurospora TF Circadian Clock - 2015Apr10C2	xc418-5	NCU01238	3	20.07	0.19		20.88	6.53	0.48	17.45	5.45	0.27		33.18	8.33		0.31	0.08
14689	Neurospora TF Circadian Clock - 2015Apr10C2	xc418-6	NCU01238	3	20.14	0.15		21.91	7.61	0.52	18.39	6.39	0.36		24.77	1.85		0.22	0.05
14689	Neurospora TF Circadian Clock - 2015Apr10C2	xc418-7	NCU01238	3	19.84	0.06		21.08	6.57	0.16	17.43	5.43	0.13		42.06	2.8		0.19	0.05
14689	Neurospora TF Circadian Clock - 2015Apr10C2	xc418-8	NCU01238	2	20.1	0.11		20.73	6.4	0.78	17.36	5.36	0.56		39.12	10.24		0.29	0.06
14689	Neurospora TF Circadian Clock - 2015Apr10C2	xc394-2	NCU08000	3	19.73	0.41		21.23	6.63	0.82	17.45	5.45	0.41		39.14	2.71		0.37	0.09
14689	Neurospora TF Circadian Clock - 2015Apr10C2	xc394-4	NCU08000	2	20.82	0.15		22.19	8.36	0.69	19.26	7.26	0.74		35.82	10.54		0.34	0.08
14689	Neurospora TF Circadian Clock - 2015Apr10C2	xc394-6	NCU08000	2	21.53	0.35		20.68	7.3	0.65	18.55	6.55	0.28		45.37	2.7		0.29	0.06
14689	Neurospora TF Circadian Clock - 2015Apr10C2	xc394-7	NCU08000	3	20.99	0.21		21.7	7.98	0.84	18.97	6.97	0.56		32.55	2.57		0.31	0.07
14689	Neurospora TF Circadian Clock - 2015Apr10C2	xc394-8	NCU08000	2	20.8	0.14		21.53	7.68	0.02	18.66	6.66	0.11		40.48	13.96		0.39	0.08
14689	Neurospora TF Circadian Clock - 2015Apr10C2	xc394-9	NCU08000	2	20.92	0.35		21.53	7.77	0.93	18.76	6.76	0.5		52.04	14.3		0.3	0.06
14689	Neurospora TF Circadian Clock - 2015Apr10C2	xc394-13	WT	2	21.44	0.12		21.64	8.21	0.15	19.34	7.34	0.03		39.58	0.16		0.31	0.07
14689	Neurospora TF Circadian Clock - 2015Apr10C2	xc394-14	WT	3	21.37	0.03		21.16	7.68	0.26	18.84	6.84	0.21		49.82	3.43		0.25	0.06
14689	Neurospora TF Circadian Clock - 2015Apr10C2	xc394-15	WT	3	21.18	0.4		21.49	7.89	0.76	18.96	6.96	0.31		60.64	12.22		0.32	0.07
14689	Neurospora TF Circadian Clock - 2015Apr10C2	xc394-16	WT	3	21.17	0.03		21.76	8.15	0.05	19.2	7.2	0.06		49.17	10.45		0.29	0.07
14689	Neurospora TF Circadian Clock - 2015Apr10C2	xc418-12	WT	3	21.36	0.26		20.55	7.07	0.71	18.29	6.29	0.44		50.38	11.06		0.18	0.05
14689	Neurospora TF Circadian Clock - 2015Apr10C2	xc418-13	WT	3	21.19	0.25		21.72	8.13	0.96	19.17	7.17	0.61		54.32	7.03		0.31	0.07
14684	Neurospora TF Circadian Clock - 2015Apr17AD2	xc1247-1	NCU03728	2	21.17	0		20.46	6.86	1.52	18.05	6.05	1.34		85.48	0.25		0.18	0.05
14684	Neurospora TF Circadian Clock - 2015Apr17AD2	xc1247-2	NCU03728	2	21	0.21		23.2	9.49	0.9	20.3	8.3	0.99		21.61	1.46		0.25	0.07
14684	Neurospora TF Circadian Clock - 2015Apr17AD2	xc1247-3	NCU03728	3	21.4	0.09		20.6	7.14	0.67	18.37	6.37	0.55		49.98	5.87		0.3	0.06
14684	Neurospora TF Circadian Clock - 2015Apr17AD2	xc1234-1	NCU03960	2	20.98	0.5		21.5	7.77	0.46	18.8	6.8	0.85		30.83	6.07		0.36	0.1
14684	Neurospora TF Circadian Clock - 2015Apr17AD2	xc1234-2	NCU03960	3	21.15	0.19		22.13	8.51	0.16	19.5	7.5	0.17		53.16	8.35		0.33	0.06
14684	Neurospora TF Circadian Clock - 2015Apr17AD2	xc1234-3	NCU03960	3	20.47	0.26		22.97	8.9	0.97	19.55	7.55	0.93		21.32	4.42		0.26	0.07
14684	Neurospora TF Circadian Clock - 2015Apr17AD2	xc1234-4	NCU03960	3	21.14	0.39		21.85	8.23	0.99	19.23	7.23	0.61		55.77	13.11		0.16	0.04
14684	Neurospora TF Circadian Clock - 2015Apr17AD2	xc1235-1	NCU04058	3	21.27	0.18		22.98	9.44	0.75	20.37	8.37	0.51		88.74	15.88		0.23	0.04
14684	Neurospora TF Circadian Clock - 2015Apr17AD2	xc1235-2	NCU04058	2	21.21	0.25		23.88	10.3	0.93	21.19	9.19	0.69		109.6	36.98		0.38	0.09
14684	Neurospora TF Circadian Clock - 2015Apr17AD2	xc1235-3	NCU04058	3	20.82	0.11		22.86	9.03	0.19	19.83	7.83	0.12		40.92	4.89		0.23	0.05
14684	Neurospora TF Circadian Clock - 2015Apr17AD2	xc666-1	NCU06656	3	20.64	0.16		21.7	7.74	0.25	18.67	6.67	0.12		58.24	17.22		0.23	0.06
14684	Neurospora TF Circadian Clock - 2015Apr17AD2	xc666-2	NCU06656	3	21.13	0.1		20.07	6.44	0.95	17.67	5.67	0.76		38.21	9.52		0.28	0.06
14684	Neurospora TF Circadian Clock - 2015Apr17AD2	xc666-3	NCU06656	3	20.84	0.3		21	7.19	0.8	18.23	6.23	0.46		77.72	16.16		0.28	0.05
14684	Neurospora TF Circadian Clock - 2015Apr17AD2	xc666-4	NCU06656	3	21.06	0.11		19.72	6.04	0.51	17.3	5.3	0.46		82.87	8.48		0.24	0.05
14684	Neurospora TF Circadian Clock - 2015Apr17AD2	xc666-5	NCU06656	3	21	0.21		20.89	7.18	0.94	18.27	6.27	0.64		71.33	19.44		0.27	0.05
14684	Neurospora TF Circadian Clock - 2015Apr17AD2	xc666-6	NCU06656	2	20.84	0.01		21.13	7.31	0.4	18.35	6.35	0.35		66.32	14.52		0.23	0.05
14684	Neurospora TF Circadian Clock - 2015Apr17AD2	xc666-7	NCU06656	3	20.78	0.06		20.75	6.9	0.35	17.97	5.97	0.35		59.03	20.43		0.26	0.05
14684	Neurospora TF Circadian Clock - 2015Apr17AD2	xc666-8	NCU06656	3	20.62	0.2		21.69	7.73	0.34	18.63	6.63	0.12		46.28	8.55		0.24	0.06
14684	Neurospora TF Circadian Clock - 2015Apr17AD2	xc666-9	NCU06656	2	21	0.16		20.8	7.09	0.96	18.2	6.2	0.71		72.6	1.65		0.34	0.06
14684	Neurospora TF Circadian Clock - 2015Apr17AD2	xc1246-1	NCU06874	2	21.42	0.27		21.91	8.46	0.2	19.55	7.55	0.07		62.08	9.88		0.36	0.06
14684	Neurospora TF Circadian Clock - 2015Apr17AD2	xc1246-2	NCU06874	3	21.5	0.1		22.74	9.34	0.15	20.37	8.37	0.23		44.62	8.72		0.38	0.08
14684	Neurospora TF Circadian Clock - 2015Apr17AD2	xc1246-3	NCU06874	2	21.56	0.04		21.43	8.07	0.99	19.25	7.25	0.92		51.07	22.34		0.41	0.08
14684	Neurospora TF Circadian Clock - 2015Apr17AD2	xc1246-4	NCU06874	2	21.35	0.42		23	9.51	1.64	20.6	8.6	1.27		45.8	6.22		0.32	0.08
14684	Neurospora TF Circadian Clock - 2015Apr17AD2	x661-5	WT	12	21.27	0.24		21.75	8.21	0.75	19.31	7.31	0.67		78.71	37.44		0.28	0.06
14684	Neurospora TF Circadian Clock - 2015Apr17AD2	x661-6	WT	12	21.29	0.12		22.14	8.61	0.56	19.64	7.64	0.45		58.17	17.93		0.29	0.06
14690	Neurospora TF Circadian Clock - 2015Nov13A2	xc1881-10	NCU06614	3	21.41	0.5		21.83	8.37	0.56	19.47	7.47	0.49		63.01	17.71		0.36	0.07
14690	Neurospora TF Circadian Clock - 2015Nov13A2	xc1881-11	NCU06614	2	21.32	0.15		22.4	8.89	0.16	19.9	7.9	0		33.5	3.73		0.3	0.06
14690	Neurospora TF Circadian Clock - 2015Nov13A2	xc1881-2	NCU06614	3	21.3	0.22		21.04	7.52	0.64	18.67	6.67	0.46		129.2	41.52		0.37	0.06
14690	Neurospora TF Circadian Clock - 2015Nov13A2	xc1881-3	NCU06614	3	21.2	0.11		22.5	8.92	0.45	19.87	7.87	0.35		59.68	16.19		0.26	0.06
14690	Neurospora TF Circadian Clock - 2015Nov13A2	xc1881-4	NCU06614	2	21.32	0.31		20.94	7.43	0.17	18.6	6.6	0.42		93.55	38.82		0.24	0.06
14690	Neurospora TF Circadian Clock - 2015Nov13A2	xc1881-5	NCU06614	3	21.34	0.13		20.92	7.42	0.32	18.6	6.6	0.26		136.6	33.41		0.27	0.05
14690	Neurospora TF Circadian Clock - 2015Nov13A2	xc1881-6	NCU06614	2	20.97	0.06		22.78	9.04	0.06	19.9	7.9	0		20.62	2.41		0.38	0.09
14690	Neurospora TF Circadian Clock - 2015Nov13A2	xc1881-7	NCU06614	2	20.84	0.08		23.04	9.22	1.4	20.03	8.03	1.17		38.06	9.12		0.21	0.06
14690	Neurospora TF Circadian Clock - 2015Nov13A2	xc1881-8	NCU06614	3	21.24	0.28		21.7	8.14	0.38	19.2	7.2	0.1		90.6	20.15		0.22	0.06
14690	Neurospora TF Circadian Clock - 2015Nov13A2	xc1881-9	NCU06614	3	21.33	0.35		21.6	8.1	0.52	19.2	7.2	0.26		102.1	16.1		0.26	0.06
14690	Neurospora TF Circadian Clock - 2015Nov13A2	xc1876-1	NCU06965	3	21.46	0.12		21.95	8.53	0.17	19.63	7.63	0.25		54.8	6.71		0.36	0.07
14690	Neurospora TF Circadian Clock - 2015Nov13A2	xc1876-2	NCU06965	3	21.36	0.14		22.21	8.73	0.42	19.77	7.77	0.25		49.5	12.13		0.3	0.07
14690	Neurospora TF Circadian Clock - 2015Nov13A2	xc1876-3	NCU06965	3	21.42	0.05		21.85	8.4	0.67	19.5	7.5	0.56		56.61	2.18		0.3	0.06
14690	Neurospora TF Circadian Clock - 2015Nov13A2	xc1876-4	NCU06965	2	21.4	0.17		21.87	8.41	0.14	19.5	7.5	0.28		35.2	11.5		0.44	0.1
14690	Neurospora TF Circadian Clock - 2015Nov13A2	xc1876-5	NCU06965	3	21.34	0.02		21.66	8.16	0.26	19.27	7.27	0.25		114.3	19.43		0.3	0.06
14690	Neurospora TF Circadian Clock - 2015Nov13A2	xc1876-6	NCU06965	3	21.5	0.21		21.51	8.12	0.24	19.27	7.27	0.21		75.41	9.05		0.27	0.06
14690	Neurospora TF Circadian Clock - 2015Nov13A2	xc1876-7	NCU06965	3	21.38	0.22		21.74	8.27	0.45	19.37	7.37	0.29		79.03	14.49		0.25	0.06
14690	Neurospora TF Circadian Clock - 2015Nov13A2	xc1085-10	WT	3	21.3	0.23		21.72	8.2	0.92	19.27	7.27	0.6		54.64	3.3		0.28	0.06
14690	Neurospora TF Circadian Clock - 2015Nov13A2	xc1085-11	WT	2	21.45	0.25		20.76	7.33	0.17	18.55	6.55	0.07		79.88	15.21		0.29	0.05
14690	Neurospora TF Circadian Clock - 2015Nov13A2	xc1085-12	WT	2	21.24	0.23		20.63	7.07	0.78	18.25	6.25	0.49		91.36	1		0.19	0.06
14690	Neurospora TF Circadian Clock - 2015Nov13A2	xc1085-13	WT	3	21.38	0.1		21.14	7.67	0.32	18.83	6.83	0.21		57.97	10.67		0.31	0.06
14690	Neurospora TF Circadian Clock - 2015Nov13A2	xc1085-14	WT	3	21.05	0.05		21.7	8.02	0.17	19.03	7.03	0.12		33.1	10.65		0.32	0.07
14690	Neurospora TF Circadian Clock - 2015Nov13A2	xc1085-15	WT	3	21.31	0.07		20.69	7.17	0.02	18.37	6.37	0.06		75.79	26.69		0.29	0.06
14690	Neurospora TF Circadian Clock - 2015Nov13A2	xc1085-16	WT	3	21.37	0.33		21.2	7.73	1.05	18.87	6.87	0.65		99.53	39.53		0.26	0.06
15483	Neurospora TF Circadian Clock - 2015Oct23CD2	xc1854-1	NCU00090	2	20.74	0.22		20.71	6.83	0.11	17.9	5.9	0.28		24.61	2.33		0.34	0.08
15483	Neurospora TF Circadian Clock - 2015Oct23CD2	xc1854-2	NCU00090	3	21.32	0.53		18.75	5.25	2.64	16.62	4.62	1.97		73.04	22.65		0.25	0.06
15483	Neurospora TF Circadian Clock - 2015Oct23CD2	xc1854-3	NCU00090	3	21.59	0.49		18.11	4.77	1.99	16.27	4.27	1.45		163.1	88.11		0.21	0.04
15483	Neurospora TF Circadian Clock - 2015Oct23CD2	xc1854-4	NCU00090	3	21.19	0.24		19.15	5.56	1.1	16.9	4.9	0.79		77.74	5.39		0.2	0.05
15483	Neurospora TF Circadian Clock - 2015Oct23CD2	xc1854-5	NCU00090	3	20.91	0.15		21.34	7.56	0.37	18.6	6.6	0.46		39.32	17.39		0.27	0.06
15483	Neurospora TF Circadian Clock - 2015Oct23CD2	xc1877-1	NCU00100	3	21.65	0.13		19.85	6.55	0.57	17.9	5.9	0.44		149.4	23.05		0.25	0.05
15483	Neurospora TF Circadian Clock - 2015Oct23CD2	xc1877-2	NCU00100	3	21.79	0.12		19.5	6.28	0.21	17.7	5.7	0.1		101.5	8.35		0.33	0.08
15483	Neurospora TF Circadian Clock - 2015Oct23CD2	xc1877-3	NCU00100	3	21.54	0.16		20.69	7.32	0.2	18.57	6.57	0.06		55.45	5.46		0.3	0.07
15483	Neurospora TF Circadian Clock - 2015Oct23CD2	xc1877-4	NCU00100	3	21.57	0.06		20.51	7.15	0.07	18.43	6.43	0.12		104.5	4.37		0.26	0.06
15483	Neurospora TF Circadian Clock - 2015Oct23CD2	xc1877-5	NCU00100	3	21.19	0.35		20.92	7.33	1.2	18.47	6.47	0.86		57.05	2.03		0.24	0.06
15483	Neurospora TF Circadian Clock - 2015Oct23CD2	xc1877-6	NCU00100	3	21.46	0.29		19.72	6.3	0.24	17.63	5.63	0.06		109.6	19.73		0.28	0.07
15483	Neurospora TF Circadian Clock - 2015Oct23CD2	xc1877-7	NCU00100	3	21.32	0.1		20.68	7.17	0.75	18.37	6.37	0.6		39.52	14.14		0.25	0.06
15483	Neurospora TF Circadian Clock - 2015Oct23CD2	xc1879-1	NCU00155	2	21.42	0.19		19.27	5.83	0.3	17.2	5.2	0.42		129.4	8.84		0.15	0.03
15483	Neurospora TF Circadian Clock - 2015Oct23CD2	xc1879-2	NCU00155	3	21.9	0.15		18.45	5.3	0.48	16.83	4.83	0.5		175.8	31.17		0.23	0.05
15483	Neurospora TF Circadian Clock - 2015Oct23CD2	xc1879-3	NCU00155	3	21.53	0.25		19.1	5.72	0.32	17.13	5.13	0.12		125.9	24.56		0.22	0.05
15483	Neurospora TF Circadian Clock - 2015Oct23CD2	xc1879-4	NCU00155	3	21.57	0.09		19.7	6.35	0.53	17.7	5.7	0.46		50.42	3.97		0.27	0.06
15483	Neurospora TF Circadian Clock - 2015Oct23CD2	xc1879-5	NCU00155	3	21.38	0.16		19.87	6.4	0.28	17.7	5.7	0.3		89.79	12		0.14	0.04
15483	Neurospora TF Circadian Clock - 2015Oct23CD2	xc1879-6	NCU00155	3	21.48	0.09		20.12	6.72	0.14	18	6	0.1		211.3	4.45		0.29	0.05
15483	Neurospora TF Circadian Clock - 2015Oct23CD2	xc1879-7	NCU00155	3	21.62	0.18		19.73	6.41	1.35	17.77	5.77	1.1		106.2	28.41		0.2	0.05
15483	Neurospora TF Circadian Clock - 2015Oct23CD2	xc1879-8	NCU00155	3	21.62	0.02		19.17	5.85	0.36	17.27	5.27	0.32		79.48	9.47		0.31	0.06
15483	Neurospora TF Circadian Clock - 2015Oct23CD2	xc1868-1	NCU00282	3	21.34	0.19		19.8	6.31	0.37	17.6	5.6	0.17		35.06	6.5		0.24	0.05
15483	Neurospora TF Circadian Clock - 2015Oct23CD2	xc1868-2	NCU00282	3	21.82	0.08		18.92	5.72	0.31	17.2	5.2	0.26		51.32	18.03		0.24	0.05
15483	Neurospora TF Circadian Clock - 2015Oct23CD2	xc1868-3	NCU00282	3	21.75	0.04		17.69	4.45	0.58	16.03	4.03	0.55		70.66	31.33		0.22	0.05
15483	Neurospora TF Circadian Clock - 2015Oct23CD2	xc1868-4	NCU00282	3	21.66	0.14		18.65	5.35	0.91	16.83	4.83	0.72		89.93	17.24		0.22	0.05
15483	Neurospora TF Circadian Clock - 2015Oct23CD2	xc1868-5	NCU00282	3	21.78	0.18		18.67	5.44	0.82	16.93	4.93	0.6		78.91	11.31		0.21	0.05
15483	Neurospora TF Circadian Clock - 2015Oct23CD2	xc1868-6	NCU00282	3	21.31	0.2		20.2	6.69	0.58	17.93	5.93	0.38		21.16	3.44		0.24	0.05
15483	Neurospora TF Circadian Clock - 2015Oct23CD2	xc1868-7	NCU00282	3	21.59	0.2		19.42	6.08	0.31	17.47	5.47	0.12		58.44	23.39		0.19	0.04
15483	Neurospora TF Circadian Clock - 2015Oct23CD2	xc1864-1	NCU04851	3	21.91	0.07		18.4	5.26	0.71	16.8	4.8	0.61		70.52	17.56		0.26	0.06
15483	Neurospora TF Circadian Clock - 2015Oct23CD2	xc1864-2	NCU04851	3	21.35	0.13		19.78	6.3	0.47	17.6	5.6	0.35		50.34	6.19		0.21	0.05
15483	Neurospora TF Circadian Clock - 2015Oct23CD2	xc1864-3	NCU04851	3	21.24	0.14		20.65	7.1	0.48	18.27	6.27	0.35		47.28	19.4		0.34	0.08
15483	Neurospora TF Circadian Clock - 2015Oct23CD2	xc1864-4	NCU04851	3	21.45	0.08		19.73	6.3	0.39	17.63	5.63	0.42		29.76	12.5		0.24	0.06
15483	Neurospora TF Circadian Clock - 2015Oct23CD2	xc1864-5	NCU04851	3	21.75	0.07		18.39	5.15	0.34	16.67	4.67	0.35		78.21	18.09		0.25	0.05
15483	Neurospora TF Circadian Clock - 2015Oct23CD2	xc1864-6	NCU04851	3	21.31	0.06		19.82	6.31	0.14	17.6	5.6	0.17		41.52	15.45		0.22	0.05
15483	Neurospora TF Circadian Clock - 2015Oct23CD2	xc1874-1	NCU06975	3	22.05	0.2		19.67	6.61	1.5	18.07	6.07	1.25		155.2	19.76		0.3	0.06
15483	Neurospora TF Circadian Clock - 2015Oct23CD2	xc1874-2	NCU06975	3	22.23	0.08		18.93	5.97	0.3	17.53	5.53	0.32		137.4	8.55		0.27	0.06
15483	Neurospora TF Circadian Clock - 2015Oct23CD2	xc1874-3	NCU06975	3	22.01	0.26		18.77	5.68	1.69	17.2	5.2	1.34		80.13	40.24		0.21	0.05
15483	Neurospora TF Circadian Clock - 2015Oct23CD2	xc1874-4	NCU06975	3	22.1	0.25		19.58	6.55	0.44	18.03	6.03	0.42		102.9	16.72		0.25	0.06
15483	Neurospora TF Circadian Clock - 2015Oct23CD2	xc1875-1	NCU07675	3	20.47	0.32		21.53	7.46	0.15	18.37	6.37	0.25		28.81	12.53		0.32	0.09
15483	Neurospora TF Circadian Clock - 2015Oct23CD2	xc1875-2	NCU07675	3	21.31	0.27		19.86	6.34	0.34	17.63	5.63	0.32		27.49	2.54		0.24	0.06
15483	Neurospora TF Circadian Clock - 2015Oct23CD2	xc1875-3	NCU07675	3	20.8	0.12		22.93	9.08	0.61	19.87	7.87	0.42		22.14	2.47		0.45	0.11
15483	Neurospora TF Circadian Clock - 2015Oct23CD2	xc1875-4	NCU07675	3	20.97	0.38		21.33	7.6	0.66	18.63	6.63	0.4		16.83	0.42		0.41	0.11
15483	Neurospora TF Circadian Clock - 2015Oct23CD2	xc1875-5	NCU07675	3	21.29	0.13		19.65	6.12	0.5	17.43	5.43	0.35		86.9	11.1		0.24	0.06
15483	Neurospora TF Circadian Clock - 2015Oct23CD2	x654-14	WT	6	21.43	0.6		19.52	6.08	1.77	17.4	5.4	1.15		85.1	37.18		0.26	0.07
15483	Neurospora TF Circadian Clock - 2015Oct23CD2	x654-16	WT	6	21.68	0.08		19.49	6.21	0.57	17.6	5.6	0.5		87.26	19.38		0.36	0.07
15483	Neurospora TF Circadian Clock - 2015Oct23CD2	x661-4	WT	6	21.69	0.15		19.62	6.34	0.66	17.73	5.73	0.48		64.78	21.19		0.28	0.06
15483	Neurospora TF Circadian Clock - 2015Oct23CD2	x661-5	WT	6	21.74	0.22		19	5.75	0.82	17.2	5.2	0.64		90.14	38.44		0.33	0.08
14664	Neurospora TF Circadian Clock - 2017Jun09ABCD2	xc2094-1	NCU02142	3	22.85	0.08		16.35	3.75	0.63	15.57	3.57	0.55		36.36	3.96		0.33	0.09
14664	Neurospora TF Circadian Clock - 2017Jun09ABCD2	xc2094-2	NCU02142	3	23.11	0.23		16.27	3.81	0.15	15.67	3.67	0.06		38.49	1.56		0.46	0.13
14664	Neurospora TF Circadian Clock - 2017Jun09ABCD2	xc2094-3	NCU02142	3	22.49	0.11		15.47	2.67	0.2	14.5	2.5	0.17		40.46	0.74		0.26	0.06
14664	Neurospora TF Circadian Clock - 2017Jun09ABCD2	xc2094-4	NCU02142	3	22.88	0.29		15.71	3.13	0.41	14.97	2.97	0.21		45.13	4.78		0.35	0.1
14664	Neurospora TF Circadian Clock - 2017Jun09ABCD2	xc2094-5	NCU02142	3	22.75	0.21		15.58	2.92	0.08	14.77	2.77	0.21		44.75	3.03		0.25	0.07
14664	Neurospora TF Circadian Clock - 2017Jun09ABCD2	xc2094-6	NCU02142	3	22.8	0.15		16.24	3.61	0.32	15.43	3.43	0.4		38.9	1.88		0.35	0.08
14664	Neurospora TF Circadian Clock - 2017Jun09ABCD2	xc2086-1	NCU02525	3	22.69	0.05		16.32	3.63	0.17	15.43	3.43	0.15		29.03	1.57		0.34	0.09
14664	Neurospora TF Circadian Clock - 2017Jun09ABCD2	xc2086-2	NCU02525	3	22.67	0.14		16.41	3.71	0.1	15.5	3.5	0		36.3	1.71		0.33	0.1
14664	Neurospora TF Circadian Clock - 2017Jun09ABCD2	xc2086-3	NCU02525	3	22.78	0.14		16.47	3.82	0.21	15.63	3.63	0.12		27.67	2.25		0.37	0.12
14664	Neurospora TF Circadian Clock - 2017Jun09ABCD2	xc2086-4	NCU02525	3	22.75	0.17		16.63	3.97	0.14	15.77	3.77	0.06		28.3	1.74		0.43	0.11
14664	Neurospora TF Circadian Clock - 2017Jun09ABCD2	xc2086-5	NCU02525	3	22.61	0.17		15.71	2.97	0.48	14.8	2.8	0.46		30.83	5.25		0.35	0.1
14664	Neurospora TF Circadian Clock - 2017Jun09ABCD2	xc2095-1	NCU02576	3	22.74	0.11		15.62	2.96	0.25	14.8	2.8	0.17		68.99	25.45		0.22	0.05
14664	Neurospora TF Circadian Clock - 2017Jun09ABCD2	xc2095-2	NCU02576	3	22.95	0.19		16.11	3.57	0.32	15.4	3.4	0.26		54.74	3.19		0.28	0.07
14664	Neurospora TF Circadian Clock - 2017Jun09ABCD2	xc2095-3	NCU02576	3	22.88	0.11		16.57	3.99	0.53	15.8	3.8	0.53		60.9	9.04		0.26	0.06
14664	Neurospora TF Circadian Clock - 2017Jun09ABCD2	xc2095-4	NCU02576	3	22.74	0.21		17.1	4.43	0.06	16.2	4.2	0.17		68.91	7.24		0.33	0.07
14664	Neurospora TF Circadian Clock - 2017Jun09ABCD2	xc2095-5	NCU02576	3	22.9	0.08		16.07	3.49	0	15.33	3.33	0.06		91.36	5.18		0.26	0.07
14664	Neurospora TF Circadian Clock - 2017Jun09ABCD2	xc2095-6	NCU02576	3	22.72	0.16		16.76	4.09	0.22	15.87	3.87	0.15		79.93	8.59		0.31	0.07
14664	Neurospora TF Circadian Clock - 2017Jun09ABCD2	xc2095-7	NCU02576	3	22.37	0.03		16.02	3.14	0.15	14.93	2.93	0.15		37.81	1.36		0.29	0.07
14664	Neurospora TF Circadian Clock - 2017Jun09ABCD2	xc2090-1	NCU02699	3	22.83	0.18		16.01	3.4	0.47	15.23	3.23	0.55		32.88	2.32		0.38	0.1
14664	Neurospora TF Circadian Clock - 2017Jun09ABCD2	xc2090-2	NCU02699	3	22.6	0.08		16	3.26	0.21	15.07	3.07	0.15		24.41	4.44		0.35	0.09
14664	Neurospora TF Circadian Clock - 2017Jun09ABCD2	xc2090-3	NCU02699	3	22.83	0.03		16.19	3.57	0.23	15.4	3.4	0.2		28.39	0.56		0.5	0.14
14664	Neurospora TF Circadian Clock - 2017Jun09ABCD2	xc2090-4	NCU02699	3	22.46	0.24		16.24	3.42	0.24	15.2	3.2	0.36		31.32	12.61		0.37	0.1
14664	Neurospora TF Circadian Clock - 2017Jun09ABCD2	xc2090-5	NCU02699	3	22.52	0.04		16.34	3.55	0.08	15.33	3.33	0.06		37.47	4.09		0.32	0.08
14664	Neurospora TF Circadian Clock - 2017Jun09ABCD2	xc2090-6	NCU02699	3	22.62	0.19		16.66	3.93	0.26	15.7	3.7	0.2		37.65	7.32		0.41	0.12
14664	Neurospora TF Circadian Clock - 2017Jun09ABCD2	xc2090-7	NCU02699	3	22.69	0.15		16.47	3.78	0.26	15.57	3.57	0.32		32.36	2.86		0.4	0.1
14664	Neurospora TF Circadian Clock - 2017Jun09ABCD2	xc2085-1	NCU03070	3	22.54	0.17		16.22	3.44	0.38	15.23	3.23	0.32		24.13	0.97		0.57	0.22
14664	Neurospora TF Circadian Clock - 2017Jun09ABCD2	xc2085-2	NCU03070	3	23.04	0.06		15.97	3.47	0.75	15.33	3.33	0.76		37.08	1.88		0.26	0.06
14664	Neurospora TF Circadian Clock - 2017Jun09ABCD2	xc2085-3	NCU03070	3	22.67	0.07		15.98	3.27	0.08	15.1	3.1	0.1		30.06	1.03		0.26	0.07
14664	Neurospora TF Circadian Clock - 2017Jun09ABCD2	xc2085-4	NCU03070	3	21.49	0.06		15.67	2.27	0.36	14.03	2.03	0.35		10.36	0.82		0.58	0.13
14664	Neurospora TF Circadian Clock - 2017Jun09ABCD2	xc2085-5	NCU03070	3	22.99	0.06		15.94	3.41	0.26	15.27	3.27	0.21		32.14	5.26		0.37	0.11
14664	Neurospora TF Circadian Clock - 2017Jun09ABCD2	xc2085-6	NCU03070	3	22.9	0.14		15.83	3.25	0.1	15.1	3.1	0		35.83	2.28		0.36	0.1
14664	Neurospora TF Circadian Clock - 2017Jun09ABCD2	xc2085-7	NCU03070	3	22.72	0.08		16.13	3.45	0.2	15.27	3.27	0.15		38.51	1.44		0.29	0.08
14664	Neurospora TF Circadian Clock - 2017Jun09ABCD2	xc2088-1	NCU03110	3	22.63	0.11		16.26	3.53	0.32	15.33	3.33	0.23		29.24	6.92		0.4	0.1
14664	Neurospora TF Circadian Clock - 2017Jun09ABCD2	xc2088-2	NCU03110	3	22.41	0.11		16.39	3.53	0.26	15.3	3.3	0.2		28.31	6.58		0.37	0.1
14664	Neurospora TF Circadian Clock - 2017Jun09ABCD2	xc2088-3	NCU03110	3	22.18	0.19		16.05	3.06	0.12	14.83	2.83	0.15		37.62	5.53		0.32	0.08
14664	Neurospora TF Circadian Clock - 2017Jun09ABCD2	xc2088-4	NCU03110	3	22.54	0.12		16.32	3.55	0.45	15.33	3.33	0.49		29.76	0.73		0.5	0.1
14664	Neurospora TF Circadian Clock - 2017Jun09ABCD2	xc2088-5	NCU03110	3	22.14	0.04		16.52	3.51	0.38	15.23	3.23	0.32		28.05	1.61		0.39	0.11
14664	Neurospora TF Circadian Clock - 2017Jun09ABCD2	xc2088-6	NCU03110	3	22.36	0.09		15.96	3.08	0.12	14.87	2.87	0.06		28.14	1.44		0.37	0.09
14664	Neurospora TF Circadian Clock - 2017Jun09ABCD2	xc2087-1	NCU03120	3	22.52	0.39		16.41	3.62	0.28	15.4	3.4	0.1		26.25	2.96		0.47	0.14
14664	Neurospora TF Circadian Clock - 2017Jun09ABCD2	xc2087-2	NCU03120	3	22.8	0.16		16.53	3.89	0.33	15.7	3.7	0.2		29.7	2.62		0.37	0.09
14664	Neurospora TF Circadian Clock - 2017Jun09ABCD2	xc2087-3	NCU03120	3	22.79	0.11		16.5	3.86	0.5	15.67	3.67	0.4		25.06	1.41		0.42	0.11
14664	Neurospora TF Circadian Clock - 2017Jun09ABCD2	xc2087-4	NCU03120	3	22.57	0.08		15.63	2.87	0.28	14.7	2.7	0.3		29.34	3.75		0.23	0.06
14664	Neurospora TF Circadian Clock - 2017Jun09ABCD2	xc2092-1	NCU09120	3	22.77	0.21		15.71	3.06	0.42	14.9	2.9	0.26		44.67	2.43		0.4	0.14
14664	Neurospora TF Circadian Clock - 2017Jun09ABCD2	xc2092-2	NCU09120	3	22.81	0.25		16.38	3.76	0.19	15.57	3.57	0.31		41.23	2.24		0.44	0.13
14664	Neurospora TF Circadian Clock - 2017Jun09ABCD2	xc2092-3	NCU09120	3	22.85	0.21		15.96	3.36	0.1	15.2	3.2	0.17		36.95	3.72		0.27	0.07
14664	Neurospora TF Circadian Clock - 2017Jun09ABCD2	xc2092-4	NCU09120	3	22.61	0.07		17.02	4.28	0.19	16.03	4.03	0.21		35.03	1.44		0.37	0.09
14664	Neurospora TF Circadian Clock - 2017Jun09ABCD2	xc2092-5	NCU09120	3	22.83	0.1		16.26	3.65	0.23	15.47	3.47	0.21		34.79	3.58		0.42	0.1
14664	Neurospora TF Circadian Clock - 2017Jun09ABCD2	xc2092-6	NCU09120	3	22.9	0.12		16.04	3.46	0.11	15.3	3.3	0.1		36.31	4.59		0.31	0.09
14664	Neurospora TF Circadian Clock - 2017Jun09ABCD2	xc2089-1	NCU09205	3	22.79	0.21		16.6	3.96	1.02	15.77	3.77	0.9		39.93	4.06		0.36	0.1
14664	Neurospora TF Circadian Clock - 2017Jun09ABCD2	xc2089-2	NCU09205	3	22.6	0.16		16.32	3.58	0.32	15.37	3.37	0.21		32.61	2.41		0.26	0.07
14664	Neurospora TF Circadian Clock - 2017Jun09ABCD2	xc2089-3	NCU09205	3	22.78	0.14		16.58	3.94	0.35	15.73	3.73	0.23		41.1	5.56		0.38	0.1
14664	Neurospora TF Circadian Clock - 2017Jun09ABCD2	xc2089-4	NCU09205	3	22.57	0.06		16.95	4.19	0.28	15.93	3.93	0.29		39.68	2.55		0.3	0.07
14664	Neurospora TF Circadian Clock - 2017Jun09ABCD2	xc2089-5	NCU09205	3	22.72	0.1		16.48	3.8	0.12	15.6	3.6	0.1		37.12	1.96		0.29	0.08
14664	Neurospora TF Circadian Clock - 2017Jun09ABCD2	xc2093-1	NCU09315	3	22.97	0.17		15.99	3.45	0.4	15.3	3.3	0.26		37.47	5.27		0.44	0.13
14664	Neurospora TF Circadian Clock - 2017Jun09ABCD2	xc2093-2	NCU09315	3	23.39	0.24		15.94	3.62	0.52	15.53	3.53	0.35		41.09	5.6		0.56	0.14
14664	Neurospora TF Circadian Clock - 2017Jun09ABCD2	xc2093-3	NCU09315	3	22.91	0.04		15.82	3.25	0.02	15.1	3.1	0		59.53	10.4		0.21	0.06
14664	Neurospora TF Circadian Clock - 2017Jun09ABCD2	xc2093-4	NCU09315	3	23.35	0.25		15.97	3.64	0.41	15.53	3.53	0.23		46.58	4.31		0.43	0.11
14664	Neurospora TF Circadian Clock - 2017Jun09ABCD2	xc2093-5	NCU09315	3	23.19	0.53		15.95	3.53	0.5	15.4	3.4	0.3		37.74	2.53		0.54	0.16
14664	Neurospora TF Circadian Clock - 2017Jun09ABCD2	xc2093-6	NCU09315	3	22.94	0.12		16.53	3.98	0.1	15.8	3.8	0.1		32.5	4.23		0.37	0.09
14664	Neurospora TF Circadian Clock - 2017Jun09ABCD2	xc2096-1	NCU09387	3	22.9	0.14		15.58	3.01	0.21	14.87	2.87	0.15		56.63	6.08		0.24	0.07
14664	Neurospora TF Circadian Clock - 2017Jun09ABCD2	xc2096-2	NCU09387	3	22.48	0.26		16.34	3.53	0.19	15.3	3.3	0.1		38.43	0.79		0.48	0.17
14664	Neurospora TF Circadian Clock - 2017Jun09ABCD2	xc2096-3	NCU09387	3	22.66	0.01		16.66	3.95	0.44	15.73	3.73	0.4		36.29	1.68		0.3	0.07
14664	Neurospora TF Circadian Clock - 2017Jun09ABCD2	xc2096-4	NCU09387	3	22.61	0.09		16.28	3.55	0.35	15.33	3.33	0.38		31.66	1.39		0.3	0.07
14664	Neurospora TF Circadian Clock - 2017Jun09ABCD2	xc2096-5	NCU09387	3	22.82	0.18		15.32	2.7	0.24	14.57	2.57	0.15		41.62	1.27		0.22	0.06
14664	Neurospora TF Circadian Clock - 2017Jun09ABCD2	xc2096-6	NCU09387	3	22.68	0.07		15.94	3.24	0.13	15.07	3.07	0.15		38.28	4.19		0.28	0.07
14664	Neurospora TF Circadian Clock - 2017Jun09ABCD2	xc2096-7	NCU09387	3	22.67	0.07		15.99	3.28	0.96	15.1	3.1	0.87		57.53	37.18		0.23	0.06
14664	Neurospora TF Circadian Clock - 2017Jun09ABCD2	xc2096-8	NCU09387	3	22.52	0.12		16.12	3.34	0.53	15.13	3.13	0.58		35.37	4		0.3	0.07
14664	Neurospora TF Circadian Clock - 2017Jun09ABCD2	xc2086-6	WT	3	23.03	0.2		16.26	3.75	0.25	15.6	3.6	0.17		38.01	0.69		0.31	0.09
14664	Neurospora TF Circadian Clock - 2017Jun09ABCD2	xc2088-7	WT	3	22.93	0.1		16.4	3.84	0.19	15.67	3.67	0.25		35.22	4.42		0.52	0.23
14664	Neurospora TF Circadian Clock - 2017Jun09ABCD2	xc2091-15	WT	3	22.6	0.09		15.93	3.19	0.08	15	3	0.1		27.15	0.39		0.29	0.07
14664	Neurospora TF Circadian Clock - 2017Jun09ABCD2	xc2091-16	WT	3	22.61	0.12		15.88	3.14	0.16	14.97	2.97	0.15		32.92	2.73		0.29	0.08
14664	Neurospora TF Circadian Clock - 2017Jun09ABCD2	xc2091-17	WT	3	22.52	0.09		16.27	3.48	0.01	15.27	3.27	0.06		34.85	1.75		0.26	0.07
14664	Neurospora TF Circadian Clock - 2017Jun09ABCD2	xc2091-18	WT	3	22.31	0.07		16.56	3.65	0.54	15.4	3.4	0.53		29.72	1.92		0.42	0.08
14664	Neurospora TF Circadian Clock - 2017Jun09ABCD2	xc2091-19	WT	3	22.66	0.09		16.56	3.86	0.03	15.63	3.63	0.06		34.86	0.73		0.32	0.09
14664	Neurospora TF Circadian Clock - 2017Jun09ABCD2	xc2093-10	WT	3	22.91	0.18		16.27	3.7	0.18	15.53	3.53	0.06		31.92	1.84		0.38	0.1
14664	Neurospora TF Circadian Clock - 2017Jun09ABCD2	xc2093-11	WT	3	22.84	0.18		15.35	2.74	0.67	14.6	2.6	0.53		52.58	19.63		0.26	0.07
14664	Neurospora TF Circadian Clock - 2017Jun09ABCD2	xc2093-7	WT	3	22.91	0.11		15.65	3.08	0.2	14.93	2.93	0.21		40.84	5.6		0.32	0.09
14664	Neurospora TF Circadian Clock - 2017Jun09ABCD2	xc2093-8	WT	2	22.79	0.01		16.11	3.48	0.16	15.3	3.3	0.14		51.9	2.85		0.26	0.07
14664	Neurospora TF Circadian Clock - 2017Jun09ABCD2	xc2093-9	WT	3	22.83	0.16		16.12	3.5	0.32	15.33	3.33	0.21		30.25	0.19		0.3	0.08
14664	Neurospora TF Circadian Clock - 2017Jun09ABCD2	xc2094-10	WT	3	22.46	0.05		15.53	2.7	0.62	14.53	2.53	0.55		37.02	7.1		0.36	0.1
14664	Neurospora TF Circadian Clock - 2017Jun09ABCD2	xc2094-11	WT	3	23	0.56		15.84	3.32	0.89	15.17	3.17	0.49		30.44	7.92		0.49	0.12
14664	Neurospora TF Circadian Clock - 2017Jun09ABCD2	xc2094-12	WT	3	23.02	0.18		16.69	4.18	0.41	16	4	0.26		33.62	5.51		0.52	0.13
14664	Neurospora TF Circadian Clock - 2017Jun09ABCD2	xc2094-7	WT	3	22.61	0.14		16.14	3.41	0.35	15.2	3.2	0.36		39.41	5.16		0.36	0.08
14664	Neurospora TF Circadian Clock - 2017Jun09ABCD2	xc2094-8	WT	3	22.42	0.07		15.77	2.92	0.17	14.73	2.73	0.15		38.5	1.06		0.25	0.07
14664	Neurospora TF Circadian Clock - 2017Jun09ABCD2	xc2094-9	WT	3	22.82	0.23		14.86	2.24	0.09	14.13	2.13	0.12		38.35	1.87		0.29	0.1
14664	Neurospora TF Circadian Clock - 2017Jun09ABCD2	xc2095-8	WT	3	23	0.16		16.84	4.32	0.13	16.13	4.13	0.23		21.41	3.54		0.62	0.2
14664	Neurospora TF Circadian Clock - 2017Jun09ABCD2	xc2095-9	WT	3	23.16	0.23		15.75	3.32	0.6	15.2	3.2	0.46		41.33	8.78		0.57	0.17
14670	Neurospora TF Circadian Clock - 2019Apr13DE1	xc1084-1	NCU00223	3	21.53	0.12		21.55	8.17	0.94	19.33	7.33	0.8		81.6	12.62		0.21	0.04
14670	Neurospora TF Circadian Clock - 2019Apr13DE1	xc1084-2	NCU00223	3	21.86	0.41		22.21	9.04	0.23	20.23	8.23	0.59		96.05	14.92		0.29	0.05
14670	Neurospora TF Circadian Clock - 2019Apr13DE1	xc1084-3	NCU00223	3	21.2	0.24		22.41	8.83	0.29	19.8	7.8	0.36		81.42	7.39		0.26	0.05
14670	Neurospora TF Circadian Clock - 2019Apr13DE1	xc1084-4	NCU00223	3	21.52	0.33		22.79	9.41	0.55	20.43	8.43	0.61		101.4	19.15		0.26	0.05
14670	Neurospora TF Circadian Clock - 2019Apr13DE1	xc1084-5	NCU00223	3	21.29	0.29		22.81	9.28	0.58	20.23	8.23	0.4		63.65	10.4		0.24	0.05
14670	Neurospora TF Circadian Clock - 2019Apr13DE1	xc1084-6	NCU00223	3	21.33	0.25		22.46	8.96	0.32	19.97	7.97	0.12		72.15	11.58		0.22	0.04
14670	Neurospora TF Circadian Clock - 2019Apr13DE1	xc1084-7	NCU00223	3	21.42	0.15		22.94	9.49	0.48	20.47	8.47	0.29		99.37	12.11		0.28	0.05
14670	Neurospora TF Circadian Clock - 2019Apr13DE1	xc1084-8	NCU00223	3	21.29	0.3		22.4	8.87	0.81	19.87	7.87	0.65		96.3	6.88		0.2	0.04
14670	Neurospora TF Circadian Clock - 2019Apr13DE1	xc1084-9	NCU00223	3	21.39	0.35		22.67	9.2	0.66	20.2	8.2	0.26		65.94	17.74		0.24	0.06
14670	Neurospora TF Circadian Clock - 2019Apr13DE1	xc2246-1	NCU02203	3	21.17	0.14		21.57	7.97	0.21	19.03	7.03	0.29		49.78	5.61		0.25	0.06
14670	Neurospora TF Circadian Clock - 2019Apr13DE1	xc2246-2	NCU02203	3	21.48	0.03		21.04	7.63	0.14	18.83	6.83	0.12		82.84	11.95		0.13	0.03
14670	Neurospora TF Circadian Clock - 2019Apr13DE1	xc2246-3	NCU02203	3	21.59	0.19		20.49	7.15	0.59	18.43	6.43	0.38		63.37	8.93		0.27	0.05
14670	Neurospora TF Circadian Clock - 2019Apr13DE1	xc2246-4	NCU02203	3	21.08	0.34		21.83	8.16	0.9	19.17	7.17	0.47		58.66	17.42		0.35	0.07
14670	Neurospora TF Circadian Clock - 2019Apr13DE1	xc2246-5	NCU02203	3	21.76	0.2		20.07	6.84	0.65	18.2	6.2	0.46		63.03	8.76		0.23	0.05
14670	Neurospora TF Circadian Clock - 2019Apr13DE1	xc2246-6	NCU02203	3	20.9	0.07		22.66	8.88	0.31	19.73	7.73	0.21		60.29	4.75		0.24	0.05
14670	Neurospora TF Circadian Clock - 2019Apr13DE1	xc2246-7	NCU02203	3	21.09	0.21		21.48	7.83	0.37	18.87	6.87	0.15		49.87	4.48		0.33	0.06
14670	Neurospora TF Circadian Clock - 2019Apr13DE1	xc1085-1	NCU02413	3	20.82	0.14		19.99	6.16	0.68	17.33	5.33	0.49		74.8	29.03		0.29	0.08
14670	Neurospora TF Circadian Clock - 2019Apr13DE1	xc1085-2	NCU02413	3	20.93	0.2		20.11	6.35	0.72	17.53	5.53	0.57		61.12	13.82		0.22	0.06
14670	Neurospora TF Circadian Clock - 2019Apr13DE1	xc1085-3	NCU02413	3	20.87	0.11		19.86	6.06	0.72	17.27	5.27	0.7		44.02	6.25		0.19	0.05
14670	Neurospora TF Circadian Clock - 2019Apr13DE1	xc1085-4	NCU02413	3	20.73	0.05		20.18	6.29	0.69	17.43	5.43	0.59		79.81	16.78		0.26	0.06
14670	Neurospora TF Circadian Clock - 2019Apr13DE1	xc2244-1	NCU03356	3	20.94	0.09		22.54	8.79	0.28	19.67	7.67	0.32		42.24	15.74		0.29	0.06
14670	Neurospora TF Circadian Clock - 2019Apr13DE1	xc2244-2	NCU03356	3	20.9	0.24		22.02	8.24	0.92	19.17	7.17	0.61		29.31	12.58		0.3	0.06
14670	Neurospora TF Circadian Clock - 2019Apr13DE1	xc2244-3	NCU03356	3	21.6	0.38		20.79	7.46	0.53	18.7	6.7	0.26		49.73	7.41		0.19	0.04
14670	Neurospora TF Circadian Clock - 2019Apr13DE1	xc2244-4	NCU03356	3	21.03	0.27		21.69	8	0.75	19	7	0.53		54.05	16.5		0.27	0.05
14670	Neurospora TF Circadian Clock - 2019Apr13DE1	xc2244-5	NCU03356	3	21.44	0.22		20.82	7.39	0.5	18.6	6.6	0.26		63.66	10.23		0.16	0.04
14670	Neurospora TF Circadian Clock - 2019Apr13DE1	xc2244-6	NCU03356	6	21.4	0.58		21.17	7.72	0.76	18.87	6.87	0.57		52.42	24.55		0.27	0.06
14670	Neurospora TF Circadian Clock - 2019Apr13DE1	xc2244-8	NCU03356	3	21.91	0.14		20.74	7.59	0.26	18.93	6.93	0.12		66.46	16.83		0.17	0.04
14670	Neurospora TF Circadian Clock - 2019Apr13DE1	xc2244-9	NCU03356	3	21.35	0.29		20.83	7.34	0.45	18.53	6.53	0.21		63.46	31.86		0.14	0.04
14670	Neurospora TF Circadian Clock - 2019Apr13DE1	xc2249-1	NCU03878	3	21.79	0.11		20.38	7.16	0.53	18.5	6.5	0.44		69.97	10.8		0.2	0.04
14670	Neurospora TF Circadian Clock - 2019Apr13DE1	xc2249-2	NCU03878	3	21.33	0.33		21.35	7.84	1.09	18.97	6.97	0.72		67.69	22.74		0.39	0.1
14670	Neurospora TF Circadian Clock - 2019Apr13DE1	xc2249-3	NCU03878	3	21.27	0.23		20.95	7.41	0.43	18.57	6.57	0.35		50.66	3.54		0.24	0.05
14670	Neurospora TF Circadian Clock - 2019Apr13DE1	xc2249-4	NCU03878	3	21.88	0.34		19.98	6.82	1.08	18.2	6.2	0.7		66.62	27.65		0.21	0.04
14670	Neurospora TF Circadian Clock - 2019Apr13DE1	xc2249-5	NCU03878	3	21.79	0.1		19.86	6.64	0.53	18.03	6.03	0.4		82.37	35.41		0.19	0.05
14670	Neurospora TF Circadian Clock - 2019Apr13DE1	xc2249-6	NCU03878	3	21.73	0.02		20.36	7.1	0.51	18.43	6.43	0.45		77.41	21.34		0.17	0.04
14670	Neurospora TF Circadian Clock - 2019Apr13DE1	xc2249-7	NCU03878	3	21.83	0.1		20.23	7.04	0.24	18.4	6.4	0.2		84.48	9.93		0.16	0.04
14670	Neurospora TF Circadian Clock - 2019Apr13DE1	xc2249-8	NCU03878	3	20.57	0.32		23.03	9.03	0.34	19.73	7.73	0.38		23.8	1.72		0.44	0.1
14670	Neurospora TF Circadian Clock - 2019Apr13DE1	xc2248-1	NCU06140	3	20.59	0.05		22.22	8.23	0.49	19.07	7.07	0.4		37.06	7.59		0.23	0.05
14670	Neurospora TF Circadian Clock - 2019Apr13DE1	xc2248-2	NCU06140	3	20.97	0.06		20.98	7.24	0.56	18.33	6.33	0.46		62.43	12.61		0.18	0.04
14670	Neurospora TF Circadian Clock - 2019Apr13DE1	xc2248-3	NCU06140	3	20.61	0.06		22.44	8.47	0.35	19.27	7.27	0.25		35.42	8.09		0.31	0.06
14670	Neurospora TF Circadian Clock - 2019Apr13DE1	xc2248-4	NCU06140	3	20.8	0.09		22.34	8.49	0.79	19.37	7.37	0.65		38.95	15.07		0.38	0.07
14670	Neurospora TF Circadian Clock - 2019Apr13DE1	xc2243-1	NCU07561	3	20.7	0.03		22.06	8.15	0.26	19.03	7.03	0.21		38.53	13.13		0.41	0.08
14670	Neurospora TF Circadian Clock - 2019Apr13DE1	xc2243-2	NCU07561	3	21.55	0.16		20.57	7.21	0.17	18.47	6.47	0.25		72.06	9.14		0.18	0.04
14670	Neurospora TF Circadian Clock - 2019Apr13DE1	xc2243-3	NCU07561	3	21.55	0.21		20.05	6.68	0.82	18	6	0.62		42.84	6.71		0.19	0.04
14670	Neurospora TF Circadian Clock - 2019Apr13DE1	xc2243-4	NCU07561	3	20.97	0.28		21.49	7.76	0.95	18.77	6.77	0.6		42.25	12.63		0.31	0.06
14670	Neurospora TF Circadian Clock - 2019Apr13DE1	xc2243-5	NCU07561	3	20.73	0.16		21.73	7.84	0.43	18.77	6.77	0.25		38.46	4.33		0.28	0.05
14670	Neurospora TF Circadian Clock - 2019Apr13DE1	xc2243-6	NCU07561	3	20.7	0.11		21.84	7.93	1.72	18.83	6.83	1.42		32.62	1.48		0.38	0.08
14670	Neurospora TF Circadian Clock - 2019Apr13DE1	xc2243-7	NCU07561	3	20.83	0.53		21.64	7.81	1.32	18.77	6.77	0.68		41.33	10.09		0.29	0.05
14670	Neurospora TF Circadian Clock - 2019Apr13DE1	xc2243-8	NCU07561	3	21.36	0.15		20.41	6.92	0.76	18.17	6.17	0.55		59.76	23.26		0.2	0.05
14670	Neurospora TF Circadian Clock - 2019Apr13DE1	x654-14	WT	6	21.64	0.18		20.5	7.19	0.9	18.48	6.48	0.67		97.16	34.52		0.23	0.05
14670	Neurospora TF Circadian Clock - 2019Apr13DE1	x654-16	WT	6	21.51	0.1		20.47	7.09	0.51	18.35	6.35	0.47		95.46	13.12		0.19	0.05
14670	Neurospora TF Circadian Clock - 2019Apr13DE1	x661-4	WT	6	21.72	0.2		20.42	7.16	0.86	18.48	6.48	0.69		57.86	15.25		0.17	0.04
14670	Neurospora TF Circadian Clock - 2019Apr13DE1	x661-5	WT	6	21.62	0.12		20.24	6.92	0.61	18.23	6.23	0.55		59.91	12.93		0.16	0.04
15697	Neurospora TF Circadian Clock - 2019Dec24B1	xc595-1	NCU06173	3	21.57	0.25		21.45	8.1	1.24	19.27	7.27	0.91		74.97	24.8		0.32	0.07
15697	Neurospora TF Circadian Clock - 2019Dec24B1	xc595-11	NCU06173	3	21.58	0.2		20.91	7.56	0.73	18.8	6.8	0.53		85.31	28.95		0.2	0.05
15697	Neurospora TF Circadian Clock - 2019Dec24B1	xc595-12	NCU06173	3	21.74	0.07		20.68	7.43	0.48	18.73	6.73	0.4		106.4	29.63		0.23	0.06
15697	Neurospora TF Circadian Clock - 2019Dec24B1	xc595-13	NCU06173	3	21.43	0.22		22.66	9.22	0.73	20.23	8.23	0.47		87.96	43.59		0.29	0.07
15697	Neurospora TF Circadian Clock - 2019Dec24B1	xc595-14	NCU06173	3	21.61	0.11		21.73	8.41	0.67	19.57	7.57	0.7		88.18	17.06		0.22	0.05
15697	Neurospora TF Circadian Clock - 2019Dec24B1	xc595-15	NCU06173	3	21.52	0.14		22.04	8.65	1.02	19.77	7.77	0.91		65.47	23.79		0.32	0.07
15697	Neurospora TF Circadian Clock - 2019Dec24B1	xc595-16	NCU06173	3	21.88	0.18		21.25	8.08	1.45	19.37	7.37	1.16		94.12	13.61		0.27	0.06
15697	Neurospora TF Circadian Clock - 2019Dec24B1	xc595-17	NCU06173	3	21.8	0.11		20.74	7.53	0.7	18.83	6.83	0.57		109.6	27.53		0.21	0.05
15697	Neurospora TF Circadian Clock - 2019Dec24B1	xc595-3	NCU06173	3	21.69	0.2		20.73	7.45	1.17	18.73	6.73	0.99		135.6	29.32		0.26	0.06
15697	Neurospora TF Circadian Clock - 2019Dec24B1	xc595-4	NCU06173	3	21.47	0.28		21.43	8.01	1	19.17	7.17	0.67		110.3	34.2		0.27	0.07
15697	Neurospora TF Circadian Clock - 2019Dec24B1	xc528-1	NCU08744	3	21.81	0.25		20.29	7.09	0.58	18.43	6.43	0.67		92.15	18.25		0.19	0.05
15697	Neurospora TF Circadian Clock - 2019Dec24B1	xc528-11	NCU08744	3	21.29	0.23		21.8	8.27	0.22	19.33	7.33	0.06		106.7	13.04		0.24	0.05
15697	Neurospora TF Circadian Clock - 2019Dec24B1	xc528-12	NCU08744	3	21.11	0.17		22.25	8.61	0.57	19.57	7.57	0.35		79.69	16.62		0.33	0.06
15697	Neurospora TF Circadian Clock - 2019Dec24B1	xc528-13	NCU08744	3	21.54	0.39		21.66	8.29	0.75	19.43	7.43	0.45		83.1	7.5		0.24	0.06
15697	Neurospora TF Circadian Clock - 2019Dec24B1	xc528-14	NCU08744	3	21.12	0.19		21.9	8.26	0.34	19.27	7.27	0.15		107.9	17.07		0.23	0.06
15697	Neurospora TF Circadian Clock - 2019Dec24B1	xc528-15	NCU08744	3	21.04	0.22		21.64	7.95	0.96	18.97	6.97	0.74		88.65	20.14		0.23	0.06
15697	Neurospora TF Circadian Clock - 2019Dec24B1	xc528-16	NCU08744	3	21.56	0.22		21.48	8.13	0.43	19.3	7.3	0.56		123	9.3		0.23	0.06
15697	Neurospora TF Circadian Clock - 2019Dec24B1	xc528-2	NCU08744	3	21.22	0.23		22.06	8.48	0.13	19.5	7.5	0.1		86.69	14.49		0.23	0.05
15697	Neurospora TF Circadian Clock - 2019Dec24B1	xc528-3	NCU08744	3	21.15	0.09		21.9	8.28	0.61	19.3	7.3	0.53		79.99	6.92		0.19	0.04
15697	Neurospora TF Circadian Clock - 2019Dec24B1	xc528-4	NCU08744	3	21.21	0.13		20.94	7.37	0.76	18.5	6.5	0.56		93.22	11.37		0.25	0.06
15697	Neurospora TF Circadian Clock - 2019Dec24B1	x654-14		3	21.43	0.12		21.83	8.39	0.49	19.5	7.5	0.52		72.28	2.21		0.24	0.05
15697	Neurospora TF Circadian Clock - 2019Dec24B1	x654-16		3	21.64	0.19		20.93	7.62	0.54	18.87	6.87	0.45		103.1	6.74		0.22	0.05
15697	Neurospora TF Circadian Clock - 2019Dec24B1	x661-4		3	21.86	0.15		20.75	7.58	0.69	18.9	6.9	0.5		76.11	28.1		0.24	0.05
15697	Neurospora TF Circadian Clock - 2019Dec24B1	x661-5		3	21.16	0.2		21.06	7.45	0.54	18.57	6.57	0.5		74.23	18.64		0.2	0.05
14665	Neurospora TF Circadian Clock - 2019Feb13ABC2	xc622-11	NCU02934	3	21.56	0.37		21.38	8.03	1.07	19.2	7.2	0.66		49.28	24.87		0.25	0.06
14665	Neurospora TF Circadian Clock - 2019Feb13ABC2	xc622-12	NCU02934	3	21.56	0.53		21.17	7.81	1.76	19	7	1.14		65.39	34.66		0.24	0.06
14665	Neurospora TF Circadian Clock - 2019Feb13ABC2	xc622-13	NCU02934	3	21.41	0.43		21.01	7.56	0.79	18.73	6.73	0.32		56.22	12.37		0.26	0.05
14665	Neurospora TF Circadian Clock - 2019Feb13ABC2	xc622-15	NCU02934	3	21.88	0.36		19.94	6.78	1.05	18.17	6.17	0.67		87.52	29.67		0.24	0.05
14665	Neurospora TF Circadian Clock - 2019Feb13ABC2	xc622-2	NCU02934	3	20.46	0.28		0.41	10.33	0.45	0.44	8.9	0.23		14.8	2.48		0.41	0.1
14665	Neurospora TF Circadian Clock - 2019Feb13ABC2	xc622-3	NCU02934	3	21.95	0.28		19.97	6.84	0.17	18.27	6.27	0.15		53.2	10.34		0.24	0.05
14665	Neurospora TF Circadian Clock - 2019Feb13ABC2	xc622-4	NCU02934	3	20.75	0.19		21.98	8.1	1.08	19	7	0.85		33.21	10.19		0.31	0.08
14665	Neurospora TF Circadian Clock - 2019Feb13ABC2	xc622-5	NCU02934	3	21.66	0.58		21.48	8.19	1.37	19.37	7.37	0.74		53.89	22.81		0.27	0.06
14665	Neurospora TF Circadian Clock - 2019Feb13ABC2	xc676-1	NCU03643	3	21.11	0.38		22.6	8.96	0.86	19.87	7.87	0.55		35.69	9.28		0.25	0.06
14665	Neurospora TF Circadian Clock - 2019Feb13ABC2	xc676-11	NCU03643	3	21.33	0.22		21.15	7.65	1.02	18.8	6.8	1.01		32.76	7.63		0.31	0.08
14665	Neurospora TF Circadian Clock - 2019Feb13ABC2	xc676-12	NCU03643	3	21.35	0.05		20.79	7.3	1.44	18.5	6.5	1.31		86.9	51.63		0.29	0.07
14665	Neurospora TF Circadian Clock - 2019Feb13ABC2	xc676-13	NCU03643	3	20.63	0.5		23.95	9.99	1.6	0.13	8.76	1.21		28.51	5.99		0.29	0.08
14665	Neurospora TF Circadian Clock - 2019Feb13ABC2	xc676-14	NCU03643	3	21.12	0.78		22.93	9.3	0.83	20.17	8.17	0.35		109.1	73.68		0.1	0.03
14665	Neurospora TF Circadian Clock - 2019Feb13ABC2	xc550-1	NCU04561	3	21.7	0.15		21.68	8.41	1.03	19.6	7.6	0.8		48.56	14.84		0.39	0.07
14665	Neurospora TF Circadian Clock - 2019Feb13ABC2	xc550-11	NCU04561	3	21.61	0.48		21.91	8.58	2.09	19.82	7.82	1.71		41.74	31.61		0.3	0.07
14665	Neurospora TF Circadian Clock - 2019Feb13ABC2	xc550-12	NCU04561	3	21.32	0.87		22.22	8.71	2.25	19.7	7.7	1.44		61.45	46.81		0.38	0.09
14665	Neurospora TF Circadian Clock - 2019Feb13ABC2	xc550-13	NCU04561	3	21.29	0.83		21.37	7.85	0.99	18.93	6.93	0.31		34.37	19.41		0.36	0.09
14665	Neurospora TF Circadian Clock - 2019Feb13ABC2	xc550-14	NCU04561	3	21.36	0.3		23.23	9.74	1.15	20.74	8.74	0.86		41.48	9.33		0.25	0.05
14665	Neurospora TF Circadian Clock - 2019Feb13ABC2	xc550-15	NCU04561	3	21.42	0.2		21.38	7.93	2.11	19.07	7.07	1.72		32.28	22.96		0.48	0.13
14665	Neurospora TF Circadian Clock - 2019Feb13ABC2	xc550-16	NCU04561	2	21.72	0.19		21.39	8.13	0.27	19.35	7.35	0.07		79.06	3.22		0.29	0.07
14665	Neurospora TF Circadian Clock - 2019Feb13ABC2	xc550-2	NCU04561	3	21.37	0.77		21.12	7.65	1.04	18.8	6.8	1.08		33.28	27.87		0.4	0.14
14665	Neurospora TF Circadian Clock - 2019Feb13ABC2	xc1047-1	NCU04729	3	21.33	0.49		22.06	8.56	0.58	19.6	7.6	0.1		46.92	10.76		0.19	0.04
14665	Neurospora TF Circadian Clock - 2019Feb13ABC2	xc1047-11	NCU04729	3	21.42	0.24		22.22	8.77	0.41	19.83	7.83	0.55		58.44	15.55		0.2	0.06
14665	Neurospora TF Circadian Clock - 2019Feb13ABC2	xc1047-12	NCU04729	3	21.36	0.25		21.61	8.12	0.95	19.23	7.23	0.64		88.48	39.52		0.29	0.06
14665	Neurospora TF Circadian Clock - 2019Feb13ABC2	xc1047-13	NCU04729	3	21.22	0.49		21.38	7.8	0.78	18.9	6.9	0.79		49.35	22.07		0.37	0.09
14665	Neurospora TF Circadian Clock - 2019Feb13ABC2	xc1047-14	NCU04729	3	21.75	0.06		21.77	8.53	0.86	19.73	7.73	0.84		80.84	35.3		0.27	0.06
14665	Neurospora TF Circadian Clock - 2019Feb13ABC2	xc1047-15	NCU04729	3	21.43	0.03		22.48	9.04	0.97	20.07	8.07	0.84		126.4	31.63		0.28	0.07
14665	Neurospora TF Circadian Clock - 2019Feb13ABC2	xc1047-2	NCU04729	3	21.5	0.06		21.96	8.56	1.52	19.67	7.67	1.35		78.07	54.35		0.21	0.05
14665	Neurospora TF Circadian Clock - 2019Feb13ABC2	xc683-1	NCU06068	3	21.45	0.68		20.68	7.25	0.63	18.47	6.47	0.21		62.89	30.79		0.25	0.05
14665	Neurospora TF Circadian Clock - 2019Feb13ABC2	xc683-11	NCU06068	3	21.25	0.71		19.72	6.17	0.62	17.47	5.47	1.04		63.02	44.67		0.22	0.05
14665	Neurospora TF Circadian Clock - 2019Feb13ABC2	xc683-12	NCU06068	3	20.95	0.21		22.38	8.64	0.59	19.53	7.53	0.61		35.43	15.2		0.29	0.07
14665	Neurospora TF Circadian Clock - 2019Feb13ABC2	xc683-13	NCU06068	3	21.66	0.11		20.68	7.38	0.74	18.67	6.67	0.64		55.28	31.52		0.15	0.04
14665	Neurospora TF Circadian Clock - 2019Feb13ABC2	xc683-14	NCU06068	3	20.55	0.72		22.62	8.61	0.4	19.37	7.37	0.83		29.38	22.02		0.4	0.13
14665	Neurospora TF Circadian Clock - 2019Feb13ABC2	xc683-15	NCU06068	3	21.4	0.18		20.52	7.07	0.73	18.3	6.3	0.5		82.7	21.94		0.19	0.05
14665	Neurospora TF Circadian Clock - 2019Feb13ABC2	xc683-2	NCU06068	3	20.99	0.05		22.07	8.35	0.8	19.3	7.3	0.66		36.61	19.91		0.25	0.06
14665	Neurospora TF Circadian Clock - 2019Feb13ABC2	xc683-3	NCU06068	3	21.44	0.14		21.12	7.69	0.95	18.87	6.87	0.72		40.44	22.65		0.27	0.06
14665	Neurospora TF Circadian Clock - 2019Feb13ABC2	xc668-1	NCU06407	3	21.64	0.1		21.63	8.32	0.53	19.5	7.5	0.4		34.72	9.48		0.3	0.06
14665	Neurospora TF Circadian Clock - 2019Feb13ABC2	xc668-11	NCU06407	3	21.93	0.13		21.34	8.21	0.59	19.5	7.5	0.44		57.88	8.23		0.22	0.04
14665	Neurospora TF Circadian Clock - 2019Feb13ABC2	xc668-12	NCU06407	3	21.59	1		21.01	7.67	1.22	18.87	6.87	0.25		32.01	23.41		0.35	0.1
14665	Neurospora TF Circadian Clock - 2019Feb13ABC2	xc668-13	NCU06407	3	21.89	0.16		20.83	7.67	0.57	19	7	0.53		62.18	10.15		0.2	0.05
14665	Neurospora TF Circadian Clock - 2019Feb13ABC2	xc668-14	NCU06407	3	22.1	0.48		21.26	8.23	1.3	19.57	7.57	0.85		35.67	4.62		0.28	0.06
14665	Neurospora TF Circadian Clock - 2019Feb13ABC2	xc668-15	NCU06407	3	21.07	1.21		21.96	8.29	1.28	19.23	7.23	0.06		39.46	28.78		0.41	0.14
14665	Neurospora TF Circadian Clock - 2019Feb13ABC2	xc668-16	NCU06407	3	21.81	0.27		21.79	8.58	0.59	19.8	7.8	0.35		45.86	13.79		0.29	0.06
14665	Neurospora TF Circadian Clock - 2019Feb13ABC2	xc668-17	NCU06407	3	21.91	0.09		20.77	7.62	0.48	18.97	6.97	0.4		47.81	4.03		0.23	0.05
14665	Neurospora TF Circadian Clock - 2019Feb13ABC2	xc668-18	NCU06407	3	21.36	0.33		22.1	8.62	0.36	19.67	7.67	0.42		41.16	26.75		0.33	0.1
14665	Neurospora TF Circadian Clock - 2019Feb13ABC2	xc668-19	NCU06407	3	22.01	0.18		20.71	7.62	0.23	19	7	0.36		69.95	13.63		0.28	0.06
14665	Neurospora TF Circadian Clock - 2019Feb13ABC2	xc668-2	NCU06407	3	21.88	0.15		21.21	8.05	0.37	19.33	7.33	0.21		29.91	2.75		0.24	0.06
14665	Neurospora TF Circadian Clock - 2019Feb13ABC2	xc679-1	NCU07139	3	21.58	0.14		21.06	7.72	0.52	18.93	6.93	0.38		43.25	12.19		0.37	0.06
14665	Neurospora TF Circadian Clock - 2019Feb13ABC2	xc679-11	NCU07139	3	21.74	0.16		21.35	8.1	0.85	19.33	7.33	0.72		24.74	8.79		0.4	0.08
14665	Neurospora TF Circadian Clock - 2019Feb13ABC2	xc679-12	NCU07139	3	21.8	0.45		19.78	6.57	0.44	17.97	5.97	0.15		57.8	11.99		0.19	0.05
14665	Neurospora TF Circadian Clock - 2019Feb13ABC2	xc679-2	NCU07139	3	21.77	0.03		20.62	7.39	0.34	18.7	6.7	0.3		46.75	2.68		0.33	0.06
14665	Neurospora TF Circadian Clock - 2019Feb13ABC2	xc672-1	NCU07788	3	21.87	0.22		20.79	7.62	0.73	18.93	6.93	0.47		80.09	13.04		0.25	0.05
14665	Neurospora TF Circadian Clock - 2019Feb13ABC2	xc672-11	NCU07788	3	21.01	1.32		21.8	8.09	2.34	19.5	7.5	1.64		54.71	49.02		0.42	0.17
14665	Neurospora TF Circadian Clock - 2019Feb13ABC2	xc672-12	NCU07788	3	21.4	0.06		21.65	8.19	0.55	19.3	7.3	0.46		47.27	8.74		0.26	0.06
14665	Neurospora TF Circadian Clock - 2019Feb13ABC2	xc672-13	NCU07788	3	21.44	0.58		20.99	7.56	1.42	18.73	6.73	0.87		55.28	19.91		0.25	0.06
14665	Neurospora TF Circadian Clock - 2019Feb13ABC2	xc672-14	NCU07788	3	20.84	0.22		21.26	7.44	0.13	18.47	6.47	0.21		38.05	12.22		0.37	0.09
14665	Neurospora TF Circadian Clock - 2019Feb13ABC2	xc931-1	NCU08049	3	21.71	0.27		20.35	7.09	1.07	18.4	6.4	0.75		90.18	30.62		0.2	0.05
14665	Neurospora TF Circadian Clock - 2019Feb13ABC2	xc931-11	NCU08049	3	21.28	0.58		20.12	6.59	0.46	17.83	5.83	0.32		69.1	53.66		0.23	0.06
14665	Neurospora TF Circadian Clock - 2019Feb13ABC2	xc931-12	NCU08049	3	20.94	0.23		21.36	7.61	0.41	18.63	6.63	0.47		24.87	16.08		0.49	0.11
14665	Neurospora TF Circadian Clock - 2019Feb13ABC2	xc931-13	NCU08049	3	21.55	0.56		20.54	7.17	0.54	18.43	6.43	0.12		46.22	28.25		0.32	0.08
14665	Neurospora TF Circadian Clock - 2019Feb13ABC2	xc931-14	NCU08049	3	21.74	0.35		20.84	7.6	1.06	18.87	6.87	0.67		44.1	28.01		0.29	0.07
14665	Neurospora TF Circadian Clock - 2019Feb13ABC2	xc931-2	NCU08049	3	21.78	0.26		20.57	7.35	0.67	18.67	6.67	0.38		98.12	35.86		0.36	0.07
14665	Neurospora TF Circadian Clock - 2019Feb13ABC2	xc601-1	NCU09252	3	21.25	0.26		22	8.45	2.12	19.47	7.47	1.64		19.35	2.67		0.46	0.1
14665	Neurospora TF Circadian Clock - 2019Feb13ABC2	xc601-11	NCU09252	3	20.89	0.13		23.1	9.32	1.2	20.1	8.1	1.04		23.83	21.15		0.4	0.08
14665	Neurospora TF Circadian Clock - 2019Feb13ABC2	xc601-12	NCU09252	3	20.71	0.36		22.61	8.7	1.48	19.5	7.5	1.01		45.36	18.94		0.4	0.14
14665	Neurospora TF Circadian Clock - 2019Feb13ABC2	xc601-13	NCU09252	3	20.35	1.05		22.88	8.73	0.85	19.4	7.4	1.15		11.4	10.79		0.59	0.22
14665	Neurospora TF Circadian Clock - 2019Feb13ABC2	xc601-14	NCU09252	3	21.26	0.51		23.44	9.89	4.08	20.9	8.9	3.42		24.43	10.97		0.36	0.1
14665	Neurospora TF Circadian Clock - 2019Feb13ABC2	xc601-2	NCU09252	3	21.81	0.18		21.16	7.96	0.71	19.23	7.23	0.7		44.05	5.63		0.17	0.04
14665	Neurospora TF Circadian Clock - 2019Feb13ABC2	x654-14	WT	9	21.83	0.37		20.35	7.16	1.23	18.5	6.5	0.85		75.99	28.55		0.27	0.06
14665	Neurospora TF Circadian Clock - 2019Feb13ABC2	x654-16	WT	9	21.86	0.22		19.51	6.33	0.72	17.77	5.77	0.48		78.75	20.96		0.22	0.05
14665	Neurospora TF Circadian Clock - 2019Feb13ABC2	x661-4	WT	9	21.82	0.22		20.51	7.31	0.76	18.64	6.64	0.55		46.56	17.77		0.24	0.06
14665	Neurospora TF Circadian Clock - 2019Feb13ABC2	x661-5	WT	9	21.61	0.37		20.44	7.11	1.02	18.4	6.4	0.9		65.34	34.71		0.25	0.05
14661	Neurospora TF Circadian Clock - 2019Jun02ABC2	xc674-1	NCU01097	3	21.69	0.1		20.54	7.26	0.53	18.57	6.57	0.42		112.2	21.29		0.24	0.05
14661	Neurospora TF Circadian Clock - 2019Jun02ABC2	xc674-11	NCU01097	3	21.82	0.16		20.49	7.29	0.68	18.63	6.63	0.51		77.18	15.54		0.21	0.05
14661	Neurospora TF Circadian Clock - 2019Jun02ABC2	xc674-2	NCU01097	3	21.58	0.26		20.73	7.38	1.24	18.63	6.63	0.9		122.5	26.47		0.33	0.08
14661	Neurospora TF Circadian Clock - 2019Jun02ABC2	xc674-3	NCU01097	3	21.59	0.23		21.09	7.75	0.74	18.97	6.97	0.47		99.75	27.23		0.18	0.04
14661	Neurospora TF Circadian Clock - 2019Jun02ABC2	xc1088-1	NCU01209	3	21.26	0.14		20.33	6.78	1.26	18	6	1.01		66.73	9.6		0.19	0.04
14661	Neurospora TF Circadian Clock - 2019Jun02ABC2	xc1088-11	NCU01209	3	21.52	0.13		19	5.62	0.39	17.03	5.03	0.25		110	30.58		0.22	0.04
14661	Neurospora TF Circadian Clock - 2019Jun02ABC2	xc1088-2	NCU01209	3	21.2	0.1		19.89	6.31	0.78	17.57	5.57	0.64		55.82	16		0.22	0.05
14661	Neurospora TF Circadian Clock - 2019Jun02ABC2	xc1088-3	NCU01209	3	21.32	0.21		20.12	6.61	0.9	17.87	5.87	0.71		99.35	30.58		0.24	0.05
14661	Neurospora TF Circadian Clock - 2019Jun02ABC2	xc452-1	NCU01312	3	21.41	0.48		21.16	7.71	0.43	18.87	6.87	0.06		74.56	7.92		0.16	0.04
14661	Neurospora TF Circadian Clock - 2019Jun02ABC2	xc452-11	NCU01312	3	21.37	0.27		20.29	6.82	0.7	18.07	6.07	0.47		93.58	5.54		0.18	0.05
14661	Neurospora TF Circadian Clock - 2019Jun02ABC2	xc452-12	NCU01312	3	21.08	0.18		21.85	8.19	0.99	19.2	7.2	0.95		48.44	20.62		0.33	0.07
14661	Neurospora TF Circadian Clock - 2019Jun02ABC2	xc452-13	NCU01312	3	21.07	0.21		20.59	6.93	1.03	18.07	6.07	0.74		83.42	18.87		0.22	0.05
14661	Neurospora TF Circadian Clock - 2019Jun02ABC2	xc452-2	NCU01312	3	21.45	0.36		21.98	8.55	1.53	19.63	7.63	1.15		92.94	35.65		0.23	0.05
14661	Neurospora TF Circadian Clock - 2019Jun02ABC2	xc452-3	NCU01312	3	21.46	0.32		21.04	7.62	1.49	18.8	6.8	1.04		97.22	21.55		0.21	0.05
14661	Neurospora TF Circadian Clock - 2019Jun02ABC2	xc932-1	NCU02307	3	20.81	0.11		21.22	7.38	0.64	18.4	6.4	0.46		77.98	7.71		0.27	0.06
14661	Neurospora TF Circadian Clock - 2019Jun02ABC2	xc932-11	NCU02307	3	21.06	0.18		19.9	6.22	0.35	17.47	5.47	0.25		125.6	16.42		0.21	0.05
14661	Neurospora TF Circadian Clock - 2019Jun02ABC2	xc932-12	NCU02307	3	20.89	0.24		21.19	7.4	1.26	18.43	6.43	0.87		105	18.08		0.27	0.06
14661	Neurospora TF Circadian Clock - 2019Jun02ABC2	xc932-13	NCU02307	3	20.88	0.1		20.5	6.7	0.48	17.83	5.83	0.38		90.78	26.42		0.37	0.08
14661	Neurospora TF Circadian Clock - 2019Jun02ABC2	xc932-2	NCU02307	3	20.84	0.26		20.5	6.68	0.73	17.8	5.8	0.44		100.3	18.75		0.14	0.04
14661	Neurospora TF Circadian Clock - 2019Jun02ABC2	xc932-3	NCU02307	3	20.86	0.17		21.24	7.43	0.65	18.47	6.47	0.64		65.51	17.67		0.21	0.05
14661	Neurospora TF Circadian Clock - 2019Jun02ABC2	xc681-11	NCU03320	3	21.43	0.44		22.1	8.66	0.29	19.73	7.73	0.15		199.2	50.35		0.26	0.06
14661	Neurospora TF Circadian Clock - 2019Jun02ABC2	xc681-12	NCU03320	3	21.25	0.09		21.15	7.6	0.2	18.73	6.73	0.12		68.42	10.29		0.26	0.06
14661	Neurospora TF Circadian Clock - 2019Jun02ABC2	xc681-15	NCU03320	3	21.12	0.15		23.18	9.55	0.66	20.4	8.4	0.69		75.81	15.12		0.19	0.04
14661	Neurospora TF Circadian Clock - 2019Jun02ABC2	xc1096-1	NCU03352	3	21.44	0.21		22.81	9.38	1.79	20.45	8.45	1.55		28.11	15.1		0.27	0.07
14661	Neurospora TF Circadian Clock - 2019Jun02ABC2	xc1096-11	NCU03352	3	21.4	0.25		22.21	8.75	1.21	19.8	7.8	0.85		39.77	10		0.28	0.07
14661	Neurospora TF Circadian Clock - 2019Jun02ABC2	xc1096-12	NCU03352	3	21.46	0.35		22.58	9.16	2.06	20.17	8.17	1.54		18.56	11.54		0.33	0.09
14661	Neurospora TF Circadian Clock - 2019Jun02ABC2	xc1096-13	NCU03352	3	21.67	0.03		21.11	7.82	0.2	19.07	7.07	0.15		47.25	4.09		0.2	0.05
14661	Neurospora TF Circadian Clock - 2019Jun02ABC2	xc1096-14	NCU03352	3	21.66	0.3		21.85	8.55	2.03	19.81	7.81	1.75		33.93	16.33		0.27	0.07
14661	Neurospora TF Circadian Clock - 2019Jun02ABC2	xc1096-2	NCU03352	3	21.43	0.34		23.19	9.75	1.17	20.8	8.8	0.85		33.55	5.18		0.27	0.07
14661	Neurospora TF Circadian Clock - 2019Jun02ABC2	xc1096-3	NCU03352	3	21.53	0.38		22.24	8.86	1.81	19.93	7.93	1.29		50.1	14.4		0.23	0.06
14661	Neurospora TF Circadian Clock - 2019Jun02ABC2	xc618-1	NCU04211	3	21.6	0.2		21.78	8.44	1.08	19.6	7.6	0.8		89.74	24.47		0.18	0.04
14661	Neurospora TF Circadian Clock - 2019Jun02ABC2	xc618-11	NCU04211	3	21.05	0.31		21.71	8.03	0.86	19.03	7.03	0.64		60.98	5.96		0.24	0.06
14661	Neurospora TF Circadian Clock - 2019Jun02ABC2	xc618-12	NCU04211	3	21.56	0.33		20.3	6.95	0.49	18.23	6.23	0.21		94.74	28.28		0.17	0.04
14661	Neurospora TF Circadian Clock - 2019Jun02ABC2	xc618-2	NCU04211	3	21.55	0.18		20.65	7.28	0.83	18.53	6.53	0.59		98.91	22.98		0.18	0.04
14661	Neurospora TF Circadian Clock - 2019Jun02ABC2	xc618-3	NCU04211	3	21.8	0.51		20.12	6.91	0.9	18.27	6.27	0.38		130.8	35.26		0.18	0.04
14661	Neurospora TF Circadian Clock - 2019Jun02ABC2	xc627-1	NCU04628	3	20.98	0.1		23.53	9.8	0.99	20.6	8.6	0.82		114.7	42.29		0.28	0.06
14661	Neurospora TF Circadian Clock - 2019Jun02ABC2	xc627-13	NCU04628	3	20.88	0.16		22.11	8.32	0.49	19.23	7.23	0.29		91.19	13.82		0.4	0.09
14661	Neurospora TF Circadian Clock - 2019Jun02ABC2	xc627-14	NCU04628	3	20.78	0.38		22.46	8.6	1.26	19.43	7.43	0.76		54.28	22.66		0.47	0.1
14661	Neurospora TF Circadian Clock - 2019Jun02ABC2	xc627-15	NCU04628	3	20.17	1.01		1.24	10.96	2.77	1.25	9.42	1.87		52.26	22.77		0.48	0.18
14661	Neurospora TF Circadian Clock - 2019Jun02ABC2	xc627-17	NCU04628	3	21.34	0.23		21.15	7.66	0.64	18.8	6.8	0.44		68.15	5.66		0.37	0.08
14661	Neurospora TF Circadian Clock - 2019Jun02ABC2	xc677-1	NCU05767	3	20.99	0.15		21.46	7.74	1.18	18.77	6.77	1.01		78.33	12.92		0.19	0.05
14661	Neurospora TF Circadian Clock - 2019Jun02ABC2	xc677-11	NCU05767	3	21.65	0.4		20.15	6.85	1.22	18.17	6.17	0.76		66.22	10.01		0.21	0.05
14661	Neurospora TF Circadian Clock - 2019Jun02ABC2	xc677-12	NCU05767	3	21.49	0.44		20.61	7.2	1.68	18.43	6.43	1.17		85.45	21.26		0.23	0.05
14661	Neurospora TF Circadian Clock - 2019Jun02ABC2	xc677-13	NCU05767	3	21.83	0.28		19.98	6.78	0.86	18.17	6.17	0.55		105.8	26.77		0.25	0.05
14661	Neurospora TF Circadian Clock - 2019Jun02ABC2	xc677-14	NCU05767	3	21.72	0.07		19.63	6.38	0.31	17.77	5.77	0.31		115.4	12.51		0.18	0.05
14661	Neurospora TF Circadian Clock - 2019Jun02ABC2	xc677-15	NCU05767	3	21.54	0.34		20.3	6.93	1.6	18.2	6.2	1.15		63.24	18.89		0.29	0.06
14661	Neurospora TF Circadian Clock - 2019Jun02ABC2	xc677-2	NCU05767	3	21.21	0.17		21.46	7.89	0.16	18.97	6.97	0.29		66.87	8.12		0.23	0.06
14661	Neurospora TF Circadian Clock - 2019Jun02ABC2	xc677-3	NCU05767	3	21.62	0.22		20.13	6.8	0.37	18.13	6.13	0.23		88.16	8.41		0.24	0.05
14661	Neurospora TF Circadian Clock - 2019Jun02ABC2	xc598-1	NCU06744	3	21.86	0.31		19.54	6.37	0.38	17.8	5.8	0.17		65.54	9.2		0.18	0.05
14661	Neurospora TF Circadian Clock - 2019Jun02ABC2	xc598-11	NCU06744	3	21.41	0.08		19.66	6.21	1.37	17.53	5.53	1.18		66.95	16.17		0.23	0.06
14661	Neurospora TF Circadian Clock - 2019Jun02ABC2	xc598-12	NCU06744	3	21.4	0.21		19.59	6.13	0.77	17.47	5.47	0.55		73.37	11.29		0.14	0.04
14661	Neurospora TF Circadian Clock - 2019Jun02ABC2	xc598-13	NCU06744	3	21.43	0.11		20.5	7.06	1.56	18.3	6.3	1.3		51.19	27.72		0.26	0.06
14661	Neurospora TF Circadian Clock - 2019Jun02ABC2	xc598-14	NCU06744	3	21.5	0.22		20.33	6.93	1.27	18.2	6.2	0.95		73.94	29.06		0.31	0.06
14661	Neurospora TF Circadian Clock - 2019Jun02ABC2	xc598-15	NCU06744	3	21.87	0.12		19.28	6.11	0.32	17.57	5.57	0.25		116.9	12		0.17	0.04
14661	Neurospora TF Circadian Clock - 2019Jun02ABC2	xc598-2	NCU06744	3	21.4	0.14		20.38	6.92	1.15	18.17	6.17	0.91		70.97	11.98		0.2	0.05
14661	Neurospora TF Circadian Clock - 2019Jun02ABC2	xc598-3	NCU06744	3	20.99	0.13		21.61	7.89	0.5	18.9	6.9	0.4		66.13	12.41		0.3	0.06
14661	Neurospora TF Circadian Clock - 2019Jun02ABC2	xc1061-1	NCU08899	3	21.49	0.07		19.84	6.44	0.39	17.77	5.77	0.29		124	18.19		0.23	0.05
14661	Neurospora TF Circadian Clock - 2019Jun02ABC2	xc1061-11	NCU08899	3	21.4	0.17		19.07	5.61	0.56	17	5	0.36		136.8	30.83		0.28	0.05
14661	Neurospora TF Circadian Clock - 2019Jun02ABC2	xc1061-12	NCU08899	3	21.46	0.22		20.4	6.98	0.75	18.23	6.23	0.49		133.7	26.98		0.25	0.05
14661	Neurospora TF Circadian Clock - 2019Jun02ABC2	xc1061-13	NCU08899	3	21.65	0.15		19.47	6.16	0.46	17.57	5.57	0.35		124.4	36.36		0.19	0.04
14661	Neurospora TF Circadian Clock - 2019Jun02ABC2	xc1061-2	NCU08899	3	21.49	0.05		20.43	7.02	0.18	18.3	6.3	0.2		120.9	23.51		0.37	0.08
14661	Neurospora TF Circadian Clock - 2019Jun02ABC2	xc1061-3	NCU08899	3	21.56	0.14		19.08	5.72	0.56	17.13	5.13	0.42		188.6	19.1		0.22	0.05
14661	Neurospora TF Circadian Clock - 2019Jun02ABC2	x654-14	WT	9	21.18	0.22		19.87	6.28	0.85	17.53	5.53	0.66		84.87	29.31		0.19	0.04
14661	Neurospora TF Circadian Clock - 2019Jun02ABC2	x654-16	WT	9	21.57	0.27		19.32	5.96	0.53	17.37	5.37	0.41		131	26.89		0.19	0.04
14661	Neurospora TF Circadian Clock - 2019Jun02ABC2	x661-4	WT	9	21.38	0.4		19.86	6.39	0.97	17.68	5.68	0.62		85.96	21.08		0.18	0.04
14661	Neurospora TF Circadian Clock - 2019Jun02ABC2	x661-5	WT	9	21.33	0.39		20.3	6.8	0.79	18.03	6.03	0.48		113.6	24.44		0.22	0.05
14714	Neurospora TF Circadian Clock - 2019Jun24JKL1	xc458-4	NCU00144	3	21.74	0.55		20.78	7.53	1.63	18.8	6.8	0.98		43.79	11.36		0.26	0.05
14714	Neurospora TF Circadian Clock - 2019Jun24JKL1	xc458-5	NCU00144	3	21.81	0.31		20.29	7.09	0.69	18.43	6.43	0.49		53.19	12.84		0.21	0.05
14714	Neurospora TF Circadian Clock - 2019Jun24JKL1	xc458-6	NCU00144	3	21.96	0.11		20	6.89	0.43	18.3	6.3	0.36		49.78	4.24		0.25	0.05
14714	Neurospora TF Circadian Clock - 2019Jun24JKL1	xc458-7	NCU00144	3	21.56	0.23		20.74	7.38	0.32	18.63	6.63	0.12		59.74	6.64		0.22	0.04
14714	Neurospora TF Circadian Clock - 2019Jun24JKL1	xc2273-11	NCU00180	3	21.92	0.4		19.14	6	1.16	17.47	5.47	0.76		62.51	25.62		0.23	0.06
14714	Neurospora TF Circadian Clock - 2019Jun24JKL1	xc2273-12	NCU00180	3	21.74	0.26		20.28	7.03	0.87	18.37	6.37	0.57		75.95	13.55		0.2	0.05
14714	Neurospora TF Circadian Clock - 2019Jun24JKL1	xc2273-13	NCU00180	3	22	0.45		18.2	5.11	2.81	16.65	4.65	2.28		47.82	24.36		0.34	0.09
14714	Neurospora TF Circadian Clock - 2019Jun24JKL1	xc2273-14	NCU00180	3	22.23	0.31		19.76	6.8	0.53	18.3	6.3	0.46		41.93	4.69		0.29	0.06
14714	Neurospora TF Circadian Clock - 2019Jun24JKL1	xc1251-1	NCU02386	3	22.03	0.21		19.86	6.79	0.61	18.23	6.23	0.4		93.46	10.45		0.23	0.05
14714	Neurospora TF Circadian Clock - 2019Jun24JKL1	xc1251-11	NCU02386	3	21.75	0.44		20.17	6.93	0.85	18.27	6.27	0.4		111.4	27.27		0.23	0.05
14714	Neurospora TF Circadian Clock - 2019Jun24JKL1	xc1251-12	NCU02386	3	21.55	0.12		20.64	7.27	0.2	18.53	6.53	0.15		80.11	18.28		0.24	0.05
14714	Neurospora TF Circadian Clock - 2019Jun24JKL1	xc1251-13	NCU02386	3	22.05	0.13		19.41	6.35	0.49	17.83	5.83	0.4		85.56	18.84		0.2	0.05
14714	Neurospora TF Circadian Clock - 2019Jun24JKL1	xc1251-14	NCU02386	3	21.49	0.36		20.41	7.01	0.48	18.27	6.27	0.15		108.3	18.93		0.17	0.04
14714	Neurospora TF Circadian Clock - 2019Jun24JKL1	xc1251-15	NCU02386	3	21.65	0.22		20.29	6.98	0.64	18.3	6.3	0.4		87.52	35.6		0.28	0.05
14714	Neurospora TF Circadian Clock - 2019Jun24JKL1	xc1251-2	NCU02386	3	21.75	0.14		20.85	7.61	0.51	18.9	6.9	0.35		119.9	20.67		0.2	0.05
14714	Neurospora TF Circadian Clock - 2019Jun24JKL1	xc1251-3	NCU02386	3	21.85	0.1		20.21	7.03	0.43	18.4	6.4	0.46		113.2	26.56		0.2	0.05
14714	Neurospora TF Circadian Clock - 2019Jun24JKL1	xc1045-1	NCU03649	3	21.47	0.27		21.28	7.87	0.39	19.03	7.03	0.15		56.02	4.98		0.25	0.05
14714	Neurospora TF Circadian Clock - 2019Jun24JKL1	xc1045-11	NCU03649	3	21.92	0.06		19.93	6.79	0.4	18.2	6.2	0.36		84.97	9		0.24	0.05
14714	Neurospora TF Circadian Clock - 2019Jun24JKL1	xc1045-12	NCU03649	3	21.47	0.23		20.58	7.17	0.81	18.4	6.4	0.53		76.71	9.74		0.25	0.05
14714	Neurospora TF Circadian Clock - 2019Jun24JKL1	xc1045-13	NCU03649	3	21.57	0.28		20.55	7.2	0.34	18.47	6.47	0.15		149.5	23.47		0.23	0.05
14714	Neurospora TF Circadian Clock - 2019Jun24JKL1	xc1045-2	NCU03649	3	21.82	0.16		20.1	6.9	0.7	18.27	6.27	0.5		90.13	15.4		0.25	0.05
14714	Neurospora TF Circadian Clock - 2019Jun24JKL1	xc1045-3	NCU03649	3	21.73	0.31		20.4	7.15	1	18.47	6.47	0.64		89.11	33.51		0.18	0.04
14714	Neurospora TF Circadian Clock - 2019Jun24JKL1	xc1045-4	NCU03649	3	21.3	0.19		21.04	7.52	0.73	18.67	6.67	0.49		82.44	20.07		0.25	0.05
14714	Neurospora TF Circadian Clock - 2019Jun24JKL1	xc1256-1	NCU04022	3	21.64	0.15		21.48	8.17	0.63	19.37	7.37	0.51		62.64	22.4		0.27	0.07
14714	Neurospora TF Circadian Clock - 2019Jun24JKL1	xc1256-2	NCU04022	3	21.57	0.35		20.55	7.2	1.03	18.47	6.47	0.67		44.67	2.84		0.28	0.06
14714	Neurospora TF Circadian Clock - 2019Jun24JKL1	xc1256-3	NCU04022	3	21.51	0.11		22.46	9.07	0.32	20.13	8.13	0.25		117.4	30.64		0.3	0.07
14714	Neurospora TF Circadian Clock - 2019Jun24JKL1	xc1256-4	NCU04022	3	21.83	0.12		22.65	9.45	0.25	20.6	8.6	0.17		147	24.13		0.23	0.06
14714	Neurospora TF Circadian Clock - 2019Jun24JKL1	xc2266-11	NCU05025	3	21.48	0.17		21.2	7.79	0.49	18.97	6.97	0.32		51.64	15.32		0.35	0.07
14714	Neurospora TF Circadian Clock - 2019Jun24JKL1	xc2266-12	NCU05025	3	21.62	0.28		20.36	7.04	1.06	18.33	6.33	0.72		70.16	17.97		0.22	0.05
14714	Neurospora TF Circadian Clock - 2019Jun24JKL1	xc2266-14	NCU05025	3	22.14	0.41		19.99	6.98	1.04	18.43	6.43	0.64		75.55	13.21		0.24	0.06
14714	Neurospora TF Circadian Clock - 2019Jun24JKL1	xc2266-15	NCU05025	3	21.89	0.54		20.08	6.92	1.09	18.3	6.3	0.56		55.46	19.37		0.27	0.06
14714	Neurospora TF Circadian Clock - 2019Jun24JKL1	xc465-1	NCU05637	3	21.5	0.21		20.87	7.48	0.42	18.7	6.7	0.2		24.44	7.56		0.33	0.07
14714	Neurospora TF Circadian Clock - 2019Jun24JKL1	xc465-2	NCU05637	3	21.3	0.18		21.94	8.42	0.24	19.47	7.47	0.06		39.73	3.51		0.29	0.06
14714	Neurospora TF Circadian Clock - 2019Jun24JKL1	xc465-3	NCU05637	3	21.37	0.55		21.55	8.07	1.2	19.17	7.17	0.59		53.98	4.26		0.26	0.06
14714	Neurospora TF Circadian Clock - 2019Jun24JKL1	xc465-4	NCU05637	3	21.9	0.16		19.69	6.54	0.26	17.97	5.97	0.32		65.49	6.06		0.2	0.05
14714	Neurospora TF Circadian Clock - 2019Jun24JKL1	xc455-1	NCU07728	3	21.83	0.24		21.04	7.85	0.36	19.13	7.13	0.15		47.69	6.39		0.28	0.06
14714	Neurospora TF Circadian Clock - 2019Jun24JKL1	xc455-11	NCU07728	3	21.75	0.08		21.04	7.8	0.22	19.07	7.07	0.25		35.54	10.02		0.46	0.1
14714	Neurospora TF Circadian Clock - 2019Jun24JKL1	xc455-12	NCU07728	3	22.22	0.38		19.53	6.57	1.24	18.07	6.07	0.83		73.61	18.04		0.25	0.05
14714	Neurospora TF Circadian Clock - 2019Jun24JKL1	xc455-13	NCU07728	3	21.96	0.25		20.44	7.32	0.89	18.7	6.7	0.61		69.19	20.75		0.24	0.05
14714	Neurospora TF Circadian Clock - 2019Jun24JKL1	xc455-2	NCU07728	3	21.87	0.17		20.2	7.03	0.54	18.4	6.4	0.36		63.65	6.38		0.22	0.05
14714	Neurospora TF Circadian Clock - 2019Jun24JKL1	xc455-3	NCU07728	3	21.9	0.26		20.65	7.5	0.67	18.83	6.83	0.4		59.53	13.44		0.26	0.05
14714	Neurospora TF Circadian Clock - 2019Jun24JKL1	xc455-4	NCU07728	3	21.81	0.25		21.02	7.81	0.44	19.1	7.1	0.2		70.78	10.1		0.18	0.04
14714	Neurospora TF Circadian Clock - 2019Jun24JKL1	xc1258-11	NCU07893	3	21.98	0.1		19.72	6.62	0.46	18.07	6.07	0.4		67.86	11.29		0.21	0.05
14714	Neurospora TF Circadian Clock - 2019Jun24JKL1	xc1258-12	NCU07893	3	21.93	0.13		19.59	6.46	0.46	17.9	5.9	0.35		105.2	6.63		0.21	0.05
14714	Neurospora TF Circadian Clock - 2019Jun24JKL1	xc1258-13	NCU07893	3	21.92	0.39		19.71	6.57	0.54	18	6	0.17		84.98	8.59		0.25	0.05
14714	Neurospora TF Circadian Clock - 2019Jun24JKL1	xc1258-14	NCU07893	3	21.63	0.08		20.08	6.77	0.72	18.1	6.1	0.7		49.51	23.22		0.19	0.04
14714	Neurospora TF Circadian Clock - 2019Jun24JKL1	xc1258-15	NCU07893	3	21.75	0.21		19.64	6.4	0.38	17.8	5.8	0.17		76.66	11.31		0.22	0.05
14714	Neurospora TF Circadian Clock - 2019Jun24JKL1	xc1258-16	NCU07893	3	21.59	0.28		20.98	7.64	0.92	18.87	6.87	0.59		48.39	15.35		0.28	0.05
14714	Neurospora TF Circadian Clock - 2019Jun24JKL1	xc399-11	NCU09829	3	21.54	0.29		21.03	7.65	1.01	18.87	6.87	0.71		44.19	6.54		0.24	0.06
14714	Neurospora TF Circadian Clock - 2019Jun24JKL1	xc399-12	NCU09829	3	21.21	0.22		21.47	7.89	0.76	18.97	6.97	0.49		45.01	14.32		0.27	0.06
14714	Neurospora TF Circadian Clock - 2019Jun24JKL1	xc399-13	NCU09829	3	21.58	0.28		20.58	7.23	0.44	18.5	6.5	0.2		57.32	11.63		0.21	0.05
14714	Neurospora TF Circadian Clock - 2019Jun24JKL1	xc399-14	NCU09829	3	21.67	0.25		20.46	7.17	0.49	18.47	6.47	0.32		68.34	7.47		0.25	0.05
14714	Neurospora TF Circadian Clock - 2019Jun24JKL1	xc399-15	NCU09829	3	21.74	0.33		20.46	7.21	0.47	18.53	6.53	0.21		40.77	11.18		0.22	0.04
14714	Neurospora TF Circadian Clock - 2019Jun24JKL1	xc2269-11	NCU10597	3	22.05	0.44		19.23	6.17	0.61	17.67	5.67	0.21		47.65	3.84		0.25	0.06
14714	Neurospora TF Circadian Clock - 2019Jun24JKL1	xc2269-12	NCU10597	3	21.87	0.34		20.24	7.07	1.1	18.43	6.43	0.71		75.79	2.47		0.27	0.06
14714	Neurospora TF Circadian Clock - 2019Jun24JKL1	xc2269-13	NCU10597	3	21.8	0.42		19.94	6.73	1.16	18.1	6.1	0.7		59.03	7.33		0.22	0.04
14714	Neurospora TF Circadian Clock - 2019Jun24JKL1	xc2269-14	NCU10597	3	21.82	0.24		19.98	6.79	0.51	18.17	6.17	0.29		47.42	2.62		0.23	0.05
14714	Neurospora TF Circadian Clock - 2019Jun24JKL1	xc2269-15	NCU10597	3	21.77	0.28		19.62	6.39	0.65	17.8	5.8	0.44		52.13	2.13		0.25	0.06
14714	Neurospora TF Circadian Clock - 2019Jun24JKL1	xc2269-16	NCU10597	3	21.6	0.17		20.52	7.19	0.32	18.47	6.47	0.15		65.16	15.95		0.26	0.05
14714	Neurospora TF Circadian Clock - 2019Jun24JKL1	xc2264-11	NCU10697	3	21.82	0.49		20	6.8	1.19	18.17	6.17	0.67		90.54	22.81		0.27	0.07
14714	Neurospora TF Circadian Clock - 2019Jun24JKL1	xc2264-12	NCU10697	3	21.35	0.21		21.51	8.01	0.44	19.13	7.13	0.21		68.13	6.44		0.28	0.06
14714	Neurospora TF Circadian Clock - 2019Jun24JKL1	xc2264-13	NCU10697	3	21.56	0.05		20.93	7.57	0.67	18.8	6.8	0.56		96.54	13.39		0.26	0.06
14714	Neurospora TF Circadian Clock - 2019Jun24JKL1	xc2264-14	NCU10697	3	22.08	0.15		20.69	7.64	0.16	19.03	7.03	0.23		58.62	14.59		0.37	0.08
14714	Neurospora TF Circadian Clock - 2019Jun24JKL1	xc2264-15	NCU10697	3	21.4	0.25		20.98	7.53	0.57	18.7	6.7	0.3		67.04	5.81		0.37	0.09
14714	Neurospora TF Circadian Clock - 2019Jun24JKL1	xc2264-16	NCU10697	3	21.56	0.03		20.66	7.3	0.3	18.57	6.57	0.25		82.36	3.49		0.22	0.05
14714	Neurospora TF Circadian Clock - 2019Jun24JKL1	x654-14	WT	9	21.78	0.24		19.8	6.58	0.59	17.97	5.97	0.39		57.84	19.41		0.25	0.05
14714	Neurospora TF Circadian Clock - 2019Jun24JKL1	x654-16	WT	9	21.54	0.19		21.03	7.65	0.47	18.88	6.88	0.39		75.56	31.17		0.23	0.05
14714	Neurospora TF Circadian Clock - 2019Jun24JKL1	x661-4	WT	9	21.65	0.22		20.65	7.35	0.88	18.62	6.62	0.66		58.18	22.31		0.29	0.06
14714	Neurospora TF Circadian Clock - 2019Jun24JKL1	x661-5	WT	9	21.58	0.18		20.03	6.68	1.05	18	6	0.82		56.08	12.91		0.24	0.06
14778	Neurospora TF Circadian Clock - 2019Jun28ABDC2	xc604-1	NCU00019	3	21.73	0.18		21.91	8.66	0.1	19.83	7.83	0.12		86.36	8.18		0.25	0.06
14778	Neurospora TF Circadian Clock - 2019Jun28ABDC2	xc604-11	NCU00019	3	21.84	0.16		20.44	7.25	0.26	18.6	6.6	0.1		122	14.26		0.21	0.05
14778	Neurospora TF Circadian Clock - 2019Jun28ABDC2	xc604-12	NCU00019	3	22.06	0.22		19.54	6.48	0.77	17.97	5.97	0.74		102.2	9.46		0.2	0.04
14778	Neurospora TF Circadian Clock - 2019Jun28ABDC2	xc604-13	NCU00019	3	21.65	0.42		21.15	7.85	0.73	19.07	7.07	0.29		70.73	11.41		0.22	0.05
14778	Neurospora TF Circadian Clock - 2019Jun28ABDC2	xc604-14	NCU00019	3	21.77	0.15		20.36	7.13	0.28	18.47	6.47	0.38		107	4.38		0.25	0.05
14778	Neurospora TF Circadian Clock - 2019Jun28ABDC2	xc604-15	NCU00019	3	21.64	0.23		19.7	6.39	0.53	17.77	5.77	0.31		83.17	15.58		0.19	0.05
14778	Neurospora TF Circadian Clock - 2019Jun28ABDC2	xc604-2	NCU00019	3	22.1	0.37		19.67	6.64	1.08	18.1	6.1	0.69		82	23.32		0.27	0.06
14778	Neurospora TF Circadian Clock - 2019Jun28ABDC2	xc604-3	NCU00019	3	21.46	0.17		20.96	7.54	0.58	18.73	6.73	0.38		76.06	8.42		0.26	0.05
14778	Neurospora TF Circadian Clock - 2019Jun28ABDC2	xc604-4	NCU00019	3	21.34	0.29		20.81	7.31	0.81	18.5	6.5	0.53		66.77	15.72		0.24	0.05
14778	Neurospora TF Circadian Clock - 2019Jun28ABDC2	xc604-5	NCU00019	3	21.87	0.34		20.2	7.03	0.74	18.4	6.4	0.4		66.78	31.71		0.21	0.05
14778	Neurospora TF Circadian Clock - 2019Jun28ABDC2	xc604-6	NCU00019	3	21.54	0.41		20.85	7.48	1.06	18.7	6.7	0.61		83.43	14.99		0.21	0.04
14778	Neurospora TF Circadian Clock - 2019Jun28ABDC2	xc614-1	NCU00285	3	21.65	0.31		22.1	8.8	0.35	19.93	7.93	0.21		79.69	31.8		0.35	0.09
14778	Neurospora TF Circadian Clock - 2019Jun28ABDC2	xc614-11	NCU00285	3	21.23	0.1		21.86	8.3	0.49	19.33	7.33	0.35		74.84	23.04		0.34	0.08
14778	Neurospora TF Circadian Clock - 2019Jun28ABDC2	xc614-12	NCU00285	3	21.29	0.18		22.36	8.84	0.7	19.83	7.83	0.46		95.96	36.35		0.32	0.07
14778	Neurospora TF Circadian Clock - 2019Jun28ABDC2	xc614-13	NCU00285	3	20.95	0.41		21.59	7.85	0.88	18.83	6.83	0.47		94.78	14.8		0.29	0.06
14778	Neurospora TF Circadian Clock - 2019Jun28ABDC2	xc614-14	NCU00285	3	21.31	0.33		21.22	7.7	0.51	18.83	6.83	0.21		130.3	70.78		0.31	0.07
14778	Neurospora TF Circadian Clock - 2019Jun28ABDC2	xc614-15	NCU00285	3	21.35	0.25		21.93	8.44	0.26	19.5	7.5	0		77.51	46.93		0.37	0.07
14778	Neurospora TF Circadian Clock - 2019Jun28ABDC2	xc614-16	NCU00285	3	21.26	0.16		22.51	8.96	0.65	19.93	7.93	0.45		87.89	28.55		0.34	0.07
14778	Neurospora TF Circadian Clock - 2019Jun28ABDC2	xc614-2	NCU00285	3	21.63	0.32		20.5	7.19	0.78	18.47	6.47	0.45		113.2	7.35		0.23	0.05
14778	Neurospora TF Circadian Clock - 2019Jun28ABDC2	xc614-3	NCU00285	3	21.35	0.47		21.37	7.88	0.54	19	7	0.44		124.4	50.84		0.29	0.07
14778	Neurospora TF Circadian Clock - 2019Jun28ABDC2	xc614-4	NCU00285	3	21.5	0.1		21.54	8.15	0.78	19.3	7.3	0.61		139.7	73.92		0.26	0.06
14778	Neurospora TF Circadian Clock - 2019Jun28ABDC2	xc1057-1	NCU03417	3	21.9	0.55		20.76	7.61	0.97	18.93	6.93	0.45		80.44	47.1		0.35	0.08
14778	Neurospora TF Circadian Clock - 2019Jun28ABDC2	xc1057-11	NCU03417	3	21.44	0.18		20.33	6.9	0.46	18.17	6.17	0.31		52.68	21.52		0.32	0.08
14778	Neurospora TF Circadian Clock - 2019Jun28ABDC2	xc1057-12	NCU03417	3	21.98	0.32		19.59	6.49	0.74	17.93	5.93	0.46		60.66	33.65		0.26	0.06
14778	Neurospora TF Circadian Clock - 2019Jun28ABDC2	xc1057-13	NCU03417	3	21.88	0.18		19.05	5.89	0.61	17.37	5.37	0.5		68.06	54.52		0.27	0.06
14778	Neurospora TF Circadian Clock - 2019Jun28ABDC2	xc1057-14	NCU03417	3	22.2	0.46		18.06	5.09	0.55	16.7	4.7	0.17		69.99	33.13		0.23	0.06
14778	Neurospora TF Circadian Clock - 2019Jun28ABDC2	xc1057-15	NCU03417	3	22.06	0.08		20.45	7.4	0.65	18.8	6.8	0.53		40.23	17.16		0.3	0.07
14778	Neurospora TF Circadian Clock - 2019Jun28ABDC2	xc1057-2	NCU03417	3	22.18	0.27		19.26	6.28	0.47	17.8	5.8	0.26		34.37	20.57		0.4	0.09
14778	Neurospora TF Circadian Clock - 2019Jun28ABDC2	xc1057-3	NCU03417	3	21.34	0.49		20.59	7.1	0.64	18.3	6.3	0.17		108.9	52.2		0.3	0.07
14778	Neurospora TF Circadian Clock - 2019Jun28ABDC2	xc1057-4	NCU03417	3	21.9	0.13		19.84	6.68	0.22	18.1	6.1	0.1		46.16	10.08		0.31	0.07
14778	Neurospora TF Circadian Clock - 2019Jun28ABDC2	xc1043-11	NCU03481	3	21.24	0.33		20.95	7.39	1.15	18.53	6.53	0.76		46.78	16.9		0.24	0.05
14778	Neurospora TF Circadian Clock - 2019Jun28ABDC2	xc1043-12	NCU03481	3	21.3	0.1		20.14	6.61	1.2	17.87	5.87	0.99		62.94	10.47		0.29	0.07
14778	Neurospora TF Circadian Clock - 2019Jun28ABDC2	xc1043-13	NCU03481	3	21.2	0.37		19.78	6.19	1.08	17.47	5.47	0.67		72.01	29.86		0.25	0.06
14778	Neurospora TF Circadian Clock - 2019Jun28ABDC2	xc1043-14	NCU03481	3	21.39	0.33		21.29	7.82	0.77	18.97	6.97	0.42		79.81	11.87		0.22	0.05
14778	Neurospora TF Circadian Clock - 2019Jun28ABDC2	xc1043-15	NCU03481	3	21.49	0.48		20.64	7.24	0.92	18.47	6.47	0.42		57.89	31.51		0.25	0.05
14778	Neurospora TF Circadian Clock - 2019Jun28ABDC2	xc1043-16	NCU03481	3	21.59	0.32		19.64	6.3	0.46	17.67	5.67	0.15		121.6	24.34		0.23	0.05
14778	Neurospora TF Circadian Clock - 2019Jun28ABDC2	xc1043-17	NCU03481	3	21.38	0.41		19.24	5.77	0.69	17.13	5.13	0.31		109	55.41		0.26	0.07
14778	Neurospora TF Circadian Clock - 2019Jun28ABDC2	xc1043-18	NCU03481	3	21.52	0.38		20.34	6.96	1.06	18.23	6.23	0.67		56.99	33.53		0.33	0.06
14778	Neurospora TF Circadian Clock - 2019Jun28ABDC2	xc1043-19	NCU03481	3	21.54	0.27		20.65	7.28	0.47	18.53	6.53	0.21		54.1	10.41		0.3	0.06
14778	Neurospora TF Circadian Clock - 2019Jun28ABDC2	xc678-1	NCU03931	3	21.62	0.09		23.65	10.32	0.09	21.3	9.3	0		267.7	22.03		0.22	0.05
14778	Neurospora TF Circadian Clock - 2019Jun28ABDC2	xc678-11	NCU03931	3	21.08	0.15		23.37	9.71	0.11	20.53	8.53	0.21		131.5	33.97		0.2	0.05
14778	Neurospora TF Circadian Clock - 2019Jun28ABDC2	xc678-12	NCU03931	3	21.25	0.19		20.64	7.09	0.47	18.27	6.27	0.25		52.92	4.72		0.33	0.06
14778	Neurospora TF Circadian Clock - 2019Jun28ABDC2	xc678-13	NCU03931	3	21.57	0.33		21.37	8.02	0.34	19.2	7.2	0.26		136	14.3		0.24	0.05
14778	Neurospora TF Circadian Clock - 2019Jun28ABDC2	xc678-14	NCU03931	3	21.52	0.25		23.42	10.04	0.38	21	9	0.1		172	26.34		0.21	0.05
14778	Neurospora TF Circadian Clock - 2019Jun28ABDC2	xc678-2	NCU03931	3	21.41	0.18		23.5	10.04	0.22	20.97	8.97	0.15		202.1	69.35		0.21	0.05
14778	Neurospora TF Circadian Clock - 2019Jun28ABDC2	xc678-3	NCU03931	3	21.35	0.3		22.93	9.44	0.77	20.4	8.4	0.53		87.93	14.37		0.31	0.07
14778	Neurospora TF Circadian Clock - 2019Jun28ABDC2	xc678-4	NCU03931	3	21.45	0.08		22.41	8.98	0.41	20.03	8.03	0.32		68	31.09		0.26	0.06
14778	Neurospora TF Circadian Clock - 2019Jun28ABDC2	xc678-5	NCU03931	3	21.32	0.15		23.79	10.28	0.32	21.08	9.08	0.28		96.52	52.98		0.27	0.06
14778	Neurospora TF Circadian Clock - 2019Jun28ABDC2	xc678-6	NCU03931	3	21.26	0.32		22.52	8.97	0.97	19.93	7.93	0.57		130.9	50.39		0.27	0.07
14778	Neurospora TF Circadian Clock - 2019Jun28ABDC2	xc678-7	NCU03931	3	21.39	0.27		23.23	9.76	0.83	20.76	8.76	0.63		69.16	21.48		0.29	0.07
14778	Neurospora TF Circadian Clock - 2019Jun28ABDC2	xc392-1	NCU04179	3	21.65	0.02		21.8	8.5	0.08	19.67	7.67	0.06		104.3	25.05		0.24	0.05
14778	Neurospora TF Circadian Clock - 2019Jun28ABDC2	xc392-2	NCU04179	3	21.49	0.31		21.67	8.26	0.49	19.4	7.4	0.17		114	37.69		0.24	0.05
14778	Neurospora TF Circadian Clock - 2019Jun28ABDC2	xc392-3	NCU04179	3	21.54	0.15		21.06	7.69	0.51	18.9	6.9	0.35		117.8	30.6		0.18	0.04
14778	Neurospora TF Circadian Clock - 2019Jun28ABDC2	xc392-4	NCU04179	3	21.33	0.3		21.64	8.14	0.76	19.23	7.23	0.4		112.7	31.86		0.22	0.05
14778	Neurospora TF Circadian Clock - 2019Jun28ABDC2	xc392-5	NCU04179	3	21.65	0.17		21.4	8.09	0.44	19.3	7.3	0.53		64.49	30.44		0.27	0.06
14778	Neurospora TF Circadian Clock - 2019Jun28ABDC2	xc1094-1	NCU05145	3	21.6	0.15		19.82	6.49	1.16	17.83	5.83	0.95		107.4	48.62		0.24	0.06
14778	Neurospora TF Circadian Clock - 2019Jun28ABDC2	xc1094-11	NCU05145	3	21.35	0.17		19.14	5.65	0.38	17.03	5.03	0.38		129.1	2.52		0.21	0.05
14778	Neurospora TF Circadian Clock - 2019Jun28ABDC2	xc1094-12	NCU05145	3	21.61	0.06		19.36	6.03	0.36	17.43	5.43	0.31		121.4	81.08		0.25	0.06
14778	Neurospora TF Circadian Clock - 2019Jun28ABDC2	xc1094-13	NCU05145	3	21.46	0.16		19.76	6.34	0.31	17.67	5.67	0.21		80.81	57.17		0.25	0.05
14778	Neurospora TF Circadian Clock - 2019Jun28ABDC2	xc1094-14	NCU05145	3	21.69	0.13		19.58	6.31	0.5	17.7	5.7	0.46		130.6	19.71		0.23	0.05
14778	Neurospora TF Circadian Clock - 2019Jun28ABDC2	xc1094-2	NCU05145	3	21.27	0.08		19.63	6.09	0.45	17.4	5.4	0.46		131.3	12.95		0.23	0.06
14778	Neurospora TF Circadian Clock - 2019Jun28ABDC2	xc1094-3	NCU05145	3	21.2	0.08		19.51	5.92	0.17	17.23	5.23	0.21		76.38	30.46		0.21	0.06
14778	Neurospora TF Circadian Clock - 2019Jun28ABDC2	xc1094-4	NCU05145	3	21.63	0.14		19.2	5.88	0.52	17.3	5.3	0.36		55.12	25.03		0.23	0.05
14778	Neurospora TF Circadian Clock - 2019Jun28ABDC2	xc685-1	NCU06971	3	21.25	0.36		21.28	7.73	1.56	18.83	6.83	1.08		62.02	30.23		0.31	0.08
14778	Neurospora TF Circadian Clock - 2019Jun28ABDC2	xc685-11	NCU06971	3	21.19	0.17		20.92	7.33	0.79	18.47	6.47	0.55		52.35	31.88		0.33	0.06
14778	Neurospora TF Circadian Clock - 2019Jun28ABDC2	xc685-12	NCU06971	3	21.28	0.35		20.24	6.71	0.86	17.93	5.93	0.47		56.17	29.77		0.38	0.08
14778	Neurospora TF Circadian Clock - 2019Jun28ABDC2	xc685-13	NCU06971	3	21.34	0.23		20.73	7.23	0.39	18.43	6.43	0.23		55.07	17.4		0.37	0.07
14778	Neurospora TF Circadian Clock - 2019Jun28ABDC2	xc685-14	NCU06971	3	21.05	0.27		20.53	6.85	0.49	18	6	0.2		63.52	23.16		0.39	0.07
14778	Neurospora TF Circadian Clock - 2019Jun28ABDC2	xc685-2	NCU06971	3	21.24	0.49		21.23	7.67	1.41	18.77	6.77	0.85		57.07	16.23		0.29	0.06
14778	Neurospora TF Circadian Clock - 2019Jun28ABDC2	xc685-3	NCU06971	3	20.98	0.14		20.7	6.98	0.5	18.1	6.1	0.52		121	3.29		0.25	0.06
14778	Neurospora TF Circadian Clock - 2019Jun28ABDC2	xc685-4	NCU06971	3	21.09	0.24		20.94	7.28	0.13	18.4	6.4	0.17		69.42	50.56		0.37	0.08
14778	Neurospora TF Circadian Clock - 2019Jun28ABDC2	xc626-1	NCU09033	3	21.28	0.23		21.58	8.04	0.68	19.13	7.13	0.45		114.8	22.5		0.32	0.08
14778	Neurospora TF Circadian Clock - 2019Jun28ABDC2	xc626-11	NCU09033	3	21.41	0.31		20.52	7.07	1.18	18.3	6.3	0.78		70.39	21.01		0.26	0.05
14778	Neurospora TF Circadian Clock - 2019Jun28ABDC2	xc626-12	NCU09033	3	22.08	0.06		19.38	6.34	0.36	17.83	5.83	0.32		111.7	39.74		0.24	0.05
14778	Neurospora TF Circadian Clock - 2019Jun28ABDC2	xc626-13	NCU09033	3	21.78	0.18		20.24	7.02	0.26	18.37	6.37	0.15		72.24	19.79		0.28	0.06
14778	Neurospora TF Circadian Clock - 2019Jun28ABDC2	xc626-14	NCU09033	2	21.72	0.85		21.1	7.85	5.2	19.3	7.3	4.38		14.26	3.39		0.68	0.3
14778	Neurospora TF Circadian Clock - 2019Jun28ABDC2	xc626-2	NCU09033	3	21.41	0.43		22.05	8.6	0.77	19.67	7.67	0.61		64.87	26.8		0.37	0.08
14778	Neurospora TF Circadian Clock - 2019Jun28ABDC2	xc626-3	NCU09033	3	21.49	0.12		21.1	7.69	0.35	18.9	6.9	0.26		64.83	11.5		0.22	0.05
14778	Neurospora TF Circadian Clock - 2019Jun28ABDC2	xc626-4	NCU09033	3	21.54	0.16		21.99	8.62	0.87	19.73	7.73	0.64		52.06	32.55		0.36	0.07
14778	Neurospora TF Circadian Clock - 2019Jun28ABDC2	xc1090-1	NCU10080	3	21.41	0.29		20.97	7.52	0.53	18.7	6.7	0.26		56.86	20.44		0.43	0.09
14778	Neurospora TF Circadian Clock - 2019Jun28ABDC2	xc1090-11	NCU10080	3	20.91	0.25		21.2	7.43	0.68	18.47	6.47	0.45		120.3	22.72		0.33	0.08
14778	Neurospora TF Circadian Clock - 2019Jun28ABDC2	xc1090-12	NCU10080	3	21.37	0.14		20.06	6.58	0.32	17.87	5.87	0.38		155.8	17.7		0.27	0.05
14778	Neurospora TF Circadian Clock - 2019Jun28ABDC2	xc1090-13	NCU10080	3	21.16	0.07		21.62	8.01	0.24	19.07	7.07	0.15		69.84	16.04		0.3	0.07
14778	Neurospora TF Circadian Clock - 2019Jun28ABDC2	xc1090-2	NCU10080	3	21.38	0.28		20.17	6.7	0.7	17.97	5.97	0.38		143.5	44.8		0.33	0.06
14778	Neurospora TF Circadian Clock - 2019Jun28ABDC2	xc1090-3	NCU10080	3	21.26	0.42		19.98	6.43	0.72	17.7	5.7	0.5		104	28.74		0.33	0.07
14778	Neurospora TF Circadian Clock - 2019Jun28ABDC2	xc1090-4	NCU10080	3	21.39	0.11		21.35	7.89	0.47	19.03	7.03	0.32		89.93	4.78		0.27	0.06
14778	Neurospora TF Circadian Clock - 2019Jun28ABDC2	x654-14	WT	12	21.41	0.34		19.98	6.52	0.59	17.82	5.82	0.42		116.1	31.26		0.23	0.05
14778	Neurospora TF Circadian Clock - 2019Jun28ABDC2	x654-16	WT	9	21.22	0.23		20.07	6.5	0.33	17.74	5.74	0.31		124.6	27.98		0.19	0.05
14778	Neurospora TF Circadian Clock - 2019Jun28ABDC2	x661-4	WT	12	21.57	0.26		20.5	7.14	0.88	18.42	6.42	0.64		106	39.88		0.25	0.06
14778	Neurospora TF Circadian Clock - 2019Jun28ABDC2	x661-5	WT	12	21.41	0.2		20.28	6.83	0.5	18.09	6.09	0.38		135.7	49.7		0.23	0.05
14778	Neurospora TF Circadian Clock - 2019Jun28ABDC2	xc1057-21	WT	3	21.51	0.17		19.64	6.25	0.34	17.6	5.6	0.17		70.49	38.8		0.33	0.06
14778	Neurospora TF Circadian Clock - 2019Jun28ABDC2	xc1057-22	WT	3	21.37	0.54		19.62	6.14	0.62	17.47	5.47	0.35		91.37	33.73		0.25	0.05
14778	Neurospora TF Circadian Clock - 2019Jun28ABDC2	xc1057-23	WT	3	21.61	0.2		19.4	6.07	0.35	17.47	5.47	0.23		51.42	43.03		0.43	0.09
14778	Neurospora TF Circadian Clock - 2019Jun28ABDC2	xc1057-24	WT	3	21.3	0.03		19.94	6.42	0.13	17.7	5.7	0.1		79.03	16.17		0.22	0.05
14778	Neurospora TF Circadian Clock - 2019Jun28ABDC2	xc1057-25	WT	3	21.27	0.04		20.46	6.92	0.22	18.13	6.13	0.21		77.73	7.4		0.29	0.07
14778	Neurospora TF Circadian Clock - 2019Jun28ABDC2	xc1090-21	WT	3	21.58	0.36		19.5	6.15	0.42	17.53	5.53	0.25		46.75	21.49		0.28	0.06
14778	Neurospora TF Circadian Clock - 2019Jun28ABDC2	xc1090-22	WT	3	21.36	0.25		19.71	6.22	0.54	17.53	5.53	0.32		90.27	20.47		0.32	0.06
14778	Neurospora TF Circadian Clock - 2019Jun28ABDC2	xc1090-23	WT	3	21.21	0.18		20.22	6.64	0.45	17.87	5.87	0.25		58.9	27.19		0.27	0.05
14778	Neurospora TF Circadian Clock - 2019Jun28ABDC2	xc1090-24	WT	3	21.37	0.2		19.85	6.37	1.11	17.67	5.67	0.83		114.7	64.76		0.32	0.08
14778	Neurospora TF Circadian Clock - 2019Jun28ABDC2	xc1090-25	WT	3	21.47	0.15		20.01	6.6	0.38	17.9	5.9	0.26		103.3	11.82		0.27	0.06
14778	Neurospora TF Circadian Clock - 2019Jun28ABDC2	xc1094-21	WT	3	21.27	0.39		20.43	6.89	0.67	18.1	6.1	0.3		74.09	54.47		0.34	0.07
14778	Neurospora TF Circadian Clock - 2019Jun28ABDC2	xc1094-22	WT	3	21.16	0.36		21.88	8.27	2.64	19.37	7.37	2.22		114.8	88.88		0.26	0.07
14778	Neurospora TF Circadian Clock - 2019Jun28ABDC2	xc1094-23	WT	3	21.15	0.15		20.32	6.71	0.8	17.9	5.9	0.61		86.22	27.53		0.3	0.06
14778	Neurospora TF Circadian Clock - 2019Jun28ABDC2	xc1094-24	WT	3	21.49	0.27		20.17	6.77	0.15	18.07	6.07	0.21		76.72	26.67		0.28	0.06
14778	Neurospora TF Circadian Clock - 2019Jun28ABDC2	xc1094-25	WT	3	21.64	0.22		20.34	7.03	0.8	18.33	6.33	0.55		57.78	34.32		0.37	0.08
14778	Neurospora TF Circadian Clock - 2019Jun28ABDC2	xc614-21	WT	3	21.89	0.07		20.07	6.92	0.36	18.3	6.3	0.26		118.3	21.2		0.27	0.05
14778	Neurospora TF Circadian Clock - 2019Jun28ABDC2	xc614-22	WT	3	21.1	0.24		20.93	7.28	0.21	18.4	6.4	0.1		103.2	21.63		0.3	0.07
14778	Neurospora TF Circadian Clock - 2019Jun28ABDC2	xc685-21	WT	3	21.41	0.55		19.52	6.06	0.92	17.4	5.4	0.46		93.15	46.28		0.2	0.05
14778	Neurospora TF Circadian Clock - 2019Jun28ABDC2	xc685-22	WT	3	21	0.37		22.36	8.65	0.99	19.57	7.57	0.74		113.2	42.51		0.28	0.07
14778	Neurospora TF Circadian Clock - 2019Jun28ABDC2	xc685-23	WT	3	21.31	0.19		20.19	6.68	0.73	17.93	5.93	0.81		136.1	6.42		0.23	0.05
14667	Neurospora TF Circadian Clock - 2019Mar29AB3	xc524-1	NCU02957	3	21.51	0.08		20.72	7.33	0.2	18.57	6.57	0.15		131.2	21.85		0.28	0.05
14667	Neurospora TF Circadian Clock - 2019Mar29AB3	xc524-2	NCU02957	3	21.64	0.02		20.81	7.5	0.44	18.77	6.77	0.38		156.1	12.76		0.3	0.05
14667	Neurospora TF Circadian Clock - 2019Mar29AB3	xc524-3	NCU02957	3	21.83	0.07		20.3	7.1	0.21	18.47	6.47	0.25		164.4	19.19		0.22	0.04
14667	Neurospora TF Circadian Clock - 2019Mar29AB3	xc524-4	NCU02957	3	21.51	0.22		20.8	7.41	0.63	18.63	6.63	0.38		181.5	47.7		0.28	0.06
14667	Neurospora TF Circadian Clock - 2019Mar29AB3	xc541-1	NCU04390	3	20.87	0.2		21.97	8.16	0.37	19.1	7.1	0.2		54.07	18.59		0.3	0.07
14667	Neurospora TF Circadian Clock - 2019Mar29AB3	xc541-2	NCU04390	3	20.59	0.15		21.84	7.86	1.44	18.73	6.73	1.26		59.5	21.76		0.27	0.06
14667	Neurospora TF Circadian Clock - 2019Mar29AB3	xc541-3	NCU04390	2	24.54	0.3		19.76	8.02	0.93	20.2	8.2	0.71		87.62	4.43		0.18	0.04
14667	Neurospora TF Circadian Clock - 2019Mar29AB3	xc541-4	NCU04390	3	20.67	0.14		21.56	7.63	0.41	18.57	6.57	0.23		78.16	26.26		0.34	0.08
14667	Neurospora TF Circadian Clock - 2019Mar29AB3	xc541-5	NCU04390	3	20.78	0.2		21.72	7.87	1.77	18.8	6.8	1.38		79.97	23.46		0.19	0.05
14667	Neurospora TF Circadian Clock - 2019Mar29AB3	xc393-1	NCU04731	3	21.24	0.25		19.47	5.91	0.65	17.23	5.23	0.64		120.9	10.31		0.24	0.05
14667	Neurospora TF Circadian Clock - 2019Mar29AB3	xc393-2	NCU04731	3	21.76	0.31		19.59	6.35	0.16	17.77	5.77	0.15		331.8	78		0.17	0.03
14667	Neurospora TF Circadian Clock - 2019Mar29AB3	xc393-3	NCU04731	3	21.24	0.26		19.67	6.11	0.59	17.4	5.4	0.36		122.4	17.6		0.25	0.05
14667	Neurospora TF Circadian Clock - 2019Mar29AB3	xc393-4	NCU04731	3	21.1	0.12		19.6	5.95	0.15	17.23	5.23	0.12		180.7	19.02		0.27	0.06
14667	Neurospora TF Circadian Clock - 2019Mar29AB3	xc620-1	NCU04731	3	20.48	0.48		20.26	6.2	1.37	17.27	5.27	0.76		126.3	41.88		0.23	0.06
14667	Neurospora TF Circadian Clock - 2019Mar29AB3	xc620-2	NCU04731	3	20.96	0.02		19.24	5.5	0.11	16.8	4.8	0.1		132.7	16.35		0.24	0.06
14667	Neurospora TF Circadian Clock - 2019Mar29AB3	xc620-3	NCU04731	3	20.61	0.13		20.22	6.24	0.84	17.37	5.37	0.61		154.5	43.99		0.19	0.05
14667	Neurospora TF Circadian Clock - 2019Mar29AB3	xc620-4	NCU04731	3	20.84	0.13		19.39	5.57	0.77	16.83	4.83	0.76		220.5	90.22		0.2	0.05
14667	Neurospora TF Circadian Clock - 2019Mar29AB3	xc542-1	NCU06799	3	20.71	0.2		23.95	10.05	1.12	20.63	8.63	0.95		31.69	10.3		0.42	0.1
14667	Neurospora TF Circadian Clock - 2019Mar29AB3	xc542-16	NCU06799	3	20.93	0.55		23.46	9.7	0.49	20.32	8.32	0.68		31.54	14.66		0.34	0.1
14667	Neurospora TF Circadian Clock - 2019Mar29AB3	xc542-18	NCU06799	3	20.59	0.02		22.88	8.89	0.33	19.63	7.63	0.29		31.62	2.09		0.25	0.06
14667	Neurospora TF Circadian Clock - 2019Mar29AB3	xc542-2	NCU06799	3	20.21	0.13		22.84	8.59	1.08	19.23	7.23	0.81		76.35	35.08		0.27	0.07
14667	Neurospora TF Circadian Clock - 2019Mar29AB3	xc542-20	NCU06799	3	20.3	0.09		22.19	8	0.61	18.77	6.77	0.47		57.45	9.45		0.21	0.06
14667	Neurospora TF Circadian Clock - 2019Mar29AB3	xc542-3	NCU06799	3	20.69	0.26		22.23	8.31	0.18	19.17	7.17	0.35		66.3	10.34		0.23	0.06
14667	Neurospora TF Circadian Clock - 2019Mar29AB3	xc542-4	NCU06799	3	20.3	0.1		21.79	7.6	0.72	18.43	6.43	0.67		55.56	11.18		0.2	0.06
14667	Neurospora TF Circadian Clock - 2019Mar29AB3	xc1049-1	NCU07834	3	21	0.58		21.58	7.86	1.13	18.87	6.87	0.57		154.9	53.4		0.36	0.07
14667	Neurospora TF Circadian Clock - 2019Mar29AB3	xc1049-2	NCU07834	3	20.8	0.05		21.46	7.62	0.09	18.6	6.6	0.1		85.59	2.83		0.43	0.08
14667	Neurospora TF Circadian Clock - 2019Mar29AB3	xc1049-3	NCU07834	3	20.87	0.08		22.11	8.31	0.47	19.23	7.23	0.4		108.3	38		0.39	0.08
14667	Neurospora TF Circadian Clock - 2019Mar29AB3	xc1049-4	NCU07834	3	21.38	0.11		20.73	7.26	0.47	18.47	6.47	0.4		92.39	39.69		0.26	0.06
14667	Neurospora TF Circadian Clock - 2019Mar29AB3	xc1049-5	NCU07834	3	21.32	0.18		20.31	6.8	0.77	18.03	6.03	0.55		126.7	23.65		0.22	0.05
14667	Neurospora TF Circadian Clock - 2019Mar29AB3	xc1049-6	NCU07834	3	21.51	0.47		20.88	7.49	1.15	18.7	6.7	0.66		141.9	74.93		0.26	0.06
14667	Neurospora TF Circadian Clock - 2019Mar29AB3	xc1049-7	NCU07834	3	21.36	0.08		20.41	6.92	0.2	18.17	6.17	0.21		125	20.78		0.27	0.05
14667	Neurospora TF Circadian Clock - 2019Mar29AB3	xc529-1	NCU07900	3	20.89	0.22		22.26	8.48	2.06	19.37	7.37	1.6		73.44	31.01		0.21	0.06
14667	Neurospora TF Circadian Clock - 2019Mar29AB3	xc529-2	NCU07900	3	21.19	0.12		20.58	6.99	0.6	18.17	6.17	0.47		123	49.74		0.23	0.06
14667	Neurospora TF Circadian Clock - 2019Mar29AB3	xc529-3	NCU07900	3	20.85	0.39		21.19	7.38	1.08	18.4	6.4	0.61		110.9	58.35		0.24	0.06
14667	Neurospora TF Circadian Clock - 2019Mar29AB3	xc529-4	NCU07900	3	21.05	0.37		21.55	7.87	0.81	18.9	6.9	0.4		101.9	40.81		0.26	0.06
14667	Neurospora TF Circadian Clock - 2019Mar29AB3	xc529-5	NCU07900	3	20.72	0.4		23.07	9.17	2.09	20.05	8.05	1.66		50.67	29.47		0.36	0.08
14667	Neurospora TF Circadian Clock - 2019Mar29AB3	xc529-6	NCU07900	3	21.32	0.14		21.16	7.65	0.53	18.8	6.8	0.44		90.04	25.88		0.34	0.06
14667	Neurospora TF Circadian Clock - 2019Mar29AB3	xc456-1	NCU08055	3	21.33	0.14		20.52	7.02	0.65	18.23	6.23	0.64		120.3	28.76		0.18	0.05
14667	Neurospora TF Circadian Clock - 2019Mar29AB3	xc456-2	NCU08055	3	21.45	0.1		21.37	7.94	0.6	19.1	7.1	0.46		116.6	49.8		0.23	0.06
14667	Neurospora TF Circadian Clock - 2019Mar29AB3	xc456-3	NCU08055	3	21.62	0.08		20.39	7.07	0.3	18.37	6.37	0.25		97	15.08		0.23	0.05
14667	Neurospora TF Circadian Clock - 2019Mar29AB3	xc456-4	NCU08055	3	20.8	0.29		21.42	7.57	0.07	18.57	6.57	0.21		52	8.52		0.28	0.07
14667	Neurospora TF Circadian Clock - 2019Mar29AB3	xc682-11	NCU09739	3	21.64	0.14		21.34	8.03	0.52	19.23	7.23	0.38		52.68	5.69		0.35	0.08
14667	Neurospora TF Circadian Clock - 2019Mar29AB3	xc682-12	NCU09739	3	21.37	0.24		22.87	9.39	0.29	20.37	8.37	0.47		150.9	7.56		0.2	0.06
14667	Neurospora TF Circadian Clock - 2019Mar29AB3	xc682-13	NCU09739	3	21.53	0.12		21.11	7.74	0.21	18.93	6.93	0.15		57.96	17.68		0.31	0.07
14667	Neurospora TF Circadian Clock - 2019Mar29AB3	xc682-14	NCU09739	3	21.3	0.11		21.07	7.55	0.14	18.7	6.7	0.17		65.64	15.17		0.33	0.06
14667	Neurospora TF Circadian Clock - 2019Mar29AB3	x654-14	WT	6	21.22	0.12		21.04	7.46	0.27	18.6	6.6	0.26		84.35	19.43		0.3	0.07
14667	Neurospora TF Circadian Clock - 2019Mar29AB3	x654-16	WT	6	21.44	0.11		20.15	6.72	0.32	18	6	0.3		134.2	32.47		0.26	0.06
14667	Neurospora TF Circadian Clock - 2019Mar29AB3	x661-4	WT	6	21.6	0.29		20.06	6.72	0.66	18.05	6.05	0.45		115.2	29.69		0.27	0.06
14667	Neurospora TF Circadian Clock - 2019Mar29AB3	x661-5	WT	6	21.41	0.11		20.32	6.87	0.45	18.13	6.13	0.44		85.18	25.6		0.27	0.06
14615	Neurospora TF Circadian Clock - 2019May25ABCD2	xc605-1	NCU00749	3	21.36	0.3		20.76	7.28	1.14	18.47	6.47	0.8		136.9	43.57		0.32	0.08
14615	Neurospora TF Circadian Clock - 2019May25ABCD2	xc605-2	NCU00749	3	21.3	0.23		20.25	6.73	0.31	17.97	5.97	0.15		197.4	42.1		0.22	0.05
14615	Neurospora TF Circadian Clock - 2019May25ABCD2	xc605-3	NCU00749	3	21.12	0.38		21.21	7.57	0.4	18.67	6.67	0.21		110.2	14.51		0.35	0.07
14615	Neurospora TF Circadian Clock - 2019May25ABCD2	xc605-4	NCU00749	3	21.17	0.18		21.36	7.75	0.24	18.83	6.83	0.06		111.8	27.93		0.33	0.07
14615	Neurospora TF Circadian Clock - 2019May25ABCD2	xc1077-1	NCU01145	3	21.77	0.07		19.59	6.36	0.12	17.77	5.77	0.06		122.5	9.52		0.28	0.05
14615	Neurospora TF Circadian Clock - 2019May25ABCD2	xc1077-2	NCU01145	3	21.9	0.02		20.16	7.01	0.11	18.4	6.4	0.1		114	16.37		0.27	0.05
14615	Neurospora TF Circadian Clock - 2019May25ABCD2	xc1077-3	NCU01145	3	21.96	0.19		19.89	6.78	0.16	18.2	6.2	0.1		93.76	9.68		0.22	0.05
14615	Neurospora TF Circadian Clock - 2019May25ABCD2	xc1077-4	NCU01145	3	21.89	0.16		19.66	6.5	0.1	17.93	5.93	0.12		91.61	9.85		0.26	0.06
14615	Neurospora TF Circadian Clock - 2019May25ABCD2	xc1077-5	NCU01145	3	21.89	0.09		19.55	6.39	0.4	17.83	5.83	0.29		127.6	17.1		0.23	0.05
14615	Neurospora TF Circadian Clock - 2019May25ABCD2	xc1077-6	NCU01145	3	21.26	0.25		20.96	7.42	0.37	18.57	6.57	0.25		106.4	18.98		0.27	0.07
14615	Neurospora TF Circadian Clock - 2019May25ABCD2	xc1077-7	NCU01145	3	22.01	0.39		19.45	6.37	0.4	17.83	5.83	0.23		104.4	18.29		0.2	0.05
14615	Neurospora TF Circadian Clock - 2019May25ABCD2	xc548-1	NCU01629	3	21.73	0.42		21.26	8.01	1.12	19.23	7.23	0.67		75.15	33.19		0.23	0.05
14615	Neurospora TF Circadian Clock - 2019May25ABCD2	xc548-2	NCU01629	3	21.67	0.36		20.61	7.32	1.23	18.6	6.6	0.8		81.93	28.13		0.27	0.06
14615	Neurospora TF Circadian Clock - 2019May25ABCD2	xc548-3	NCU01629	3	21.54	0.32		20.54	7.16	0.25	18.43	6.43	0.06		110.1	14.39		0.24	0.06
14615	Neurospora TF Circadian Clock - 2019May25ABCD2	xc548-4	NCU01629	3	21.76	0.47		20.49	7.26	0.7	18.57	6.57	0.45		110.6	52.89		0.24	0.05
14615	Neurospora TF Circadian Clock - 2019May25ABCD2	xc610-1	NCU01629	3	22.16	0.19		20.04	7.04	0.24	18.5	6.5	0.1		70.14	2.85		0.34	0.06
14615	Neurospora TF Circadian Clock - 2019May25ABCD2	xc610-2	NCU01629	3	21.69	0.11		20.14	6.86	0.27	18.2	6.2	0.17		84.99	8.97		0.3	0.06
14615	Neurospora TF Circadian Clock - 2019May25ABCD2	xc610-3	NCU01629	3	21.88	0.13		19.67	6.5	0.39	17.93	5.93	0.25		157.6	24.6		0.29	0.06
14615	Neurospora TF Circadian Clock - 2019May25ABCD2	xc610-4	NCU01629	3	21.86	0.3		20.28	7.1	0.66	18.47	6.47	0.35		111.8	5.19		0.23	0.05
14615	Neurospora TF Circadian Clock - 2019May25ABCD2	xc610-5	NCU01629	3	22.26	0.07		19.84	6.9	0.8	18.4	6.4	0.7		98.49	6.91		0.29	0.06
14615	Neurospora TF Circadian Clock - 2019May25ABCD2	xc610-6	NCU01629	3	22.13	0.13		19.52	6.51	0.18	18	6	0.2		138.1	22.69		0.24	0.05
14615	Neurospora TF Circadian Clock - 2019May25ABCD2	xc610-7	NCU01629	3	22.02	0.36		19.92	6.84	0.43	18.27	6.27	0.15		151.3	14.92		0.24	0.05
14615	Neurospora TF Circadian Clock - 2019May25ABCD2	xc610-8	NCU01629	3	21.7	0.1		20.32	7.05	0.48	18.37	6.37	0.35		113.7	20.66		0.26	0.06
14615	Neurospora TF Circadian Clock - 2019May25ABCD2	xc1213-1	NCU01706	3	21.96	0.17		19.89	6.78	0.45	18.2	6.2	0.36		119.3	61.25		0.28	0.06
14615	Neurospora TF Circadian Clock - 2019May25ABCD2	xc1213-2	NCU01706	3	21.9	0.2		20.09	6.94	0.51	18.33	6.33	0.31		101.1	23.02		0.21	0.05
14615	Neurospora TF Circadian Clock - 2019May25ABCD2	xc1213-3	NCU01706	3	21.76	0.37		20.26	7.03	0.38	18.37	6.37	0.06		119.1	37.22		0.2	0.04
14615	Neurospora TF Circadian Clock - 2019May25ABCD2	xc1213-4	NCU01706	3	21.89	0.17		20.4	7.25	0.52	18.6	6.6	0.36		120.6	27.25		0.21	0.05
14615	Neurospora TF Circadian Clock - 2019May25ABCD2	xc1213-5	NCU01706	3	21.63	0.37		20.64	7.32	0.56	18.6	6.6	0.2		96.6	26.09		0.29	0.07
14615	Neurospora TF Circadian Clock - 2019May25ABCD2	xc1080-1	NCU02012	3	21.46	0.18		20.81	7.39	0.32	18.6	6.6	0.17		107.2	13.08		0.31	0.07
14615	Neurospora TF Circadian Clock - 2019May25ABCD2	xc1080-11	NCU02012	3	21.85	0.03		19.81	6.63	0.44	18.03	6.03	0.38		120.3	10.11		0.24	0.04
14615	Neurospora TF Circadian Clock - 2019May25ABCD2	xc1080-12	NCU02012	3	21.34	0.33		20.96	7.47	0.54	18.63	6.63	0.55		59.98	28.03		0.29	0.07
14615	Neurospora TF Circadian Clock - 2019May25ABCD2	xc1080-2	NCU02012	3	21.27	0.1		21.44	7.9	0.18	19	7	0.1		66.9	6.01		0.32	0.07
14615	Neurospora TF Circadian Clock - 2019May25ABCD2	xc545-1	NCU02017	3	22.3	0.26		22.53	9.61	0.68	20.93	8.93	0.58		6.69	2.67		0.63	0.23
14615	Neurospora TF Circadian Clock - 2019May25ABCD2	xc545-2	NCU02017	3	21.87	0.7		22.67	9.5	1.55	20.89	8.89	1.16		10.87	2.25		0.6	0.25
14615	Neurospora TF Circadian Clock - 2019May25ABCD2	xc545-3	NCU02017	2	23.02	0.35		20.39	7.88	0.53	19.55	7.55	0.21		16.44	4.31		0.57	0.24
14615	Neurospora TF Circadian Clock - 2019May25ABCD2	xc545-4	NCU02017	2	23.74	0.23		20.37	8.24	0.02	20.15	8.15	0.21		13.24	1		0.49	0.27
14615	Neurospora TF Circadian Clock - 2019May25ABCD2	xc545-5	NCU02017	3	23.24	1.4		21.62	9.23	0.21	20.93	8.93	1.4		7.06	3.31		0.76	0.29
14615	Neurospora TF Circadian Clock - 2019May25ABCD2	xc932-1	NCU02307	3	20.68	0.2		21.4	7.47	0.37	18.43	6.43	0.15		67.6	20.74		0.31	0.06
14615	Neurospora TF Circadian Clock - 2019May25ABCD2	xc932-2	NCU02307	3	21.28	0.25		20.19	6.65	0.69	17.9	5.9	0.82		97.56	27.52		0.22	0.05
14615	Neurospora TF Circadian Clock - 2019May25ABCD2	xc932-3	NCU02307	3	21.01	0.04		20.87	7.16	0.11	18.27	6.27	0.12		96.93	18.07		0.3	0.07
14615	Neurospora TF Circadian Clock - 2019May25ABCD2	xc540-1	NCU03905	3	21.64	0.23		20.08	6.78	0.78	18.1	6.1	0.53		85.18	18.07		0.2	0.05
14615	Neurospora TF Circadian Clock - 2019May25ABCD2	xc540-2	NCU03905	3	21.72	0.23		20	6.74	0.31	18.1	6.1	0.1		109.1	15.65		0.22	0.05
14615	Neurospora TF Circadian Clock - 2019May25ABCD2	xc540-3	NCU03905	3	21.25	0.42		20.86	7.31	0.35	18.47	6.47	0.25		86.13	18.36		0.17	0.04
14615	Neurospora TF Circadian Clock - 2019May25ABCD2	xc540-4	NCU03905	3	21.42	0.21		20.43	6.98	0.26	18.23	6.23	0.06		95.01	4.42		0.23	0.05
14615	Neurospora TF Circadian Clock - 2019May25ABCD2	xc454-1	NCU03938	3	22.2	0.4		21.66	8.69	0.33	20.03	8.03	0.21		38.29	9.44		0.19	0.05
14615	Neurospora TF Circadian Clock - 2019May25ABCD2	xc454-2	NCU03938	3	21.77	1.18		23	9.77	2.9	21.22	9.22	2.2		18.38	6.3		0.45	0.23
14615	Neurospora TF Circadian Clock - 2019May25ABCD2	xc454-3	NCU03938	3	21.75	0.57		23.54	10.3	2.02	21.49	9.49	1.63		22.53	12.72		0.37	0.11
14615	Neurospora TF Circadian Clock - 2019May25ABCD2	xc454-4	NCU03938	3	21.97	0.38		22.77	9.66	1.18	20.97	8.97	0.93		30.08	12.94		0.4	0.23
14615	Neurospora TF Circadian Clock - 2019May25ABCD2	xc454-5	NCU03938	3	21.85	0.49		23.13	9.95	1.42	21.2	9.2	1.13		30.11	14.96		0.3	0.09
14615	Neurospora TF Circadian Clock - 2019May25ABCD2	xc454-6	NCU03938	3	21.69	0.71		23.42	10.15	1.62	21.37	9.37	1.11		32.9	17.45		0.36	0.09
14615	Neurospora TF Circadian Clock - 2019May25ABCD2	xc930-1	NCU04359	3	21.9	0.45		20.07	6.92	0.86	18.3	6.3	0.44		75.79	24.55		0.29	0.07
14615	Neurospora TF Circadian Clock - 2019May25ABCD2	xc930-2	NCU04359	3	21.83	0.16		19.93	6.74	0.04	18.13	6.13	0.15		74.76	30.54		0.28	0.06
14615	Neurospora TF Circadian Clock - 2019May25ABCD2	xc930-3	NCU04359	3	21.73	0.45		20.25	6.99	0.06	18.33	6.33	0.32		114.7	50.11		0.24	0.06
14615	Neurospora TF Circadian Clock - 2019May25ABCD2	xc1221-1	NCU05208	3	21.28	0.02		21.12	7.59	0.38	18.73	6.73	0.35		92.97	21.94		0.31	0.07
14615	Neurospora TF Circadian Clock - 2019May25ABCD2	xc1221-2	NCU05208	3	22.02	0.11		20.09	7.01	0.45	18.43	6.43	0.32		116.4	18.87		0.21	0.05
14615	Neurospora TF Circadian Clock - 2019May25ABCD2	xc1221-3	NCU05208	3	21.63	0.21		20.38	7.07	0.69	18.37	6.37	0.47		89.86	23.37		0.24	0.06
14615	Neurospora TF Circadian Clock - 2019May25ABCD2	xc1221-4	NCU05208	3	21.61	0.25		20.51	7.19	0.47	18.47	6.47	0.21		68.8	2.95		0.26	0.05
14615	Neurospora TF Circadian Clock - 2019May25ABCD2	xc1221-5	NCU05208	3	21.97	0.11		19.34	6.23	0.07	17.7	5.7	0.1		101.7	5.76		0.27	0.06
14615	Neurospora TF Circadian Clock - 2019May25ABCD2	xc1221-6	NCU05208	3	22.14	0.07		19.37	6.36	0.55	17.87	5.87	0.45		90.85	12.67		0.22	0.05
14615	Neurospora TF Circadian Clock - 2019May25ABCD2	xc1221-7	NCU05208	3	21.6	0.2		20.75	7.42	0.25	18.67	6.67	0.06		72.29	19.33		0.26	0.06
14615	Neurospora TF Circadian Clock - 2019May25ABCD2	xc1221-8	NCU05208	3	21.58	0.28		20.43	7.08	0.61	18.37	6.37	0.35		73.48	16.62		0.27	0.05
14615	Neurospora TF Circadian Clock - 2019May25ABCD2	xc612-1	NCU05909	3	21.97	0.28		20.18	7.07	0.45	18.47	6.47	0.25		110.6	22.61		0.26	0.06
14615	Neurospora TF Circadian Clock - 2019May25ABCD2	xc612-2	NCU05909	3	22.06	0.49		20.11	7.05	1.18	18.47	6.47	0.67		104.7	56.53		0.23	0.06
14615	Neurospora TF Circadian Clock - 2019May25ABCD2	xc612-3	NCU05909	3	21.74	0.1		20.02	6.77	0.28	18.13	6.13	0.23		122.5	34.45		0.21	0.04
14615	Neurospora TF Circadian Clock - 2019May25ABCD2	xc612-4	NCU05909	3	21.91	0.26		19.51	6.36	0.52	17.8	5.8	0.26		181.6	19.16		0.19	0.04
14615	Neurospora TF Circadian Clock - 2019May25ABCD2	xc549 -1	NCU06919	3	21.3	0.67		21.15	7.63	0.77	18.77	6.77	0.78		55.25	19.36		0.22	0.05
14615	Neurospora TF Circadian Clock - 2019May25ABCD2	xc549-2	NCU06919	3	21.32	0.06		21.35	7.85	0.76	18.97	6.97	0.68		38.79	11.39		0.25	0.06
14615	Neurospora TF Circadian Clock - 2019May25ABCD2	xc549-3	NCU06919	3	21.56	0.16		21.2	7.84	0.99	19.03	7.03	0.76		53.2	5.58		0.25	0.05
14615	Neurospora TF Circadian Clock - 2019May25ABCD2	xc549-4	NCU06919	3	21.59	0.26		21.41	8.07	0.84	19.27	7.27	0.96		32.72	4.45		0.41	0.13
14615	Neurospora TF Circadian Clock - 2019May25ABCD2	xc549-5	NCU06919	3	21.82	0.16		21.53	8.33	0.38	19.57	7.57	0.25		33.61	12.84		0.28	0.06
14615	Neurospora TF Circadian Clock - 2019May25ABCD2	xc549-6	NCU06919	3	21.76	0.12		21.65	8.42	0.29	19.63	7.63	0.29		46.83	15.83		0.25	0.05
14615	Neurospora TF Circadian Clock - 2019May25ABCD2	xc549-7	NCU06919	3	21.32	0.23		21.8	8.3	0.34	19.37	7.37	0.51		49.56	8.76		0.27	0.05
14615	Neurospora TF Circadian Clock - 2019May25ABCD2	xc600-1	NCU08634	3	21.7	0.16		21.5	8.23	0.88	19.43	7.43	0.65		89.84	16.15		0.19	0.05
14615	Neurospora TF Circadian Clock - 2019May25ABCD2	xc600-2	NCU08634	3	21.84	0.11		20.37	7.19	0.63	18.53	6.53	0.51		130.8	5.68		0.2	0.04
14615	Neurospora TF Circadian Clock - 2019May25ABCD2	xc600-3	NCU08634	3	21.72	0.33		20.92	7.66	0.72	18.93	6.93	0.38		95.82	12.79		0.23	0.05
14615	Neurospora TF Circadian Clock - 2019May25ABCD2	xc600-4	NCU08634	3	21.83	0.14		20.41	7.21	0.5	18.57	6.57	0.35		111.7	17.11		0.21	0.04
14615	Neurospora TF Circadian Clock - 2019May25ABCD2	xc600-5	NCU08634	3	21.7	0.22		20.61	7.33	0.41	18.63	6.63	0.21		121.1	16.42		0.25	0.05
14615	Neurospora TF Circadian Clock - 2019May25ABCD2	xc933-1	NCU08658	3	21.69	0.64		20.57	7.29	1.04	18.57	6.57	0.45		59.99	20.63		0.26	0.06
14615	Neurospora TF Circadian Clock - 2019May25ABCD2	xc933-2	NCU08658	3	21.87	0.28		19.98	6.81	0.39	18.2	6.2	0.36		96.8	47.01		0.22	0.05
14615	Neurospora TF Circadian Clock - 2019May25ABCD2	xc933-3	NCU08658	3	21.5	0.37		20.52	7.12	0.91	18.37	6.37	0.5		94.31	51.75		0.28	0.06
14615	Neurospora TF Circadian Clock - 2019May25ABCD2	xc933-4	NCU08658	3	21.64	0.15		19.78	6.47	0.35	17.83	5.83	0.21		115.1	25.61		0.24	0.05
14615	Neurospora TF Circadian Clock - 2019May25ABCD2	x654-14	WT	9	21.77	0.5		20.21	6.98	1.11	18.31	6.31	0.63		70.88	23.31		0.21	0.05
14615	Neurospora TF Circadian Clock - 2019May25ABCD2	x654-16	WT	9	21.57	0.25		19.99	6.64	0.63	17.97	5.97	0.42		76.72	18.17		0.19	0.04
14615	Neurospora TF Circadian Clock - 2019May25ABCD2	x661-14	WT	3	21.79	0.53		19.63	6.41	1.42	17.8	5.8	0.87		89.34	15.57		0.21	0.05
14615	Neurospora TF Circadian Clock - 2019May25ABCD2	x661-16	WT	3	21.64	0.12		19.18	5.87	0.04	17.3	5.3	0.1		117.9	16.66		0.19	0.04
14615	Neurospora TF Circadian Clock - 2019May25ABCD2	x661-4	WT	12	21.73	0.31		20.21	6.96	0.71	18.29	6.29	0.43		69.55	11.51		0.2	0.04
14615	Neurospora TF Circadian Clock - 2019May25ABCD2	x661-5	WT	12	21.7	0.29		19.84	6.57	0.75	17.93	5.93	0.58		70.48	13.94		0.19	0.04
